# Supplementary material for: Exploiting the vicinal disubstituent effect on the diastereoselective synthesis of γ and δ lactones
Source: Royal Society of Chemistry journal article supplement (doi:10.1039/c8ob02715c), 2018-11-16
Supplement: c8ob02715c2.pdf [file c8ob02715c2.pdf]

## ***Exploiting the vicinal disubstituent effect in the diastereoselective synthesis of $\gamma$ and $\delta$ lactones***

Elisabetta Brenna,<sup>a</sup> Francesco Dalla Santa,<sup>a</sup> Francesco G. Gatti,<sup>\*,a</sup> Giuseppe Gatti<sup>b</sup> and Davide Tessaro<sup>a</sup>

a) Dipartimento di Chimica, Materiali ed Ingegneria Chimica "G. Natta", Politecnico di Milano, P.zza Leonardo da Vinci 32, 20133 Milano, Italy

b) Dipartimento di Scienze Biomolecolari Scuola di Farmacia, Università degli Studi di Urbino, P.zza del Rinascimento 6, 61029 Urbino, Italy

### **SUPPORTING INFORMATION**

#### **Index**

|                                                                                           |         |
|-------------------------------------------------------------------------------------------|---------|
| General Remarks                                                                           | S02     |
| Synthesis of $\gamma$ -hydroxyesters <b>1c-d</b>                                          | S03-S04 |
| Synthesis of <i>Aerangis</i> L. <b>2g</b> and lactones <b>2h-l</b>                        | S04-S05 |
| Synthesis of $\gamma$ -hydroxyesters <b>1e-f</b> and $\delta$ -hydroxyesters <b>1g-1i</b> | S05-S06 |
| Synthesis of <i>trans</i> lactones                                                        | S06-S07 |
| Synthesis of ( <i>syn</i> )-silyl ethers                                                  | S07-S08 |
| Synthesis of ( <i>syn</i> )- <b>1i</b>                                                    | S08-S08 |
| Synthesis of <i>trans</i> lactones                                                        | S08-S09 |
| Copy of <sup>1</sup> H- and <sup>13</sup> C- NMR spectra                                  | S10-S37 |
| Kinetics                                                                                  | S38-S49 |
| Complete catalytic cycle                                                                  | S50     |
| Conformational analysis                                                                   | S51     |
| References                                                                                | S52     |

#### **List of Figures and Tables**

|                                                                          |     |
|--------------------------------------------------------------------------|-----|
| <b>Figure SI.1</b> Kinetic scheme                                        | S38 |
| <b>Table SI-1</b> Summary of kinetic data in CDCl <sub>3</sub> at 303 K  | S45 |
| <b>Table SI-2</b> Summary of kinetic data in different solvents at 303 K | S49 |

## General remarks

$^1\text{H}$  and  $^{13}\text{C}$  NMR spectra were recorded on a 400 or 500 MHz spectrometers in  $\text{CDCl}_3$  solutions at room temperature. The residual  $\text{CHCl}_3$  or TMS were used as internal reference for  $^1\text{H}$  or  $^{13}\text{C}$ . High-resolution MS spectra were recorded with a Q-TOF mass spectrometer, equipped with an EI source. Chemical shifts are expressed in ppm and  $J$  values in Hz. GC-MS analyses were performed on a gas-chromatograph equipped with an HP-5973 mass detector and a  $30\text{ m} \times 0.25\text{ mm} \times 0.25\text{ }\mu\text{m}$  column. Temperature program:  $60\text{ }^\circ\text{C}$  (1 min) /  $6\text{ }^\circ\text{C min}^{-1}$  /  $150\text{ }^\circ\text{C}$  (1 min) /  $12\text{ }^\circ\text{C min}^{-1}$  /  $280\text{ }^\circ\text{C}$  (5 min). Thin layer chromatography (TLC) analyses were performed on pre-coated silica gel 60 F254 plates, and column chromatographic separations were carried out on silica gel. The reagents were used without further purification, while where required, the solvents were dried over molecular sieves (4 Å).

## Synthesis of $\gamma$ -hydroxyesters **1c-d**

The hydroxyesters **1c-d** were prepared by a two steps sequence according to the following scheme: *i*) addition of an organometallic reagent (MeLi or *i*-PrMgI) to the commercially available ethyl 4-oxo-3-methylcrotonate to give the corresponding allylic alcohol;<sup>1</sup> *ii*) catalytic hydrogenation of the C=C double bond.

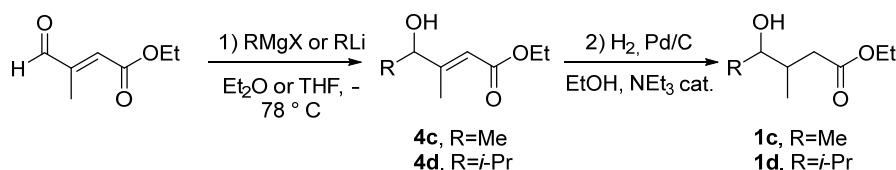

### General procedure for the organometallic addition

To a solution of the commercially available ethyl formylcrotonate (10 mmol) in anhydrous Et<sub>2</sub>O (40 mL) at -78° C under a N<sub>2</sub> atmosphere, an organometallic solution (12 mmol) was dropwisely added. For the synthesis of **4c** was used a solution of the commercially available MeLi (1.6 M in THF), whereas for ethyl **4d**, *i*-PrMgBr was freshly prepared in Et<sub>2</sub>O adopting a standard procedure.<sup>1</sup> After 2 hours, the reaction was quenched with a solution of NH<sub>4</sub>Cl (sat., 50 mL). The reaction mixture was left to reach rt and washed with Et<sub>2</sub>O (2 x 20 mL). The combined organic layers were washed with brine (sat., 30 mL) and dried over Na<sub>2</sub>SO<sub>4</sub>. The solvent was removed under reduced pressure, and the crude material was submitted to column chromatography (Hexane/AcOEt, 8:2) affording the intermediate allylic alcohol as colourless liquid.

**Ethyl (E)-4-hydroxy-3-methylpent-2-enoate (4c)**. Yield = 54% (0.85 g); *t*<sub>r</sub>=11.96 min 95% purity by GC; <sup>1</sup>H-NMR (400 MHz, CDCl<sub>3</sub>):  $\delta$  5.96 (m, *J* = 1.3, 1H), 4.27 (m, 1H), 4.17 (q, *J* = 7.1, 2H), 2.13 (t, *J* = 1.3, 3H), 1.67 (bd, 1H), 1.32 (d, *J* = 6.5, 3H), 1.28 (t, *J* = 7.1, 3H); <sup>13</sup>C-NMR (101 MHz, CDCl<sub>3</sub>):  $\delta$  = 166.94, 161.08, 114.10, 72.42, 59.75, 21.75, 14.89, 14.28; GC-MS: *m/z* (%) 158 (M<sup>+</sup>, 2), 140 (M<sup>+</sup>-18, 21), 129 (M<sup>+</sup>-29, 5), 115 (M<sup>+</sup>,100).<sup>2</sup>

**Ethyl (E)-4-hydroxy-3,5-dimethylhex-2-enoate (4d)**. Yield = 45% (0.84 g); *t*<sub>r</sub>=14.73 min (*E*) 93% purity by GC; *E/Z* 88:12 by <sup>1</sup>H-NMR; <sup>1</sup>H-NMR (400 MHz, CDCl<sub>3</sub>):  $\delta$  5.88 (m, *J* = 1.3, 1H), 4.17 (q, *J* = 7.1, 2H), 3.80 (d, *J* = 6.1, 1H), 2.11 (t, *J* = 1.3, 3H), 1.89 (m, 1H), 1.29 (t, *J* = 7.1, 3H), 1.28 (t, *J* = 7.1, 3H), 0.93-0.90 (m, 6H); <sup>13</sup>C-NMR (101 MHz, CDCl<sub>3</sub>):  $\delta$  = 166.71, 159.26, 116.20, 81.89, 59.72, 30.99, 19.60, 16.77, 14.78, 14.26; GC-MS: *m/z* (%) 186 (M<sup>+</sup>, 2), 168 (3), 143 (M-43, 100), 125 (10); HRMS (ESI) calcd for C<sub>10</sub>H<sub>17</sub>O<sub>3</sub><sup>-</sup> [M - H]<sup>-</sup> 185.1183, found 185.1176.

### General procedure for the hydrogenation of the allylic alcohols

To a solution of allylic alcohol (5 mmol) in EtOH (20 mL) and NEt<sub>3</sub> (10 mL) was added Pd/C (100 mg, 5 wt. %) and left to vigorous stirring under a H<sub>2</sub> atmosphere. After complete absorption of H<sub>2</sub> (around 110 mL) the reaction mixture was filtered on a Celite pad. The pad was washed with Et<sub>2</sub>O (2x30 mL) and the solvent was removed under *vacuum* at 30 °C, affording a diastereomeric mixture of *syn* and *anti* hydroxyester as a slightly yellow liquid of sufficient purity for the kinetic study and the resolution. A small amount of pyridine or triethylamine was added to the NMR samples to neutralize the residual acidity of CDCl<sub>3</sub>, which might catalyse the lactonization of hydroxyesters.

**Ethyl-4-hydroxy-3-methylpentanoate (syn-1c + anti-1c)**. Yield= 95% (0.76 g); 93% purity by <sup>1</sup>H-NMR; *syn-1c/anti-1c*, 56:44 by <sup>1</sup>H-NMR; GC (*t*<sub>r</sub> *anti*=10.12 min and *t*<sub>r</sub> *syn* = 10.32 min); <sup>1</sup>H-NMR (400 MHz, CDCl<sub>3</sub>):  $\delta$  4.14 (t, *J* = 7.1, 2H), 3.80 (m, 1H x 0.56), 3.60 (m, 1H x 0.44), 2.55-2.45 (m, 1H), 2.25-2.15 (m, 1H), 2.10-1.93 (m, 1H), 1.83-1.60 (bm, 1H), 1.26 (t,

$J = 7.1$ , 3H), 1.19 (d,  $J = 6.3$ , *anti*-CH<sub>3</sub> 3H x 0.44), 1.15 (d,  $J = 6.3$ , *syn*-CH<sub>3</sub> 3H x 0.56); <sup>13</sup>C-NMR (101 MHz, CDCl<sub>3</sub>):  $\delta = 173.78, 173.67, 71.60, 70.43, 60.40, 60.37, 37.97, 37.76, 37.74, 36.68, 20.80, 19.57, 16.34, 14.38, 14.23$ ; GC-MS:  $m/z$  (%) 145 (M<sup>+</sup>-15, 15), 116 (100), 101 (52), 97 (23).<sup>2</sup>

**Ethyl-4-hydroxy-3,5-dimethylhexanoate (*syn*-1d + *anti*-1d).** Yield= 95% (0.89 g); 94% purity by <sup>1</sup>H-NMR;<sup>3</sup> *syn*-1d/*anti*-1d 55:45 by <sup>1</sup>H-NMR; GC ( $t_r$  *anti* = 11.80 min and  $t_r$  *syn* = 11.89 min; <sup>1</sup>H-NMR (400 MHz, CDCl<sub>3</sub>):  $\delta$  4.13 (t,  $J = 7.1$ , 2H), 3.11 (bm, 1H) 2.58 (dd,  $J = 15.0$  and 4.8, *syn*-CHCO, 0.55H), 2.43 (dd,  $J = 15.0$  and 4.8, *anti*-CHCO, 0.45H), 2.30-2.05 (m, 2H), 1.90-1.63 (m, 2H), 1.26 (t,  $J = 7.1$ , 3H), 1.05-0.85 (m, 9H); <sup>13</sup>C-NMR (101 MHz, CDCl<sub>3</sub>):  $\delta = 174.20, 173.45, 80.31, 79.37, 60.22, 39.47, 37.65, 33.49, 32.44, 31.19, 30.08, 19.95, 19.14, 19.41, 17.16, 15.70, 14.16, 12.53$ ; GC-MS:  $m/z$  (%) 170 (M<sup>+</sup>-18, 2), 145 (M<sup>+</sup>-43, 10), 116 (20), 99 (100); HRMS (ESI) calcd for C<sub>10</sub>H<sub>19</sub>O<sub>3</sub><sup>-</sup> [M - H]<sup>-</sup> 187.1340, found 187.1329.

### Synthesis of *Aerangis* L. 2g and lactones 2h-i

The lactones **2g-2i** were prepared by modifying the Marshall's ozonolysis esterification<sup>4</sup>/lactonization<sup>5</sup> protocol in a multi steps sequence according to the following scheme: *i*) addition of Grignard reagent (PentMgBr, MeMgI or *t*-BuCl) to the cheap commercially available melonal to give the corresponding alcohol, which was submitted to next step without purification; *ii*) ozonolysis in presence of a NaOH solution in methanol followed by acid catalysed ring closure.

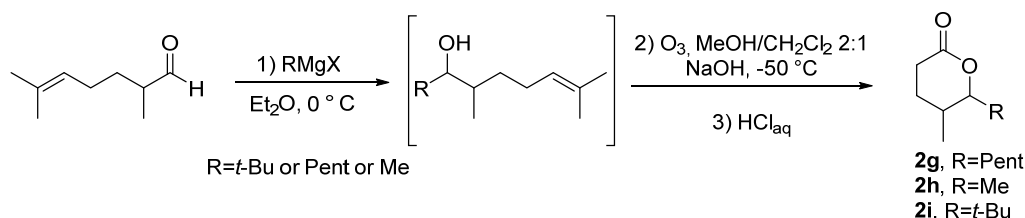

### General procedure for the preparation of $\delta$ -lactones from 2,6-dimethylhept-5-enal (Melonal)

To an ice cooled suspension of a freshly prepared Grignard (0.23 mol) in Et<sub>2</sub>O (100 mL) was slowly added a solution of 2,6-dimethylhept-5-enal (28.0, 0.2 mol) in Et<sub>2</sub>O (75 mL) under a N<sub>2</sub> atmosphere. After complete consumption of 2,6-dimethylhept-5-enal, checked by TLC (*n*-hexane/AcOt, 9:1), the reaction mixture was quenched with a solution of HCl (80 mL, 1.0 M) in ice (200 g), and then diluted with Et<sub>2</sub>O (200 mL). The organic phase was washed with brine (2 x 150 mL, sat.), dried over Na<sub>2</sub>SO<sub>4</sub> and concentrated under reduced pressure to give the carbinol, sufficiently pure to be used for the next step. To a solution of the carbinol in CH<sub>2</sub>Cl<sub>2</sub> (1.0 L) was added a solution of NaOH (1.9 mol, 76.0 g) in MeOH (1 L). To this mixture was bubbled O<sub>3</sub> at -50°C. After 6 hours, the reaction mixture was left to reach room temperature, and it was added H<sub>2</sub>O (300 mL). The biphasic solution was concentrated to a fourth of its volume and left to stir for 12 hours. Then, the aqueous phase was first washed with CH<sub>2</sub>Cl<sub>2</sub> (2x100 mL) and then acidified with a solution of HCl (5.0 M). The aqueous phase was extracted with Et<sub>2</sub>O (4 x 100 mL). The combined organic phases were washed with brine (sat., 100 mL) and dried over Na<sub>2</sub>SO<sub>4</sub>. The solvent was removed under reduced pressure to give a yellow liquid, which was submitted to the distillation procedure affording a colourless liquid.

**5-Methyl-6-pentyltetrahydro-2H-pyran-2-one (*cis*-2g + *trans*-2g).** Yield= 63% (23.2 g); B.p. 160-170 °C, 0.5 mmHg; 96% purity by GC-MS ( $t_r$  *trans* = 18.59 min and  $t_r$  *cis* = 19.01 min); *cis*-2g/*trans*-2g 50:50 by GC-MS. For the <sup>1</sup>H-NMR and the <sup>13</sup>C-NMR chemical shifts see the single diastereoisomers. For the GC-MS fragmentation see the single diastereoisomers.

**5,6-dimethyltetrahydro-2H-pyran-2-one (cis-2h + trans-2h).** Yield= 54% (13.8 g); B.p. 120-130 °C, 0.5 mmHg; 93% purity by GC-MS ( $t_R$  *trans* = 10.61 min and  $t_R$  *cis* = 11.13 min); *cis-2h/trans-2h* 43:57 by GC-MS. For the  $^1\text{H-NMR}$  and the  $^{13}\text{C-NMR}$  chemical shifts see the single diastereoisomers. For the GC-MS fragmentation see the single diastereoisomers.

**6-(*t*-Butyl)-5-methyltetrahydro-2H-pyran-2-one (cis-2i + trans-2i).** Yield= 68% (23.1 g); B.p. 140-145 °C, 0.2 mmHg; 94% purity by GC-MS ( $t_R$  *trans* = 17.61 min and  $t_R$  *cis* = 18.13 min); *cis-2h/trans-2h* 79:21 by GC-MS. For the  $^1\text{H-NMR}$ , the  $^{13}\text{C-NMR}$  and the GC-MS see the single diastereoisomers.

### Synthesis of $\gamma$ -hydroxyesters **1e-f** and $\delta$ -hydroxyesters **1g-1i**

The hydroxyesters **1g-1i** were prepared starting from the corresponding lactones, by a two steps sequence according to the following scheme: *i*) hydrolysis of lactone to give the potassium carboxylate salt, which was submitted to next step without purification; *ii*) treatment with *i*-propyl iodide to give the corresponding ester according to the procedure reported in the article.

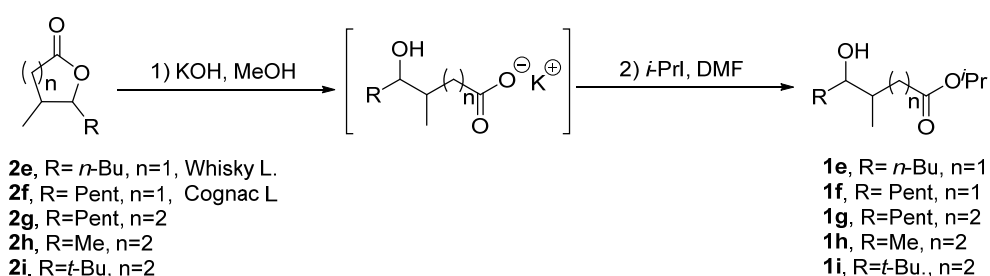

**General procedure.** To an ice cooled and well stirred solution of lactone **2** (17 mmol) in MeOH (30 mL) was added a solution of KOH (19 mmol) in H<sub>2</sub>O (3 mL). The heterogeneous mixture was stirred for 5 hours at room temperature and then concentrated under *vacuum* to give a viscous oil. The latter was treated with Et<sub>2</sub>O (4 x 10 mL) and concentrated under reduced pressure. This procedure was repeated at least 4 times in such a way to eliminate all traces of H<sub>2</sub>O and MeOH. The crude material was left under high *vacuum* for 6 hours. Then, to a solution of the crude mixture in anhydrous DMF (45 mL) was added 2-iodopropane (5.8 g, 34 mmol). After 14 hours, the reaction mixture was diluted with brine (sat., 70 mL) and then extracted with Et<sub>2</sub>O (5 x 40 mL). The combined organic phases were washed with brine (sat., 50 mL), dried over Na<sub>2</sub>SO<sub>4</sub> and concentrated under reduced pressure to give the corresponding hydroxyester **1**,<sup>6</sup> which was of sufficient purity<sup>7</sup> for the next step.

***i*-Propyl-4-hydroxy-3-methyloctanoate (syn-1e + anti-1e).** Yield 92% (3.4 g) as a pale yellow liquid; 98% purity by  $^1\text{H-NMR}$ ;  $^3\text{GC}$  ( $t_R$  *anti* = 17.45 min and  $t_R$  *syn* = 17.54 min); *syn-1e/anti-1e* 50:50 by  $^1\text{H-NMR}$ ;  $^1\text{H-NMR}$  (400 MHz, CDCl<sub>3</sub>):  $\delta$  = 5.02 (m, 1H), 3.56 (m, 0.5H), 3.39 (m, 0.5H), 2.45 (m, 1H), 2.19 (m, 1H), 2.12–1.94 (m, 1H), 1.79 – 1.26 (m, 6H), 1.23 (d,  $J$  = 6.3, 6H), 0.99 – 0.85 (m, 6H);  $^{13}\text{C-NMR}$  (101 MHz, CDCl<sub>3</sub>):  $\delta$  = 173.4, 173.2, 75.1, 74.0, 67.4, 38.7, 37.6, 36.2, 35.4, 33.9, 33.7, 28.4, 27.9, 22.6 (d), 21.6 (d), 16.4 (d), 13.9, 13.4. MS:  $m/z$  (%) 172 [M-44]<sup>+</sup> (2), 157 [M-59]<sup>+</sup> (10), 139 (10), 130 (20), 117 (20), 99 (90), 88 (100).<sup>8</sup>

***i*-Propyl-4-hydroxy-3-methylnonanoate (syn-1f + anti-1f).** Yield 96% (3.8 g); purity 96% by  $^1\text{H-NMR}$ ; GC ( $t_R$  *anti* = 19.46 min and  $t_R$  *syn* = 19.52 min); *syn-1f/anti-1f* 52:48 by  $^1\text{H-NMR}$ ;  $^1\text{H-NMR}$  (400 MHz, CDCl<sub>3</sub>):  $\delta$  = 5.02 (m,  $J$  = 6.2, 1H), 3.56 (m, 0.5H), 3.39 (m, 0.5H), 2.45 (m, 1H), 2.19 (m, 1H), 2.13–1.94 (m, 1H), 1.54–1.19 (m, 14H), 1.09 – 0.87 (m, 6H);  $^{13}\text{C-NMR}$

NMR (101 MHz, CDCl<sub>3</sub>):  $\delta$  = 173.5, 173.2, 75.6, 74.5, 67.7, 39.0, 38.0, 36.4, 35.7, 34.6, 34.3, 32.0 (d), 26.0 (d), 25.6, 22.7, 21.9(d), 16.7, 14.0, 13.7. MS:  $m/z$  (%) 230 [M]<sup>+</sup> (1), 187 (1), 171 (15), 153 (15), 130 (30), 117 (25), 99 (70), 88 (100).<sup>6</sup>

***i*-Propyl-5-hydroxy-4-methyldecanoate (*syn-1g* + *anti-1g*).** Yield 98%; (4.1) g; purity 98% by <sup>1</sup>H-NMR;<sup>3</sup> GC ( $t_R$  *anti* = 20.51 min and  $t_R$  *syn* = 20.57 min); *syn-1g/anti-1g* 58:42 by <sup>1</sup>H-NMR; <sup>1</sup>H-NMR (400 MHz, CDCl<sub>3</sub>):  $\delta$  = 5.01 (m,  $J$  = 6.3, 1H), 3.50 (m, 0.6H), 3.42 (s, 0.4H), 2.44–2.18 (m, 2H), 1.90 – 1.73 (m, 1H), 1.65 – 1.27 (m, 10H), 1.23 (d,  $J$  = 6.2, 6H), 0.90 (d+d, 6H); <sup>13</sup>C-NMR (101 MHz, CDCl<sub>3</sub>):  $\delta$  = 173.7, 75.8, 74.4, 67.6, 38.5, 38.0, 34.5, 33.8, 32.8, 32.5, 32.0, 32.0, 28.6, 27.2, 26.0, 25.7, 22.7, 21.9, 15.4, 14.0, 13.4. MS:  $m/z$  (%) 244 [M]<sup>+</sup> (1), 201 (3), 185 (3), 153 (15), 113 (65), 99 (15); HRMS (ESI) calcd for C<sub>14</sub>H<sub>27</sub>O<sub>3</sub><sup>-</sup> [M – H]<sup>-</sup> 243.1967, found 243.1971.

***i*-Propyl-5-hydroxy-4-methylhexanoate (*syn-1h* + *anti-1h*).** Yield 95%; (3.0) g; purity 98% by <sup>1</sup>H-NMR;<sup>3</sup> GC ( $t_R$  *anti* = 14.02 min and  $t_R$  *syn* = 14.12 min); *syn-1h/anti-1h* 50:50 by <sup>1</sup>H-NMR; <sup>1</sup>H-NMR (400 MHz, CDCl<sub>3</sub>):  $\delta$  = 5.01 (m,  $J$  = 6.3, 1H), 3.72 (m, 0.5H), 3.63 (m, 0.5H), 2.43 – 2.18 (m, 2H), 1.83 (m, 1H), 1.54–1.37 (m, 3H), 1.29–1.08 (m, 9H), 0.97 – 0.78 (m, 3H); <sup>13</sup>C-NMR (101 MHz, CDCl<sub>3</sub>):  $\delta$  = 173.7, 71.4, 70.6, 67.6, 39.9, 39.5, 32.8, 32.5, 27.9, 27.7, 21.9, 20.2, 19.9, 14.8, 14.0. MS:  $m/z$  (%) 189 [M+1]<sup>+</sup> (1), 173 (2), 155 (1), 144 (20), 129 (25), 111 (35), 102 (95), 83 (35), 69 (25), 60 (100). HRMS (ESI) calcd for C<sub>10</sub>H<sub>19</sub>O<sub>3</sub><sup>-</sup> [M – H]<sup>-</sup> 187.1340, found 187.1343.

***i*-Propyl-5-hydroxy-4,6,6-trimethylheptanoate (*syn-1i* + *anti-1i*).** Yield 93%; (3.6) g; purity 94% by <sup>1</sup>H-NMR;<sup>3</sup> GC ( $t_R$  *anti* = 18.02 min and  $t_R$  *syn* = 18.12 min); *syn-1i/anti-1i* 78:22 by <sup>1</sup>H-NMR; <sup>1</sup>H-NMR (400 MHz, CDCl<sub>3</sub>):  $\delta$  = 4.98 (m,  $J$  = 6.3, 1H), 3.16 (m, 0.8H), 3.10 (m, 0.2H), 2.39–2.19 (m, 2H), 1.93 (m, 0.2H), 1.80–1.53 (m, 3.6H), 1.42 – 1.32 (m, 1.2H), 1.37 (d+d, 6H), 0.97–0.88(s+d, 12H); <sup>13</sup>C-NMR (101 MHz, CDCl<sub>3</sub>):  $\delta$  = 173.5, 173.4, 83.9, 81.1, 67.4, 67.3, 35.8, 35.733.6, 33.2, 32.5, 26.7, 26.4, 21.7, 19.9, 13.8; MS:  $m/z$  (%) 230 [M]<sup>+</sup> (1), 213 (4), 198 (15), 153 (22), 130 (30), 117 (25), 99 (70), 88 (100). HRMS (ESI) calcd for C<sub>13</sub>H<sub>25</sub>O<sub>3</sub><sup>-</sup> [M – H]<sup>-</sup> 229.1809, found 229.1803.

## Synthesis of *Trans* lactones

**General procedure A.** To a mixture of *syn/anti* hydroxyester **1** (23.4 mmol) in CH<sub>2</sub>Cl<sub>2</sub> (60 mL) at – 35 °C was added a precooled solution of TFA (0.01 ÷ 0.1 eq) in CH<sub>2</sub>Cl<sub>2</sub> (2 mL) under a N<sub>2</sub> atmosphere. After conversion of most of *anti-1* hydroxyester (checked by <sup>1</sup>H-NMR),<sup>9</sup> the reaction mixture was quenched with imidazole (2.0 eq) and left to reach r.t., then the solvent was removed under reduced pressure to give a crude material, which was left for at least 15 min under high *vacuum*.<sup>10</sup> To a solution of the crude material in CH<sub>2</sub>Cl<sub>2</sub> (30 mL) was added Et<sub>3</sub>SiCl (1.1 eq with respect to the *anti-1*) and a catalytic amount of DMAP. After 12 hours, the reaction mixture was concentrated under reduced pressure and submitted to column chromatography using a gradient elution (SiO<sub>2</sub>, *n*-hexane/AcOt, 95:5->6:4) affording in order of elution the silyl derivative **3** and then *trans-2*, the latter was distilled with a bulb to bulb apparatus. Alternatively, the organic phase was diluted with CH<sub>2</sub>Cl<sub>2</sub> (30 mL), washed with HCl (0.2 M, 2 x 30 mL) and brine (sat., 1 x 30 mL), dried over Na<sub>2</sub>SO<sub>4</sub> and concentrated under *vacuum*. Finally, the lactone was isolated by distillation with a bulb to bulb apparatus.

***Trans-4,5-dimethyldihydrofuran-2(3H)-one (trans-2c).*** Yield= 80% (0.94 g as colourless liquid); B.p. 70-80 °C, 0.5 mmHg; purity 99% by GC ( $t_R$  = 6.58 min); *de* 94% by <sup>1</sup>H-NMR; <sup>1</sup>H-NMR (400 MHz, CDCl<sub>3</sub>):  $\delta$  = 4.15 (tt,  $J$  = 7.1, 5.5, 3H), 2.76 – 2.57 (m, 1H), 2.27 – 2.08 (m, 2H), 1.41 (d,  $J$  = 6.2, 3H), 1.15 (d,  $J$  = 6.2, 3H). <sup>13</sup>C-NMR (101 MHz, CDCl<sub>3</sub>):  $\delta$  = 176.4, 83.5, 38.3, 37.4, 19.2, 16.9.<sup>11</sup> GC-MS:  $m/z$  (%) 114 [M]<sup>+</sup> (10), 99 (20), 70 (60), 55 (50), 42 (100).

***Trans-5-butyl-4-methyldihydrofuran-2(3H)-one (trans-2e, Whisky L).*** Yield= 78% (1.40 g as colourless liquid); B.p. 100-108 °C, 0.5 mmHg; purity 99% by GC ( $t_R$  = 13.81 min); *de* 98% by <sup>1</sup>H-NMR; <sup>1</sup>H-NMR (400 MHz, CDCl<sub>3</sub>)  $\delta$  = 4.01 (td,  $J$  = 7.7, 4.1, 1H), 2.74 – 2.59 (m, 1H), 2.29 – 2.11 (m, 2H), 1.75 – 1.29 (m, 6H), 1.14 (d,  $J$  = 6.5, 3H), 1.05 – 0.88 (t,  $J$  = 7.1, 3H). <sup>13</sup>C-

NMR (101 MHz, CDCl<sub>3</sub>):  $\delta$  = 176.4, 87.5, 37.2, 36.1, 33.8, 27.9, 22.5, 17.6, 13.9. MS:  $m/z$  (%) 156 [M]<sup>+</sup> (2), 138 (3), 128 (2), 114 (5), 99 (100).

**Trans-4-methyl-5-pentylidihydrofuran-2(3H)-one (trans-2f, Cognac L.)**. Yield= 75% (1.44 g as colourless liquid); B.p. 110-118 °C, 0.5 mmHg; purity 98% by GC ( $t_R$  = 16.20 min); *de* 96% by <sup>1</sup>H-NMR; <sup>1</sup>H-NMR (400 MHz, CDCl<sub>3</sub>):  $\delta$  = 4.00 (td,  $J$  = 7.6, 4.1, 1H), 2.74 – 2.56 (m, 1H), 2.29 – 2.08 (m, 2H), 1.72 – 1.29 (m, 9H), 1.13 (d,  $J$  = 7.1, 3H), 0.90 (t,  $J$  = 7.1, 3H). <sup>13</sup>C-NMR (101 MHz, CDCl<sub>3</sub>):  $\delta$  = 176.5, 87.5, 37.2, 36.1, 34.1, 31.7, 25.4, 22.5, 17.6, 14.0. MS:  $m/z$  (%) 170 [M]<sup>+</sup> (2), 152 (3), 142 (5), 128 (10), 110 (10), 99 (100).

**Trans-5-methyl-6-pentyltetrahydro-2H-pyran-2-one (trans-2g, Aerangis L.)**. Yield= 79% (1.43 g as colourless liquid); B.p. 160-170 °C, 0.5 mmHg; purity 99% by GC ( $t_R$  = 18.62 min); *de* 94% by <sup>1</sup>H-NMR; <sup>1</sup>H-NMR (500 MHz, CDCl<sub>3</sub>):  $\delta$  = 3.93 (ddd,  $J$  = 9.8, 7.8, 3.0, 1H), 2.61 (ddd,  $J$  = 17.8, 6.8, 4.6, 1H), 2.46 (ddd,  $J$  = 17.8, 9.8, 7.1, 1H), 1.90 (ddt,  $J$  = 13.5, 7.1, 4.6, 1H), 1.76 – 1.66 (m, 2H), 1.63 – 1.23 (m, 8H), 1.00 (d,  $J$  = 7.2, 3H), 0.89 (d,  $J$  = 7.1 Hz, 3H). <sup>13</sup>C-NMR (126 MHz, CDCl<sub>3</sub>):  $\delta$  = 171.8, 85.8, 33.5, 32.2, 31.7, 29.5, 27.8, 24.2, 22.5, 17.4, 14.0. MS:  $m/z$  (%) 184 [M]<sup>+</sup> (1), 156 (3), 148 (3), 128 (10), 113 (65), 99 (15), 84 (70), 69 (10), 56 (100).

**Trans-5-methyl-6-methyltetrahydro-2H-pyran-2-one (trans-2h)**. Yield= 83% (1.24 g as colourless liquid, at T>15°C, as a colorless needle crystals); B.p. 120-130°C, 0.6 mmHg; purity 99% by GC ( $t_R$  = 9.77 min); *de* 92% by <sup>1</sup>H-NMR; <sup>1</sup>H-NMR (400 MHz, CDCl<sub>3</sub>):  $\delta$  = 4.04 (dq,  $J$  = 9.4, 6.3, 1H), 2.62 (ddd,  $J$  = 17.7, 6.7, 4.3, 1H), 2.47 (ddd,  $J$  = 17.7, 9.7, 7.1, 1H), 1.90 (ddt,  $J$  = 13.2, 7.2, 4.2, 1H), 1.73 – 1.46 (m, 2H), 1.37 (d,  $J$  = 7.1, 3H), 1.01 (d,  $J$  = 6.5 Hz, 3H). <sup>13</sup>C NMR (101 MHz, CDCl<sub>3</sub>):  $\delta$  = 171.6, 82.4, 34.7, 29.7, 28.0, 20.0, 17.4. MS:  $m/z$  (%) 128 [M]<sup>+</sup> (5), 113 (5), 99 (2), 84 (40), 69 (10), 56 (100).

**Trans-4 6-(*t*-butyl)-5-methyltetrahydro-2H-pyran-2-one (trans-2i)**. Yield= 90% (0.79 g as colourless liquid); B.p. 140-145 °C, 0.2 mmHg; purity 99% by GC ( $t_R$  = 17.61 min); *de* 92% by <sup>1</sup>H-NMR; <sup>1</sup>H-NMR (400 MHz, CDCl<sub>3</sub>):  $\delta$  = 3.69 (d,  $J$  = 7.2, 1H), 2.47 (ddd,  $J$  = 17.0, 8.2, 4.3, 1H), 2.33 (ddd,  $J$  = 17.0, 8.2, 4.3, 1H), 2.02 (m,  $J$  = 6.2, 1H), 1.85 (m, 1H), 1.65 – 1.53 (m, 1H), 1.13 (d,  $J$  = 6.6, 3H), 1.00 (s, 9H). <sup>13</sup>C NMR (101 MHz, CDCl<sub>3</sub>):  $\delta$  = 173.0, 92.6, 36.2, 28.7, 27.9, 27.8, 26.0, 21.4. MS:  $m/z$  (%) 170 [M]<sup>+</sup> (5), 155 (8), 98 (40), 56 (100).

### Synthesis of (*syn*)-silyl ethers

This procedure is similar to that of procedure A, unless a different amount of TFA (0.15 eq) was used, and the conversion of **1** into **2** was pushed until the consumption of most of *anti*-**1** (checked by <sup>1</sup>H-NMR),<sup>9</sup> the O-silylation was carried out at same conditions described for the procedure A.

**(*syn*)-Ethyl 3-methyl-4-((triethylsilyl)oxy)pentanoate (3c)**. Yield 78% (2.8 g as a colorless liquid); purity 98% by GC ( $t_R$  = 18.91 min); *de* 99% by <sup>1</sup>H NMR; <sup>1</sup>H NMR (400 MHz, CDCl<sub>3</sub>):  $\delta$  = 4.14 (q,  $J$  = 7.1, 2H), 3.81 (qd,  $J$  = 6.3, 3.5, 1H), 2.59 – 2.46 (m, 1H), 2.14 – 2.00 (m, 2H), 1.27 (t,  $J$  = 7.2, 3H), 1.09 (d,  $J$  = 6.3, 3H), 1.04 – 0.86 (m, 15H), 0.60 (td,  $J$  = 8.3, 7.7, 7H). <sup>13</sup>C-NMR (101 MHz, CDCl<sub>3</sub>):  $\delta$  = 173.7, 70.8, 60.1, 37.5, 37.4, 20.0, 14.7, 14.3, 6.9, 5.2. GC-MS:  $m/z$  (%) 273 [M-1]<sup>+</sup> (1), 259 (2), 245 (100); HRMS (quadrupole) calcd for C<sub>12</sub>H<sub>25</sub>O<sub>3</sub>Si<sup>+</sup> [M - Et]<sup>+</sup> 245.1573, found 245.1572.

**(*syn*)-Isopropyl 3-methyl-4-((triethylsilyl)oxy)octanoate (3e)**. Yield 77% (3.0 g as a colorless liquid); purity 98% by GC ( $t_R$  = 23.01 min); *de* 99% by <sup>1</sup>H-NMR; <sup>1</sup>H-NMR (400 MHz, CDCl<sub>3</sub>):  $\delta$  = 5.01 (m,  $J$  = 6.3, 1H), 3.60 (td,  $J$  = 6.1, 3.0, 1H), 2.51 – 2.41 (m, 1H), 2.15 – 1.97 (m, 2H), 1.56 – 1.15 (m, 15H), 1.06 – 0.79 (m, 16H), 0.60 (q,  $J$  = 7.9, 6H); <sup>13</sup>C NMR (101 MHz, CDCl<sub>3</sub>):  $\delta$  = 173.3, 75.3, 67.4, 38.1, 35.4, 33.4, 28.4, 23.0, 22.0, 21.9, 14.3, 14.1, 7.0, 5.4. MS:  $m/z$  (%) 329 [M-1]<sup>+</sup> (1), 301 (10), 271 (13), 259 (100); HRMS (quadrupole) calcd for C<sub>16</sub>H<sub>33</sub>O<sub>3</sub>Si<sup>+</sup> [M - Et]<sup>+</sup> 301.2204, found 301.2207.

**(syn)-Isopropyl 3-methyl-4-((triethylsilyl)oxy)nonanoate (3f).** Yield 78% (3.3 as a colourless liquid); purity 94% by GC ( $t_R$  = 24.97 min); *de* 98% by  $^1\text{H-NMR}$ ;  $^1\text{H-NMR}$  (400 MHz,  $\text{CDCl}_3$ ):  $\delta$  = 5.00 (m,  $J$  = 6.2, 1H), 3.53 (td,  $J$  = 6.1, 3.3, 1H), 2.44 – 2.09 (m, 2H), 1.78 (dddd,  $J$  = 13.1, 10.3, 6.3, 4.3, 1H), 1.55 – 1.19 (m, 14H), 1.01 – 0.79 (m, 15H), 0.58 (q,  $J$  = 7.9, 6H);  $^{13}\text{C-NMR}$  (101 MHz,  $\text{CDCl}_3$ ):  $\delta$  = 173.3, 75.3, 67.4, 38.1, 35.4, 33.7, 32.2, 25.8, 22.8, 22.0, 21.9, 14.3, 14.1, 7.0, 5.4. MS:  $m/z$  (%) 329  $[\text{M}-29]^+$  (15), 299 (15), 287 (20), 269 (100); HRMS (quadrupole) calcd for  $\text{C}_{17}\text{H}_{35}\text{O}_3\text{Si}^+ [\text{M} - \text{Et}]^+$  315.2361, found 315.2369.

**(syn)-Isopropyl 4-methyl-5-((triethylsilyl)oxy)decanoate (3g).** Yield 78% (3.8 g as colourless liquid); purity 98% by GC ( $t_R$  = 24.97 min); *de* 98% by  $^1\text{H-NMR}$ ;  $^1\text{H-NMR}$  (400 MHz,  $\text{CDCl}_3$ ):  $\delta$  = 5.00 (m,  $J$  = 6.2, 1H), 3.53 (td,  $J$  = 6.1, 3.3, 1H), 2.44 – 2.09 (m, 2H), 1.78 (dddd,  $J$  = 13.1, 10.3, 6.3, 4.3, 1H), 1.55 – 1.19 (m, 16H), 1.01 – 0.79 (m, 16H), 0.58 (q,  $J$  = 7.9, 6H).  $^{13}\text{C-NMR}$  (101 MHz,  $\text{CDCl}_3$ ):  $\delta$  = 173.5, 75.8, 67.3, 37.4, 33.6, 33.1, 32.0, 28.1, 25.6, 22.6, 21.8, 14.0, 13.9, 7.0, 5.2. MS:  $m/z$  (%) 329  $[\text{M}-29]^+$  (15), 299 (15), 287 (20), 269 (100).  $\delta$  = 4; HRMS (quadrupole) calcd for  $\text{C}_{18}\text{H}_{37}\text{O}_3\text{Si}^+ [\text{M} - \text{Et}]^+$  329.2506, found 329.2514.

**(syn)-Isopropyl 4-methyl-5-((triethylsilyl)oxy)hexanoate (3h).** Yield 82% (2.9 g as colourless liquid); purity 96% by GC ( $t_R$  = 21.82 min); *de* 97% by  $^1\text{H-NMR}$ ;  $^1\text{H-NMR}$  (400 MHz,  $\text{CDCl}_3$ ):  $\delta$  = 5.00 (m,  $J$  = 6.3, 1H), 3.72 (qd,  $J$  = 6.2, 3.8, 1H), 2.40 – 2.19 (m, 2H), 1.87 – 1.74 (m, 1H), 1.43 (tdd,  $J$  = 11.8, 5.7, 2.7 Hz, 2H), 1.23 (d,  $J$  = 6.3, 6H), 1.09 (d,  $J$  = 6.2, 3H), 0.96 (t,  $J$  = 7.9 Hz, 9H), 0.88 – 0.83 (m, 3H), 0.59 (q,  $J$  = 7.6, 6H).  $^{13}\text{C-NMR}$  (101 MHz,  $\text{CDCl}_3$ ):  $\delta$  = 173.7, 71.7, 67.4, 40.1, 33.1, 28.0, 22.0, 20.5, 14.6, 7.0, 5.3. MS:  $m/z$  (%) 301  $[\text{M}-1]^+$  (1), 287 (1), 273 (10), 243 (15), 231 (20), 213 (100); HRMS (quadrupole) calcd for  $\text{C}_{14}\text{H}_{29}\text{O}_3\text{Si}^+ [\text{M} - \text{Et}]^+$  273.1880, found 273.1887.

## Synthesis of (syn)-1i

This procedure is similar to that of procedure B, but, since the hydroxyester *syn-1i* is sufficiently stable at room temperature no *O*-silylation was carried out.

**(syn)-Isopropyl -5-hydroxy-4,6,6-trimethylheptanoate (1i).** Yield 82% (3.7 g as colourless liquid); purity 96% by GC ( $t_R$  = 18.14 min); *de* 97% by  $^1\text{H-NMR}$ ;  $^1\text{H-NMR}$  (400 MHz,  $\text{CDCl}_3$ ):  $\delta$  = 4.98 (m,  $J$  = 6.3, 1H), 3.16 (m, 1H), 2.38 – 2.19 (m, 2H), 1.78 – 1.54 (m, 3H), 1.37 (m, 1H), 1.23 (d,  $J$  = 6.3, 6H), 0.91 (d+t, 9H);  $^{13}\text{C-NMR}$  (101 MHz,  $\text{CDCl}_3$ ):  $\delta$  = 173.4, 81.1, 67.4, 35.8, 33.2, 32.3 (d), 26.7, 21.7, 13.8.

## General procedure for the synthesis of *cis* lactones

To a solution of **3** or *syn-1i* (10.0 mmol) in  $\text{CH}_2\text{Cl}_2$  (15 mL) was added TFA (1 g, 0.1 g for **1i**). After complete conversion of starting material into *cis-2*, checked by TLC, the reaction mixture was diluted with  $\text{Et}_2\text{O}$  (15 mL) and washed with a solution of  $\text{NaHCO}_3$  (sat., 1 x 30 mL), brine (sat., 1 x 20 mL). The organic phase was dried over  $\text{Na}_2\text{SO}_4$ , concentrated under reduced pressure and the crud material was submitted to the bulb to bulb distillation apparatus affording the *cis*-lactone.

**Cis-4,5-dimethyldihydrofuran-2(3H)-one (cis-2c).** Yield=89% (1.0 g as a colourless liquid); B.p. 73-81 °C, 0.5 mmHg; purity 98% by GC ( $t_R$  = 7.34 min); *de* 99% by  $^1\text{H-NMR}$ ;  $^1\text{H-NMR}$  (400 MHz,  $\text{CDCl}_3$ ):  $\delta$  = 4.65 (m, 1H), 2.75 – 2.52 (m, 2H), 2.21 (dd,  $J$  = 16.6, 5.1, 1H), 1.29 (d,  $J$  = 6.5, 3H), 1.03 (d,  $J$  = 6.9, 3H).  $^{13}\text{C-NMR}$  (101 MHz,  $\text{CDCl}_3$ ):  $\delta$  = 176.8, 79.7, 37.0, 33.5, 15.5, 14.0. MS:  $m/z$  (%) 114  $[\text{M}]^+$  (10), 99 (20), 70 (60), 55 (50), 42 (100).<sup>11</sup>

**Cis-5-butyl-4-methyldihydrofuran-2(3H)-one (cis-2e, Whisky L.).** Yield= 91% (1.4 g as a colourless liquid); B.p. 100-110°C, 0.5 mmHg; purity 99% by GC ( $t_R$  = 14.59 min); *de* 99% by  $^1\text{H-NMR}$ ;  $^1\text{H-NMR}$  (400 MHz,  $\text{CDCl}_3$ ):  $\delta$  = 4.42 (m, 1H), 2.68 (dd,  $J$  = 16.9, 7.8, 1H), 2.65 (m, 1H), 2.19 (dd,  $J$  = 16.9, 4.0, 1H), 1.72 – 1.31 (m, 6H), 1.01 (d,  $J$  = 7.0, 3H), 0.97 – 0.87



(t,  $J = 7.0$ , 3H).  $^{13}\text{C-NMR}$  (101 MHz,  $\text{CDCl}_3$ ):  $\delta = 176.8, 83.8, 37.7, 33.2, 29.7, 28.2, 22.6, 14.0, 13.9$ . MS:  $m/z$  (%) 156 [ $\text{M}$ ] $^+$  (2), 138 (3), 128 (2), 114 (5), 99 (100).

***Cis-4-methyl-5-pentylidihydrofuran-2(3H)-one (cis-2f, Cognac L.)***. Yield= 91% (1.6 g as a colourless liquid); B.p. 110-118°C, 0.5 mmHg; purity 98% by GC ( $t_{\text{R}} = 17.14$  min); *de* 98% by  $^1\text{H-NMR}$ ;  $^1\text{H-NMR}$  (400 MHz,  $\text{CDCl}_3$ ):  $\delta = 4.42$  (m, 1H), 2.68 (dd,  $J = 16.9, 7.8$ , 1H), 2.63 – 2.49 (m, 1H), 2.24 (dd,  $J = 16.9, 4.0$ , 1H), 1.71 – 1.31 (m, 7H), 1.01 (d,  $J = 7.0$ , 3H), 0.94 – 0.83 (t,  $J = 7.0$ , 3H).  $^{13}\text{C-NMR}$  (101 MHz,  $\text{CDCl}_3$ ):  $\delta = 176.7, 83.6, 37.5, 33.0, 31.5, 29.8, 25.5, 22.4, 13.9, 13.8$ . MS:  $m/z$  (%) 170 [ $\text{M}$ ] $^+$  (2), 152 (3), 142 (5), 128 (10), 110 (10), 99 (100).

***Cis-5-methyl-6-pentyltetrahydro-2H-pyran-2-one (cis-2g, Aerangis L.)***. Yield= 90% (1.7 g as a colourless liquid); B.p. 160-170 °C, 0.5 mmHg; purity 98% by GC ( $t_{\text{R}} = 19.05$  min); *de* 98% by  $^1\text{H-NMR}$ ;  $^1\text{H-NMR}$  (400 MHz,  $\text{CDCl}_3$ ):  $\delta = 4.29$  (m, 1H), 2.54 (dd,  $J = 7.9, 6.6$ , 2H), 2.11 – 1.94 (m, 2H), 1.77 – 1.22 (m, 9H), 0.97 (d,  $J = 6.9$ , 3H), 0.90 (t,  $J = 6.9$ , 3H).  $^{13}\text{C-NMR}$  (101 MHz,  $\text{CDCl}_3$ ):  $\delta = 172.2, 83.1, 32.0, 31.7, 29.3, 26.8, 26.1, 25.3, 22.6, 14.0, 12.5$ . MS:  $m/z$  (%) 184 [ $\text{M}$ ] $^+$  (1), 156 (3), 148 (3), 128 (10), 113 (65), 99 (15), 84 (70), 69 (10), 56 (100).

***Cis-5,6-dimethyltetrahydro-2H-pyran-2-one (cis-2h)***. Yield= 85% (1.1 g as a colourless liquid); B.p. 120-130°C, 0.5 mmHg; purity 98% by GC ( $t_{\text{R}} = 10.43$  min); *de* 98% by  $^1\text{H-NMR}$ ;  $^1\text{H-NMR}$  (400 MHz,  $\text{CDCl}_3$ ):  $\delta = 4.52$  (m, 1H), 2.63 – 2.42 (m, 2H), 2.11 – 1.90 (m, 2H), 1.76 – 1.62 (m, 1H), 1.30 (d,  $J = 6.6$ , 3H), 0.98 (d,  $J = 7.0$ , 3H).  $^{13}\text{C-NMR}$  (101 MHz,  $\text{CDCl}_3$ ):  $\delta = 171.5, 79.0, 30.5, 27.1, 25.4, 17.2, 13.1$ . MS:  $m/z$  (%) 128 [ $\text{M}$ ] $^+$  (5), 113 (5), 99 (2), 84 (40), 69 (10), 56 (100).

***Cis-4-(*t*-butyl)-5-methyltetrahydro-2H-pyran-2-one (cis-2i)***. Yield= 94% (1.6 g as a colourless liquid); purity 98% by GC ( $t_{\text{R}} = 18.13$  min); *de* 98% by  $^1\text{H-NMR}$ ;  $^1\text{H-NMR}$  (400 MHz,  $\text{CDCl}_3$ ):  $\delta = 3.92$  (d,  $J = 2.1$ , 1H), 2.55 – 2.48 (m, 2H), 2.24 (m, 2H), 2.01 (m, 2H), 1.62 (m, 1H), 0.98 (d+s, 12H).  $^{13}\text{C-NMR}$  (101 MHz,  $\text{CDCl}_3$ ):  $\delta = 171.2, 90.7, 34.6, 28.5, 27.5, 26.5, 25.8, 13.2$ . MS:  $m/z$  (%) 170 [ $\text{M}$ ] $^+$  (5), 155 (8), 98 (40), 56 (100).

Copy of <sup>1</sup>H- and <sup>13</sup>C- NMR spectra

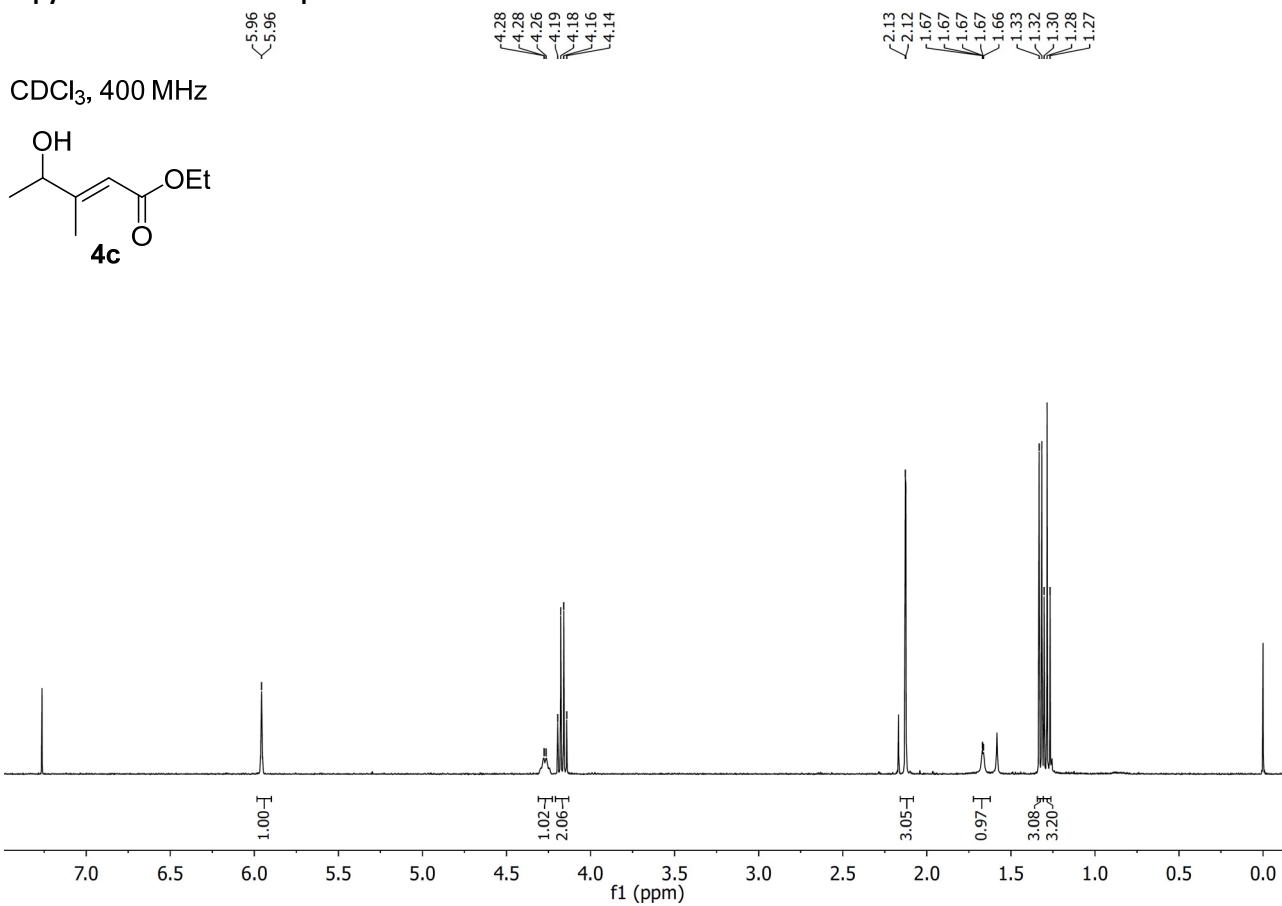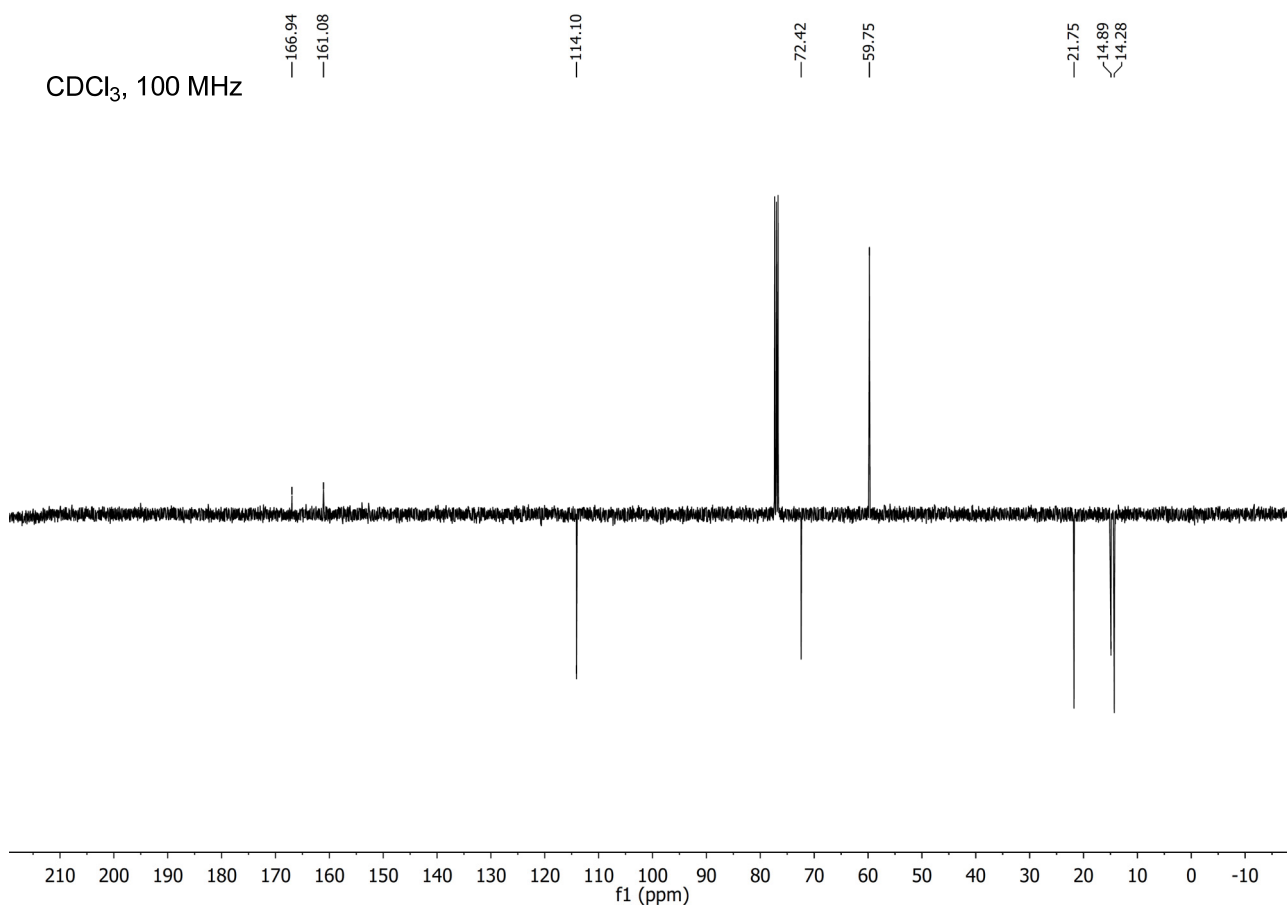

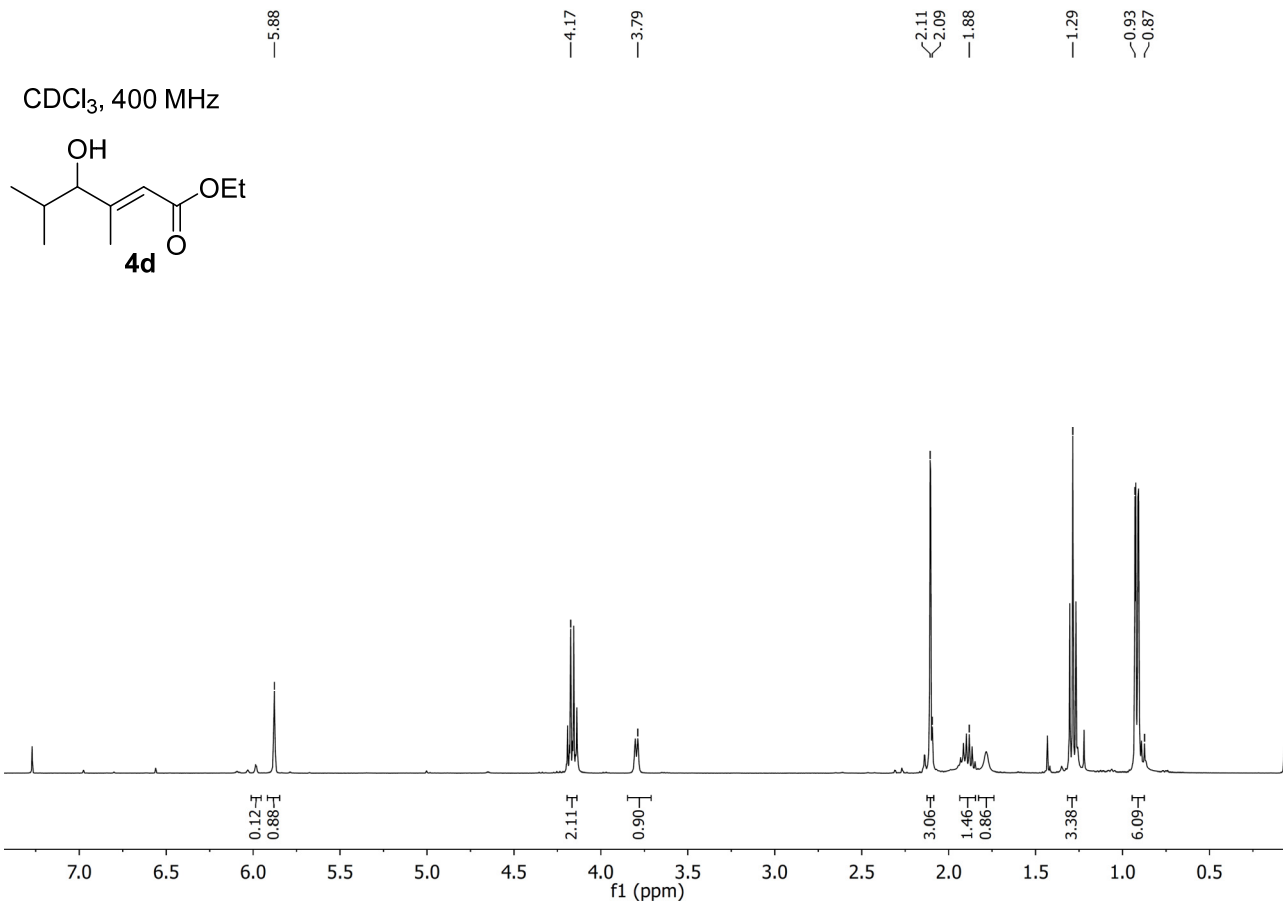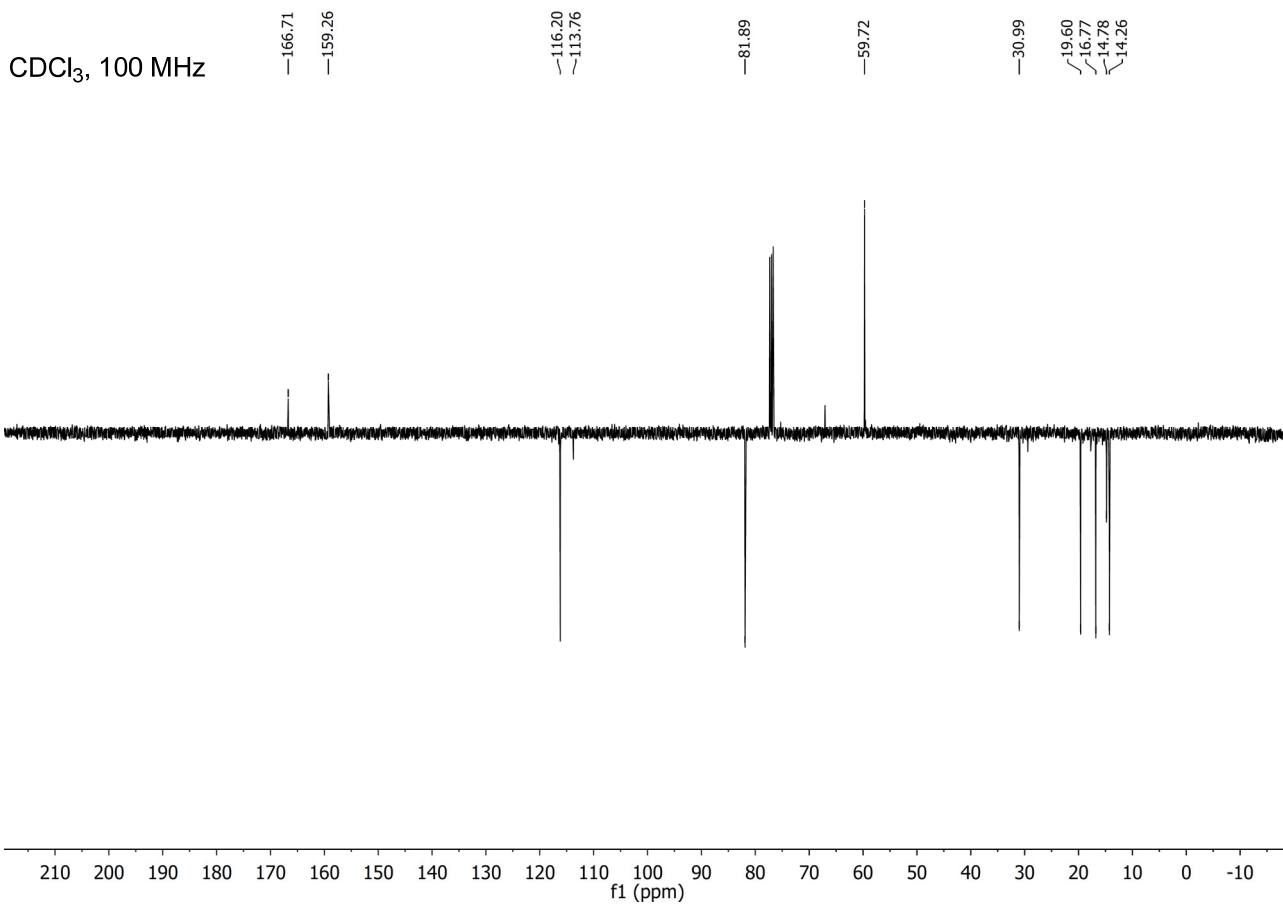

CDCl<sub>3</sub>, 400 MHz

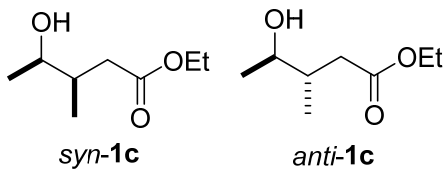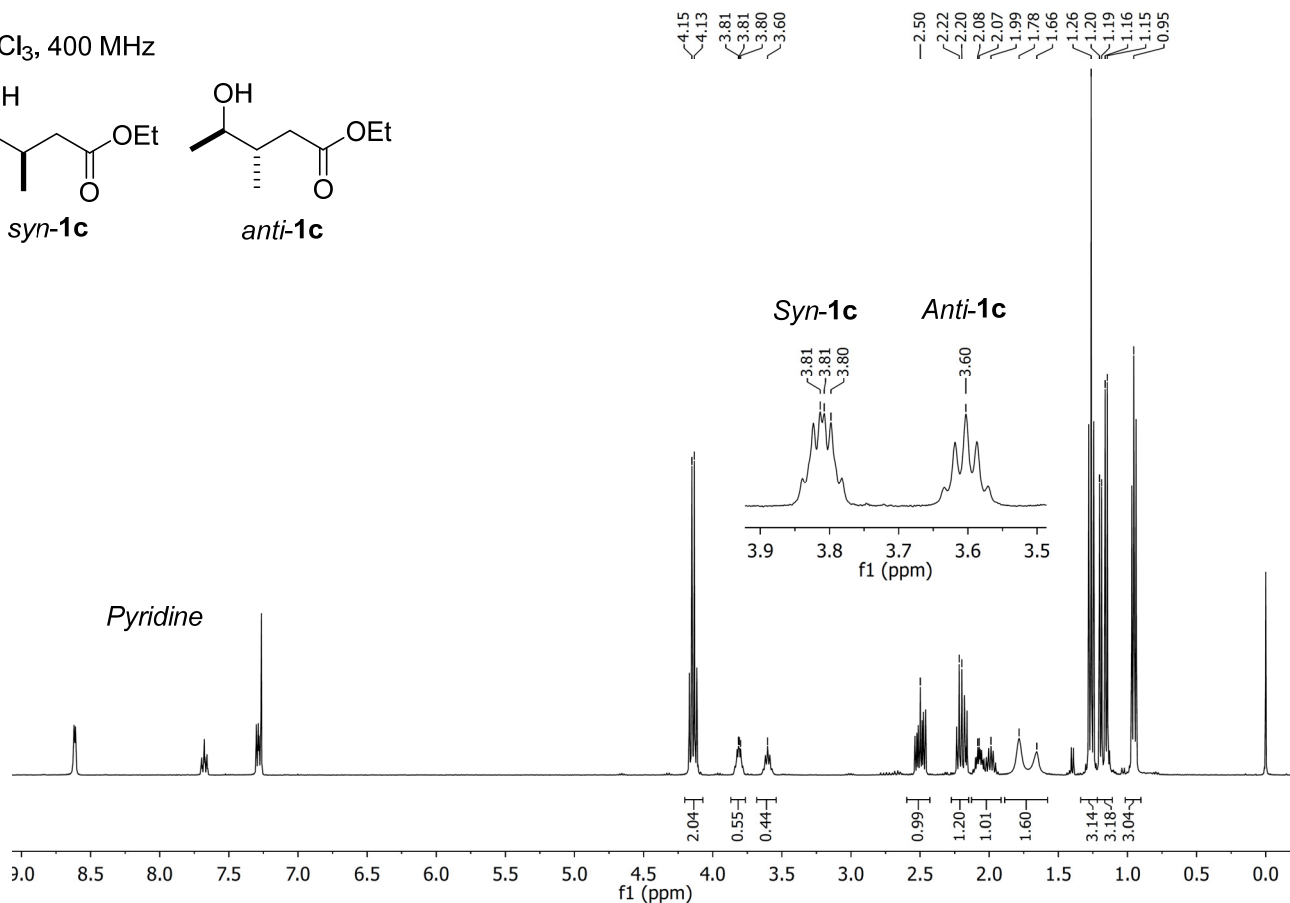

CDCl<sub>3</sub>, 100 MHz

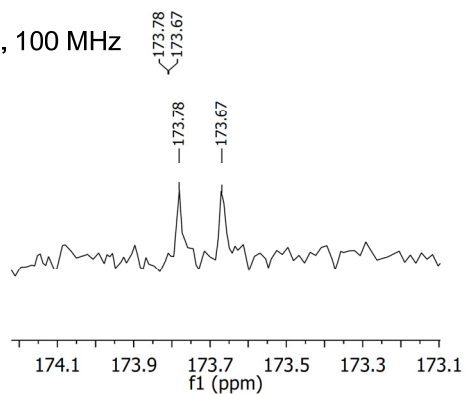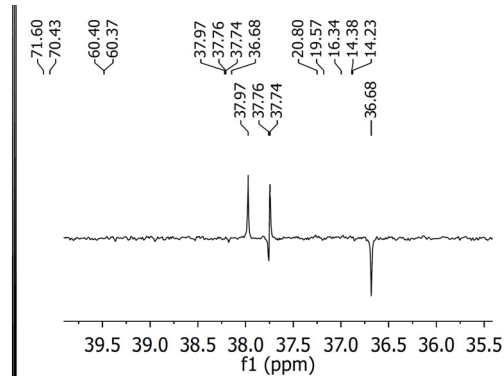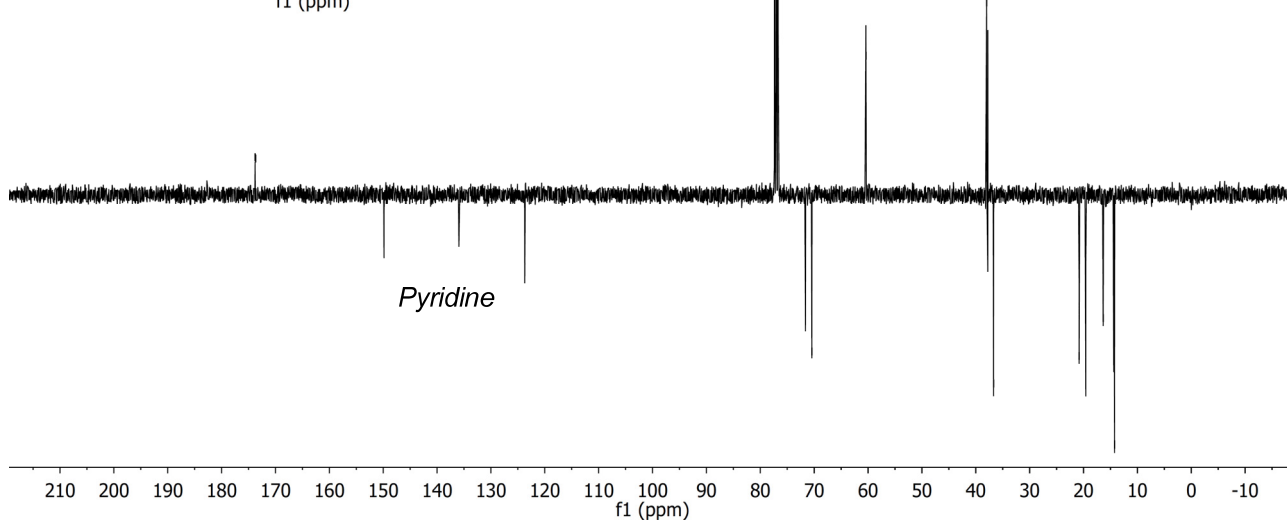

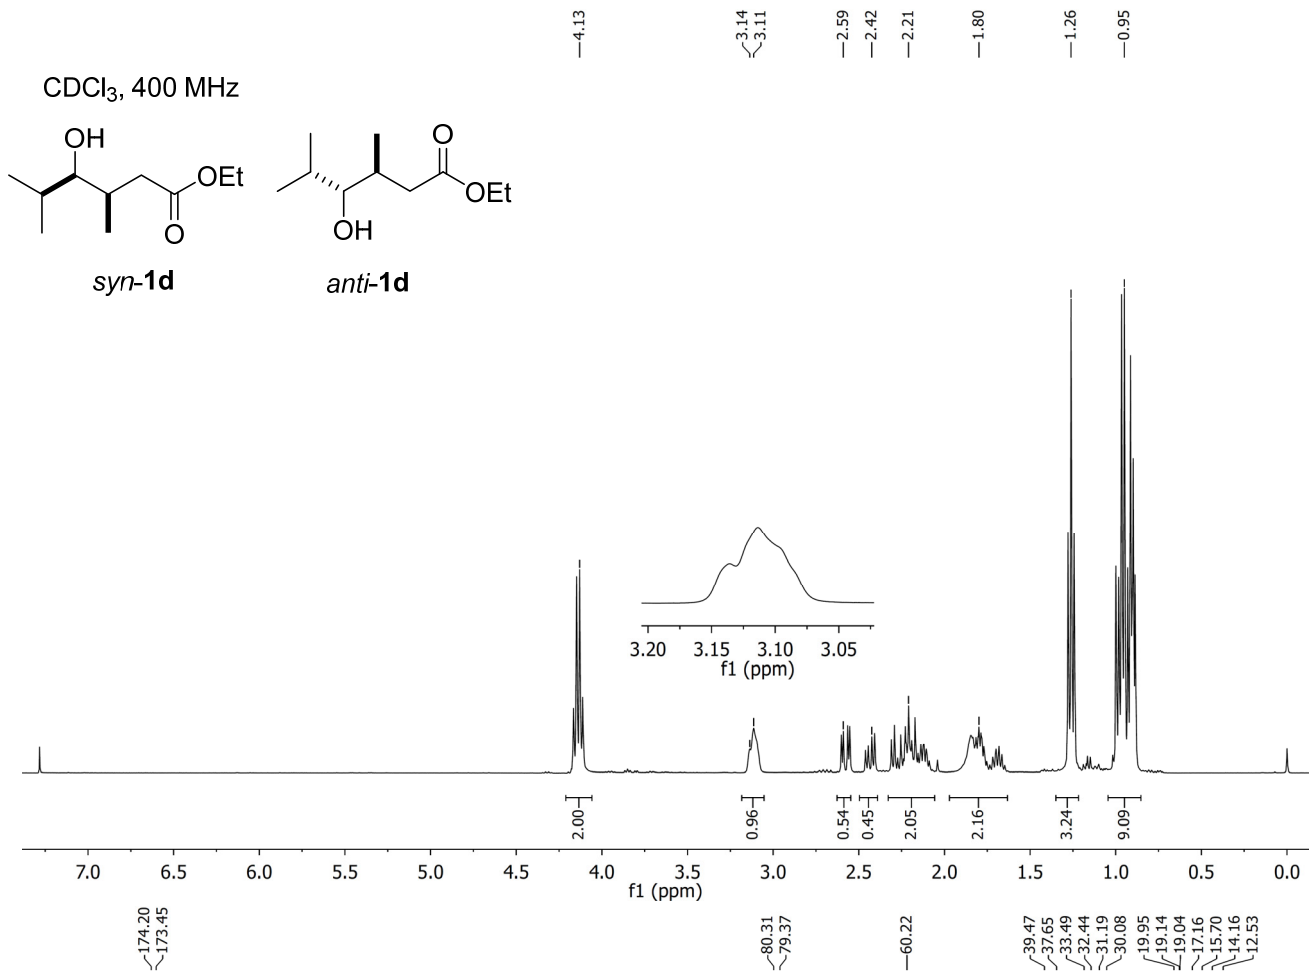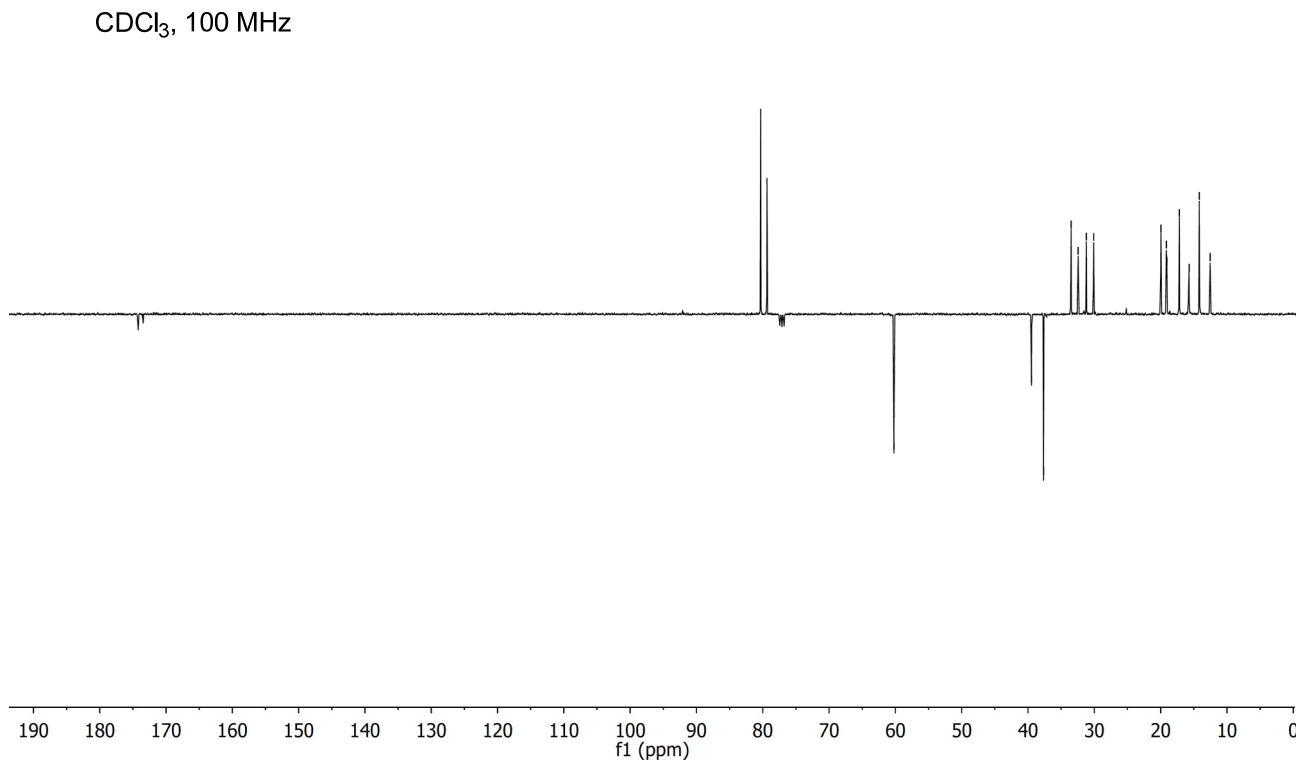

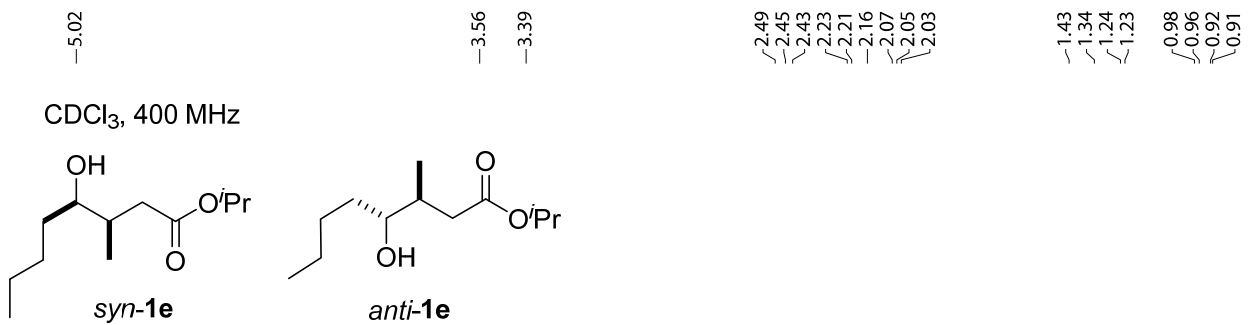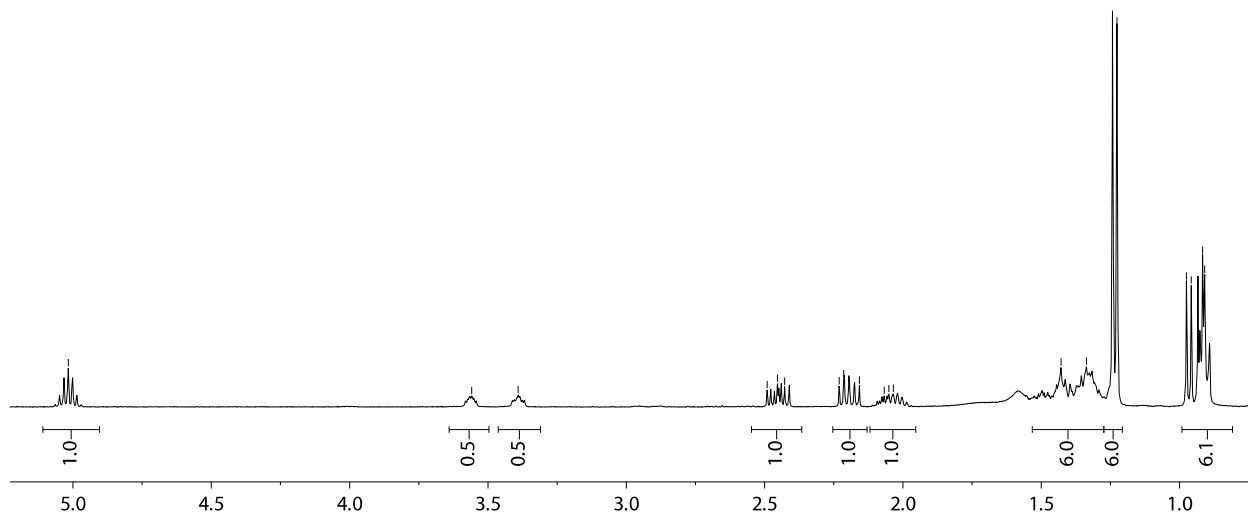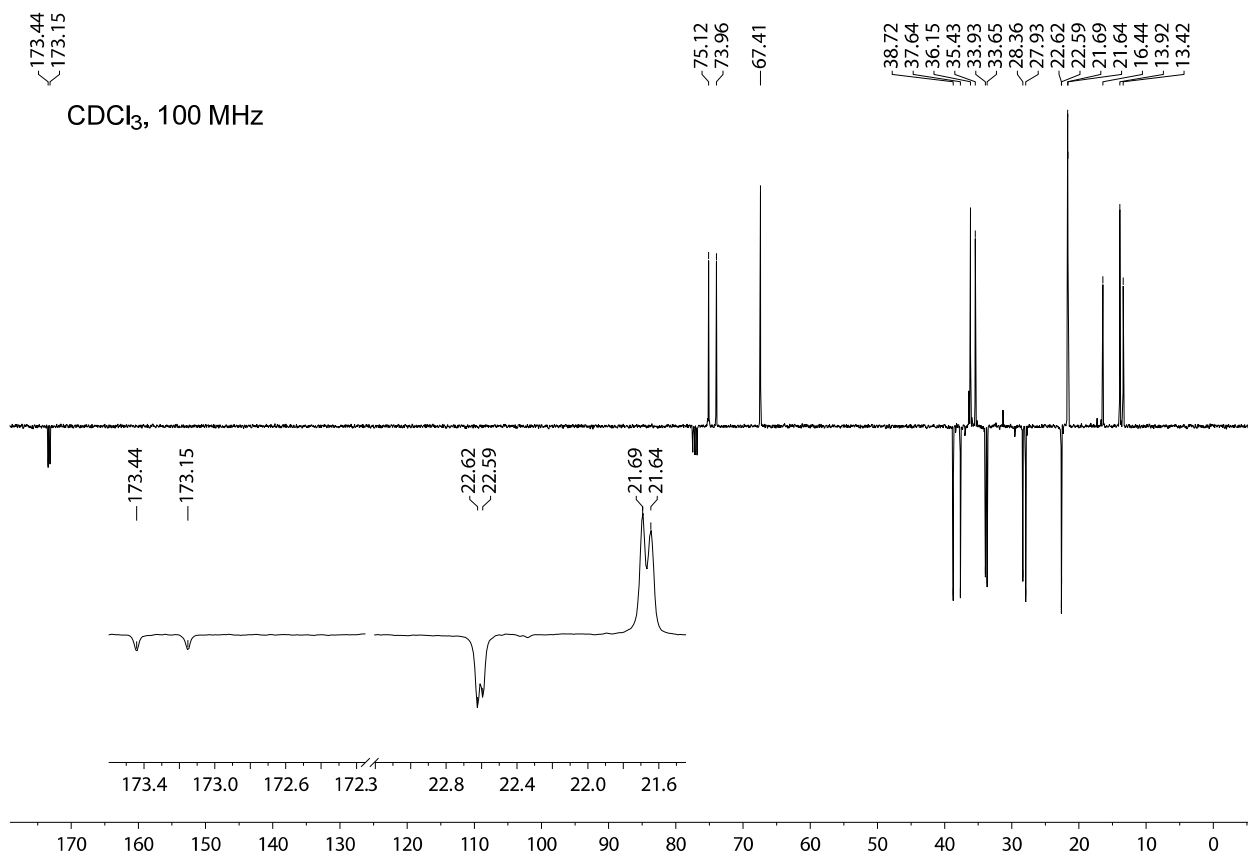

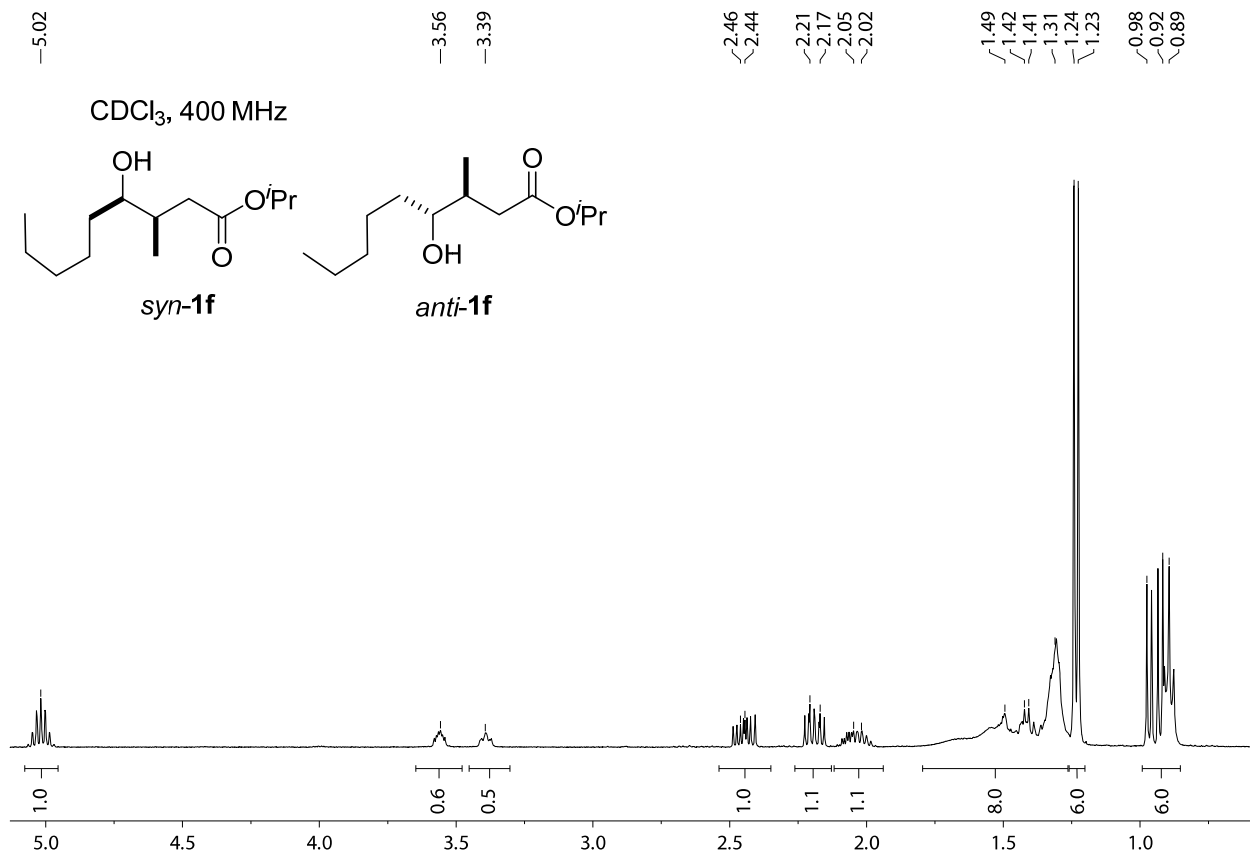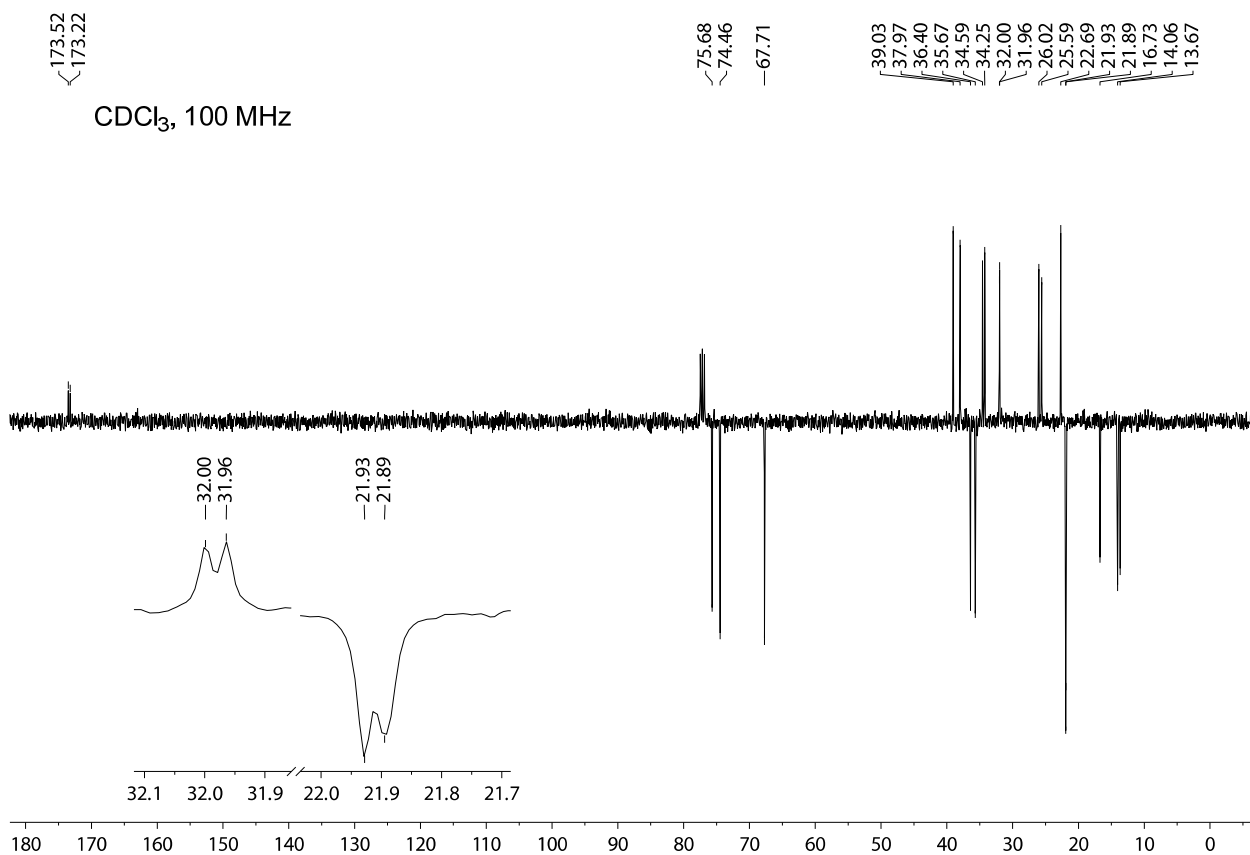

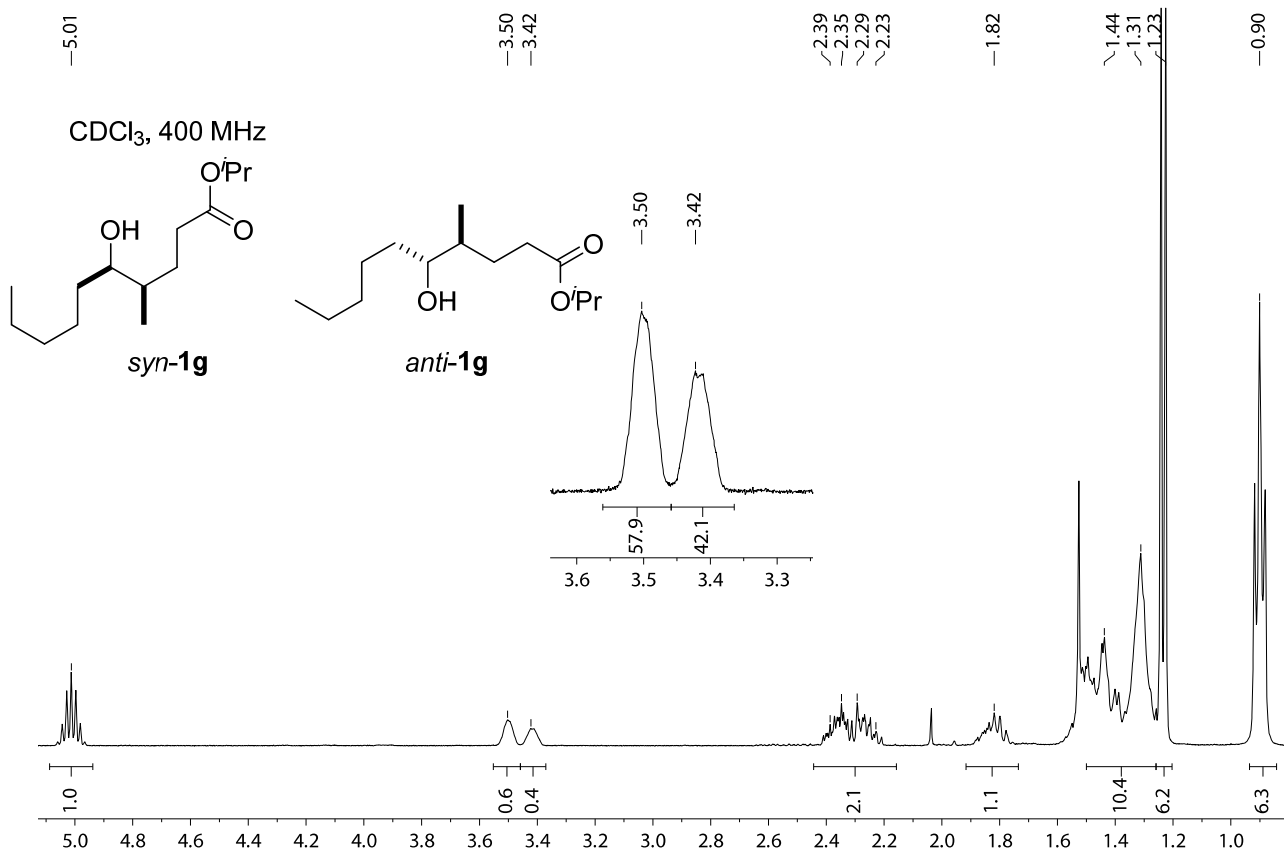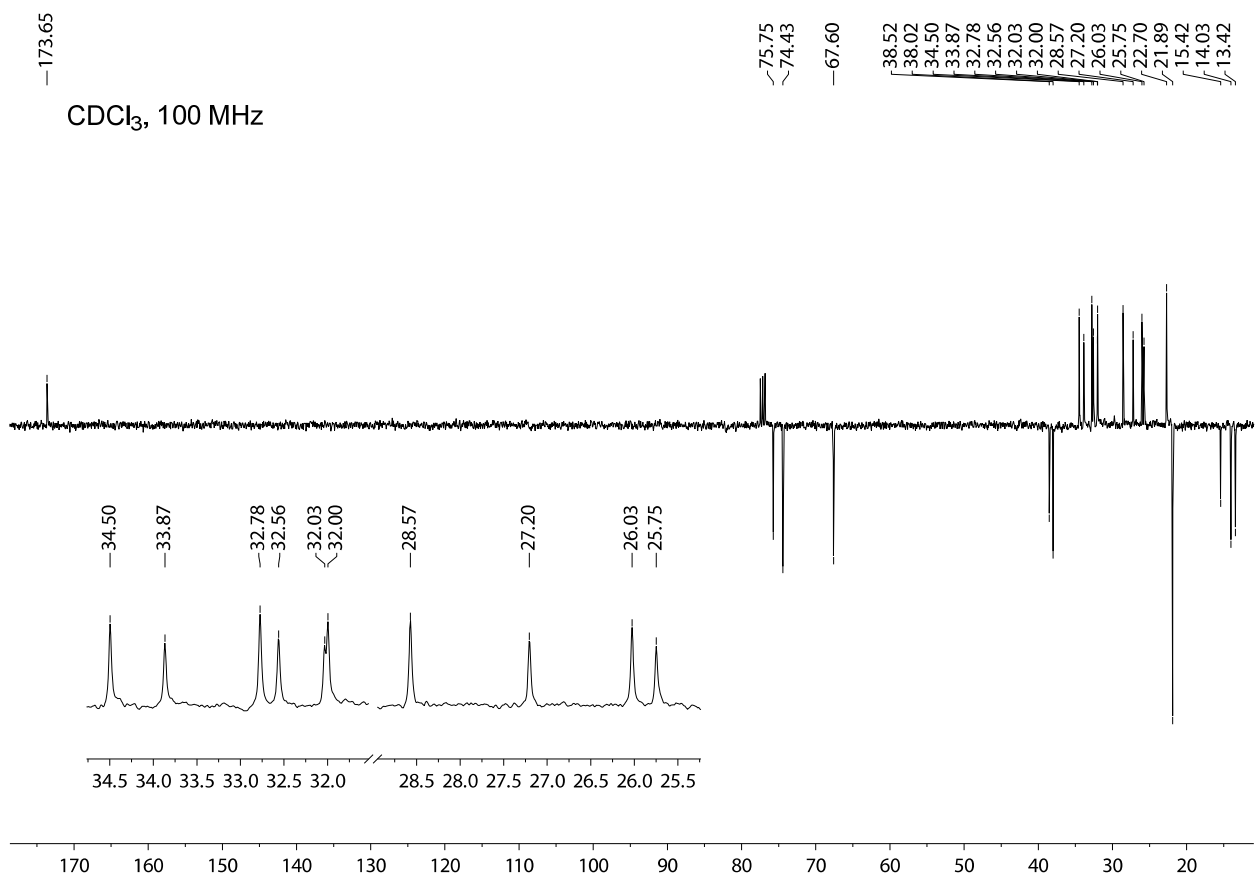



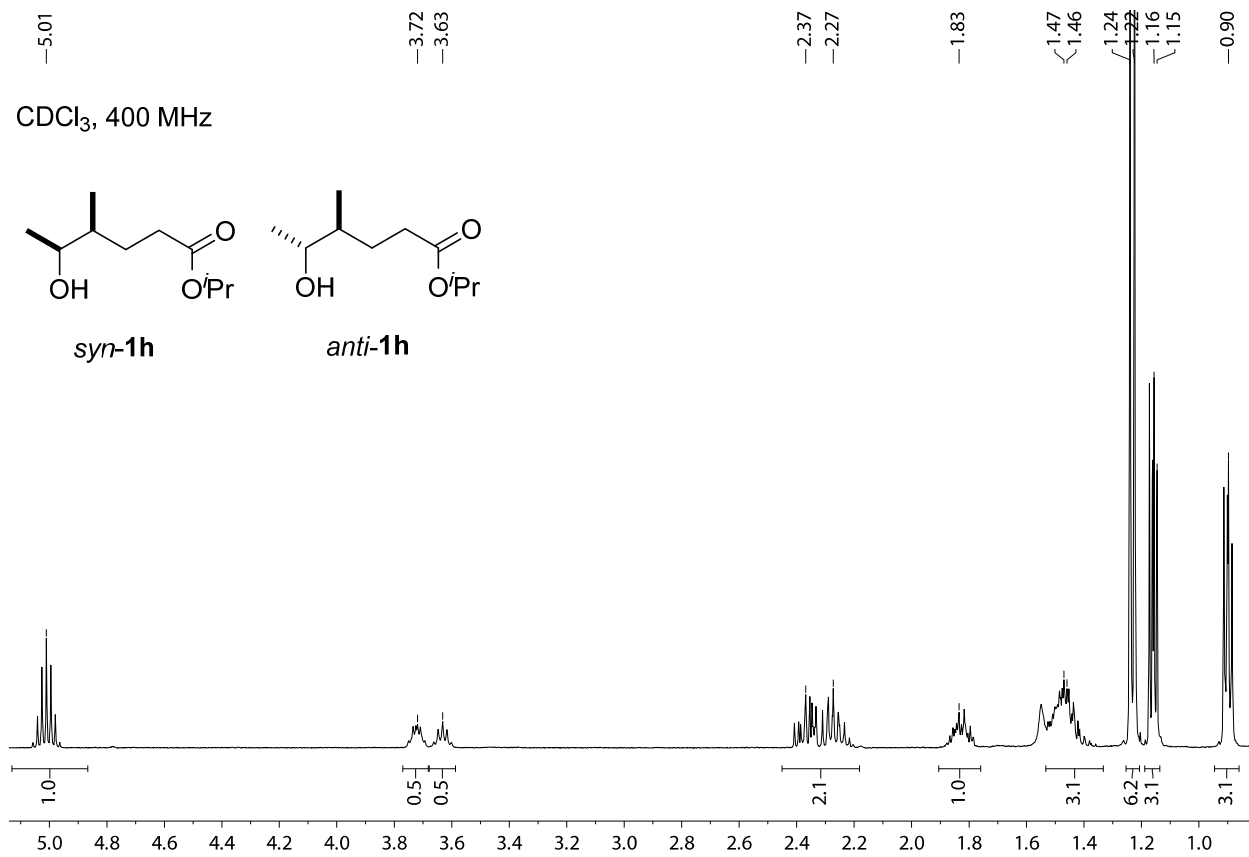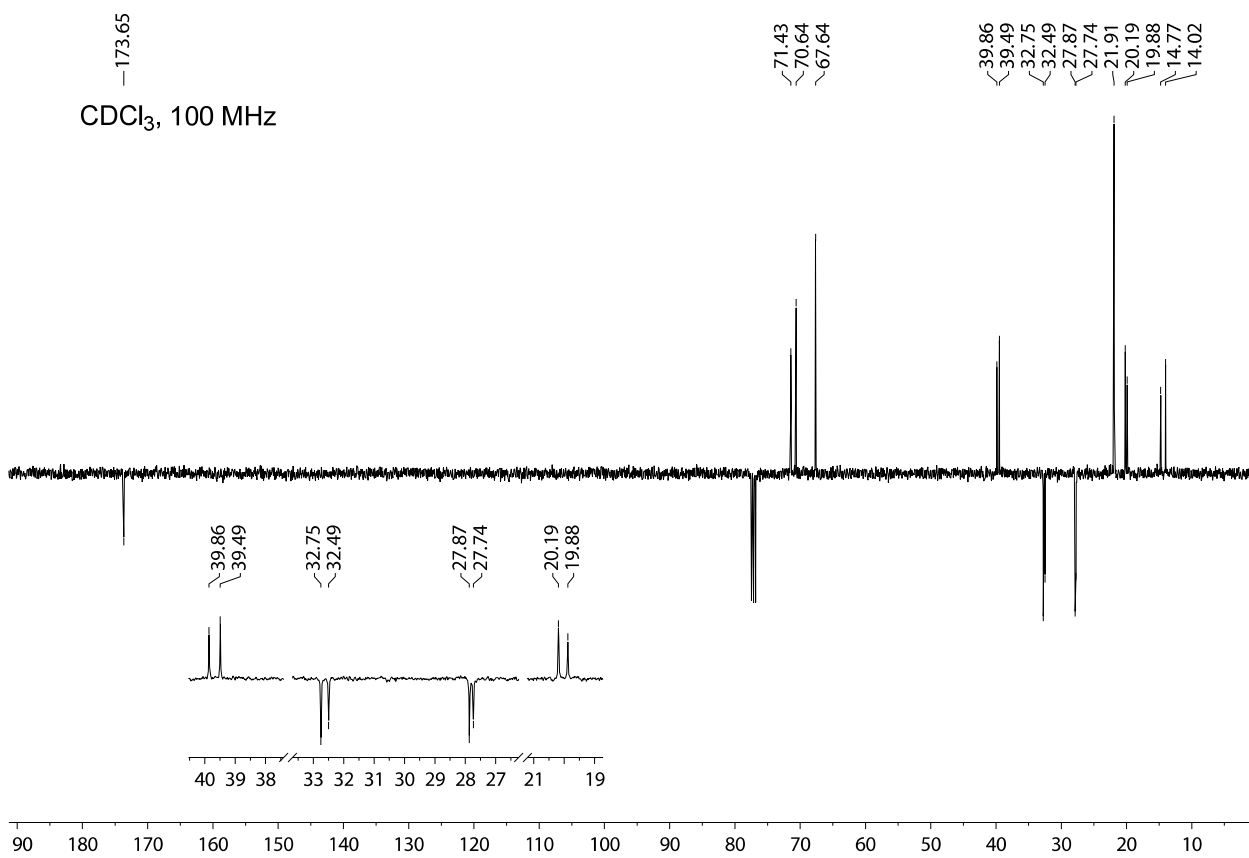

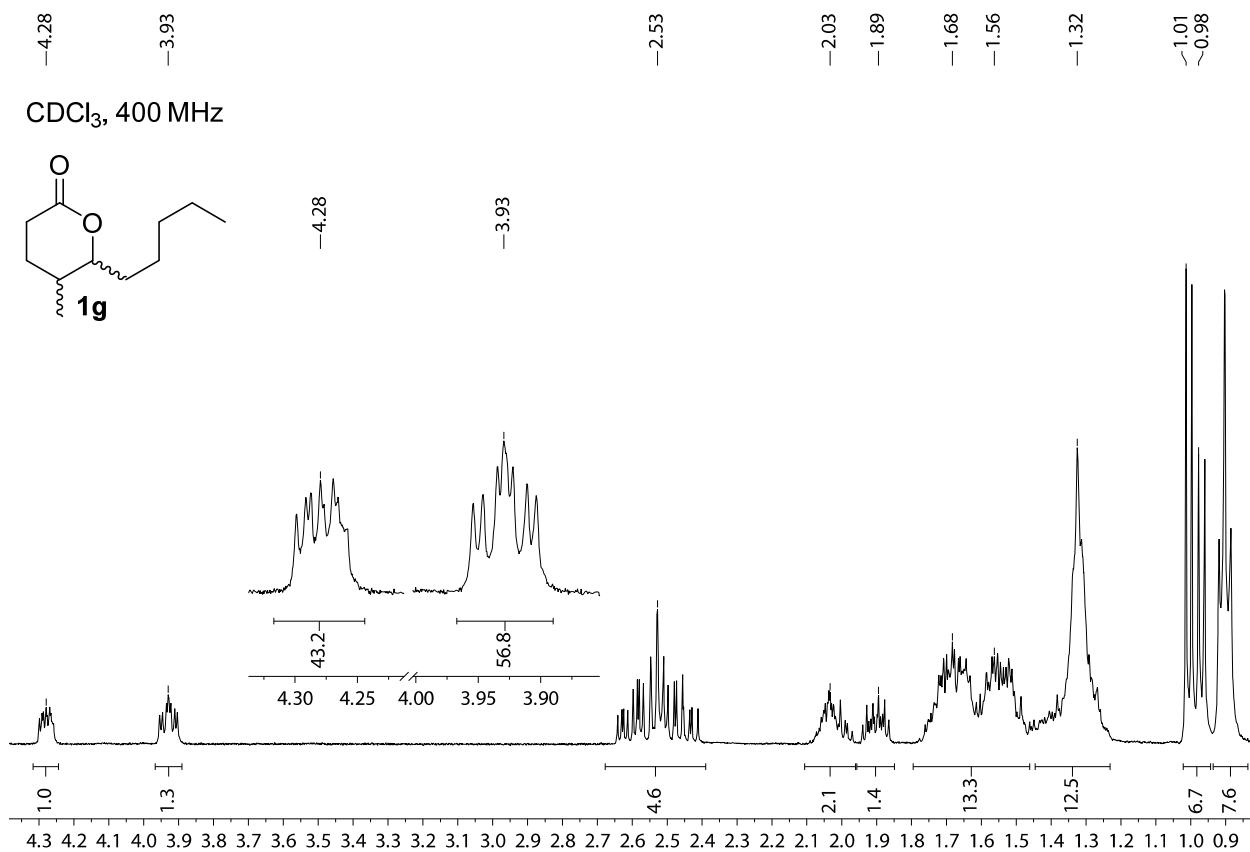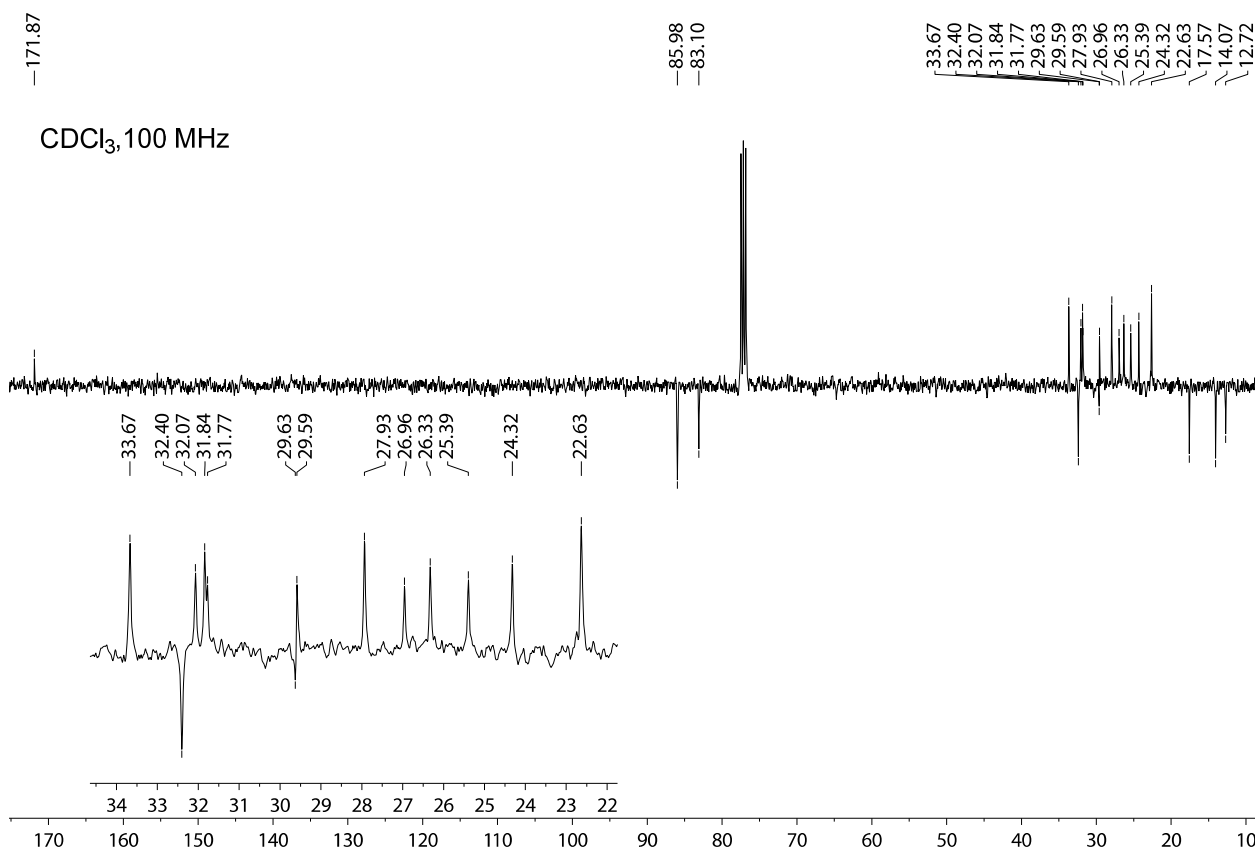

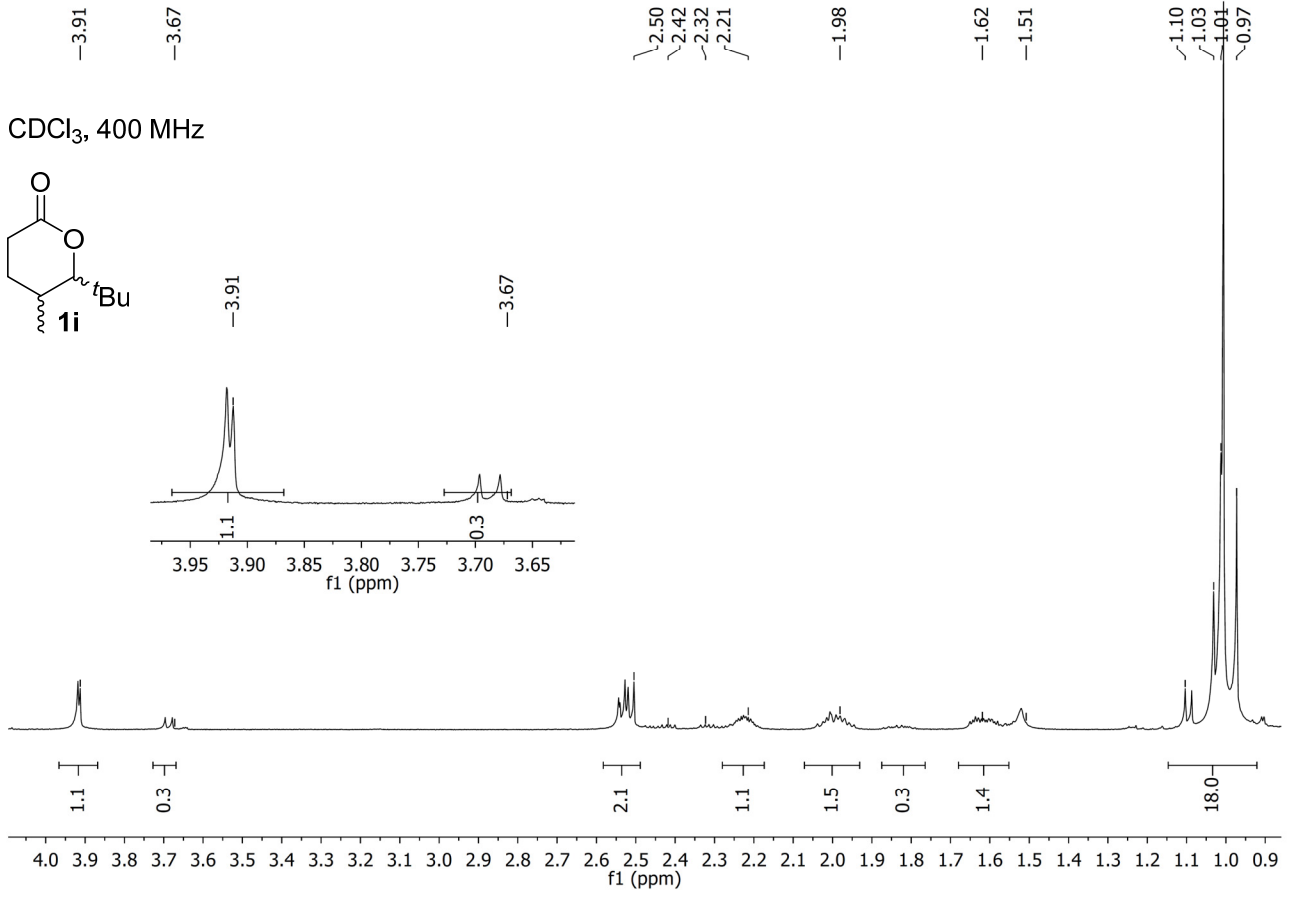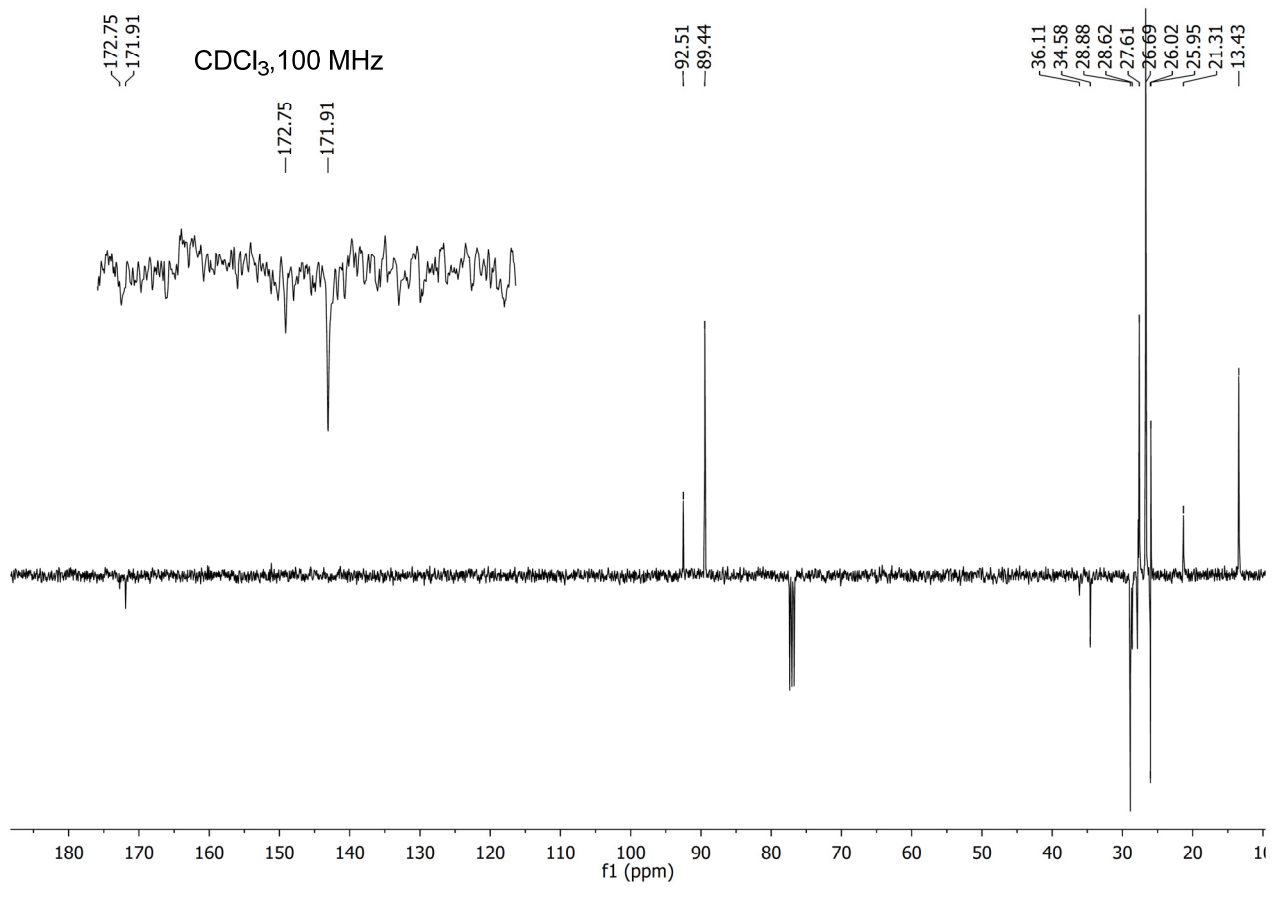

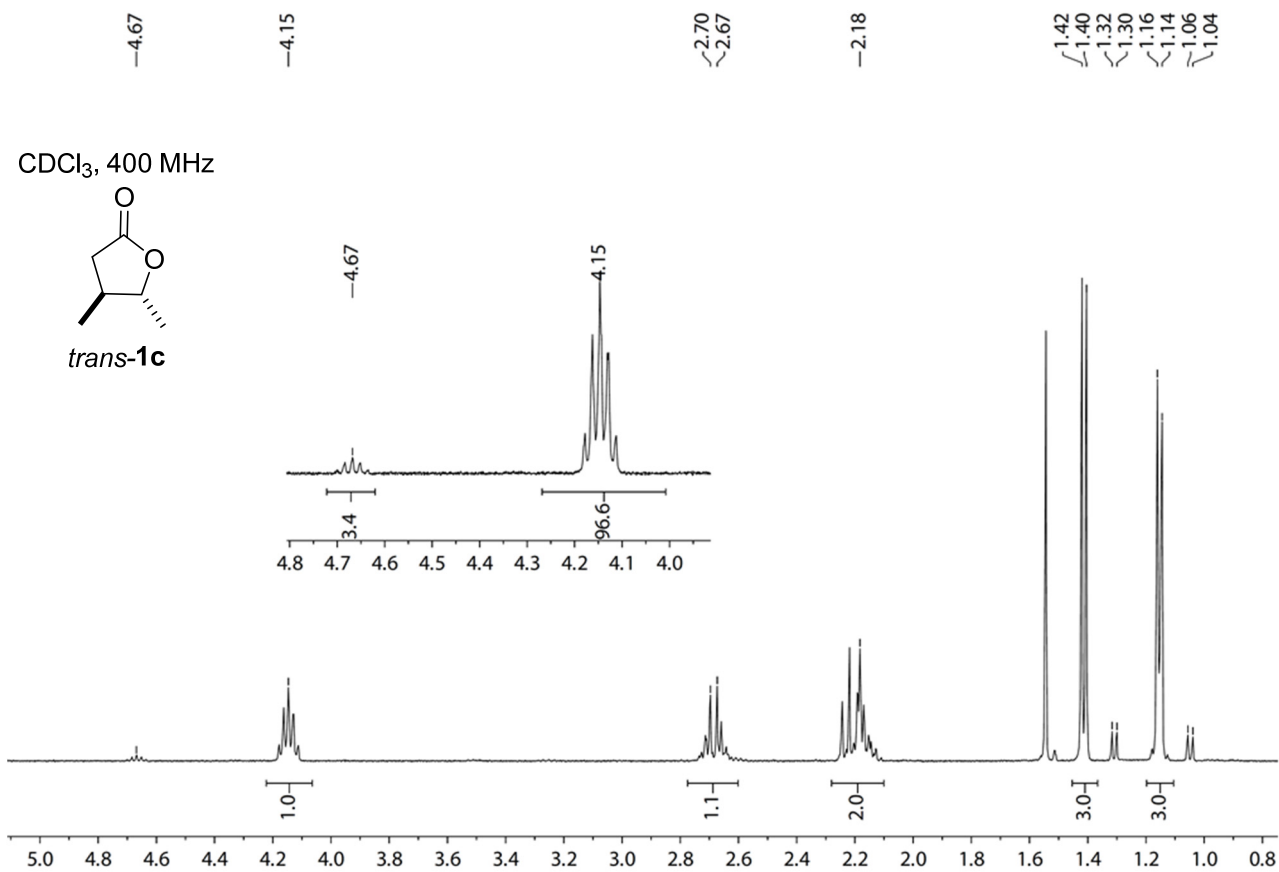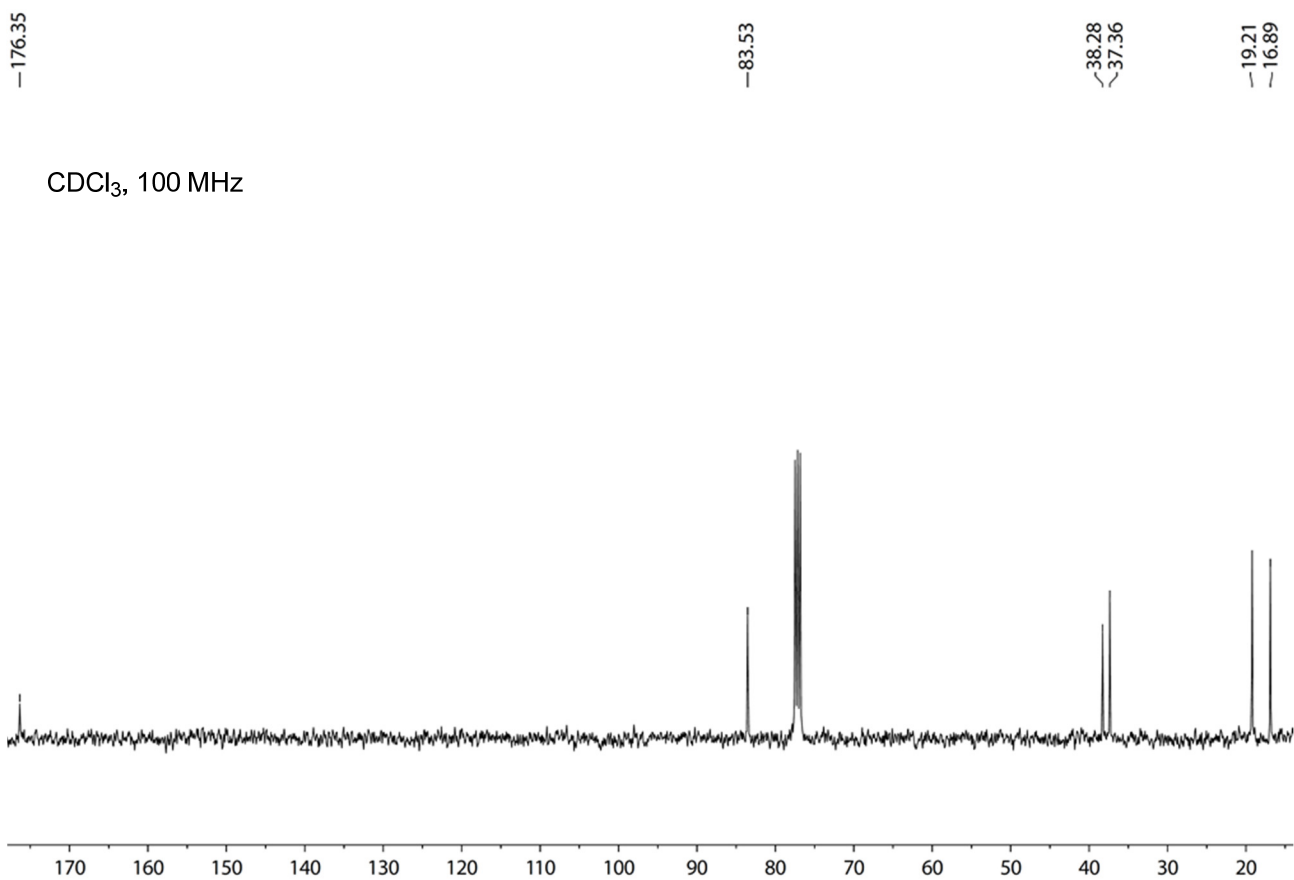

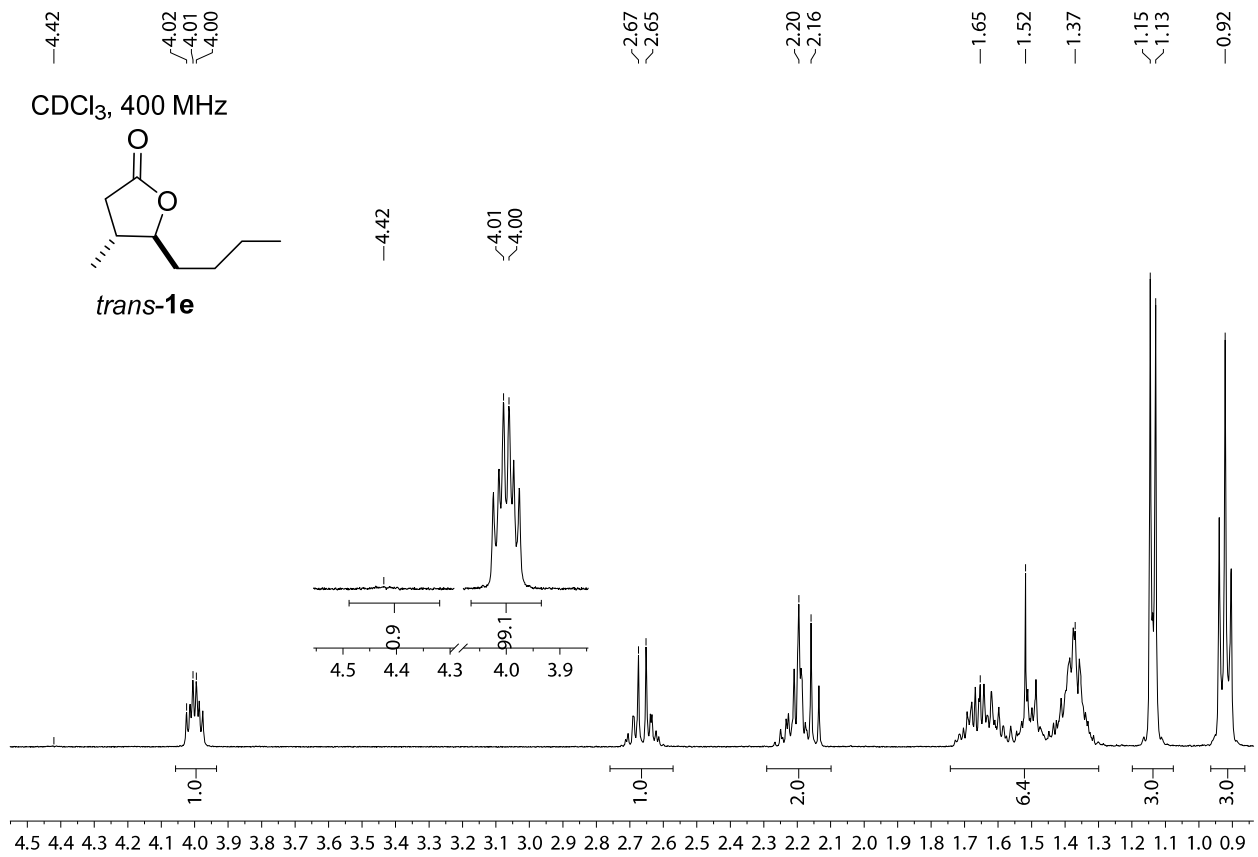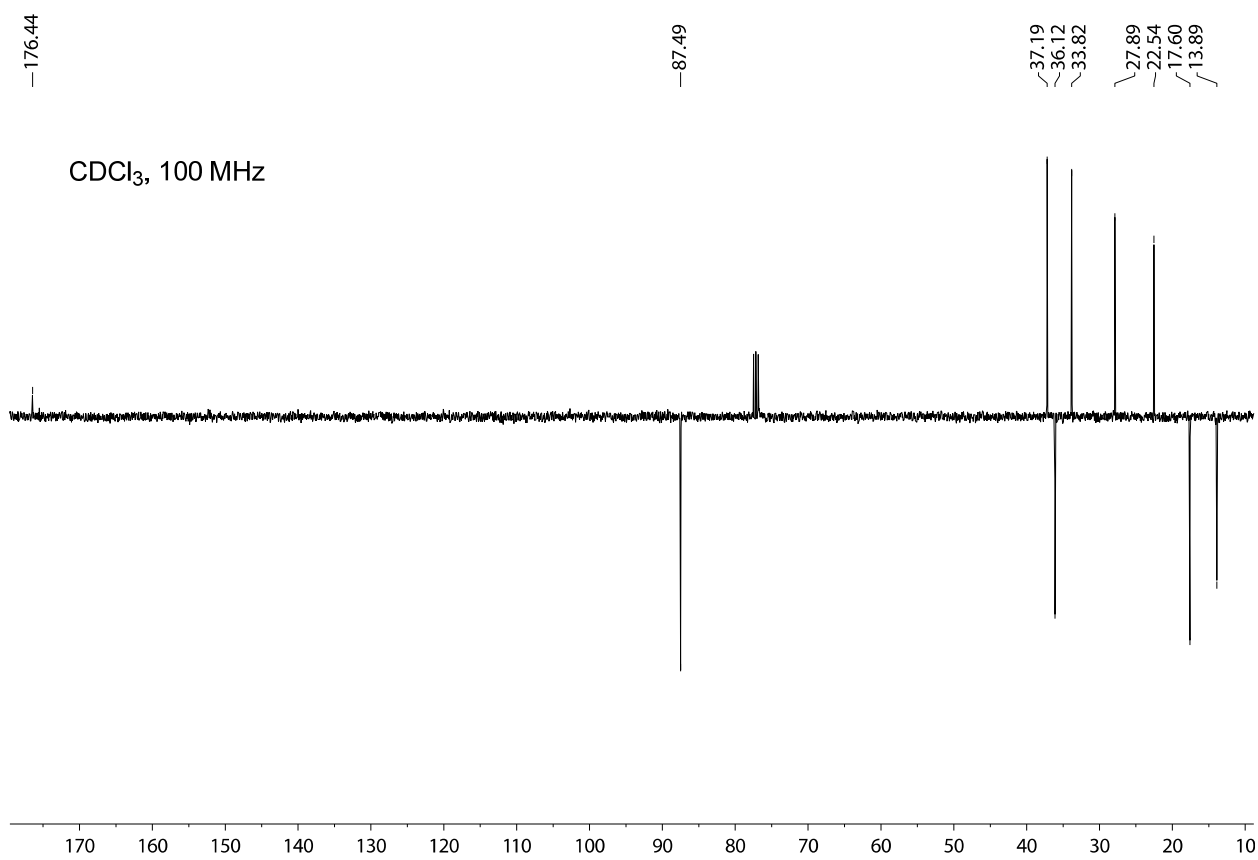

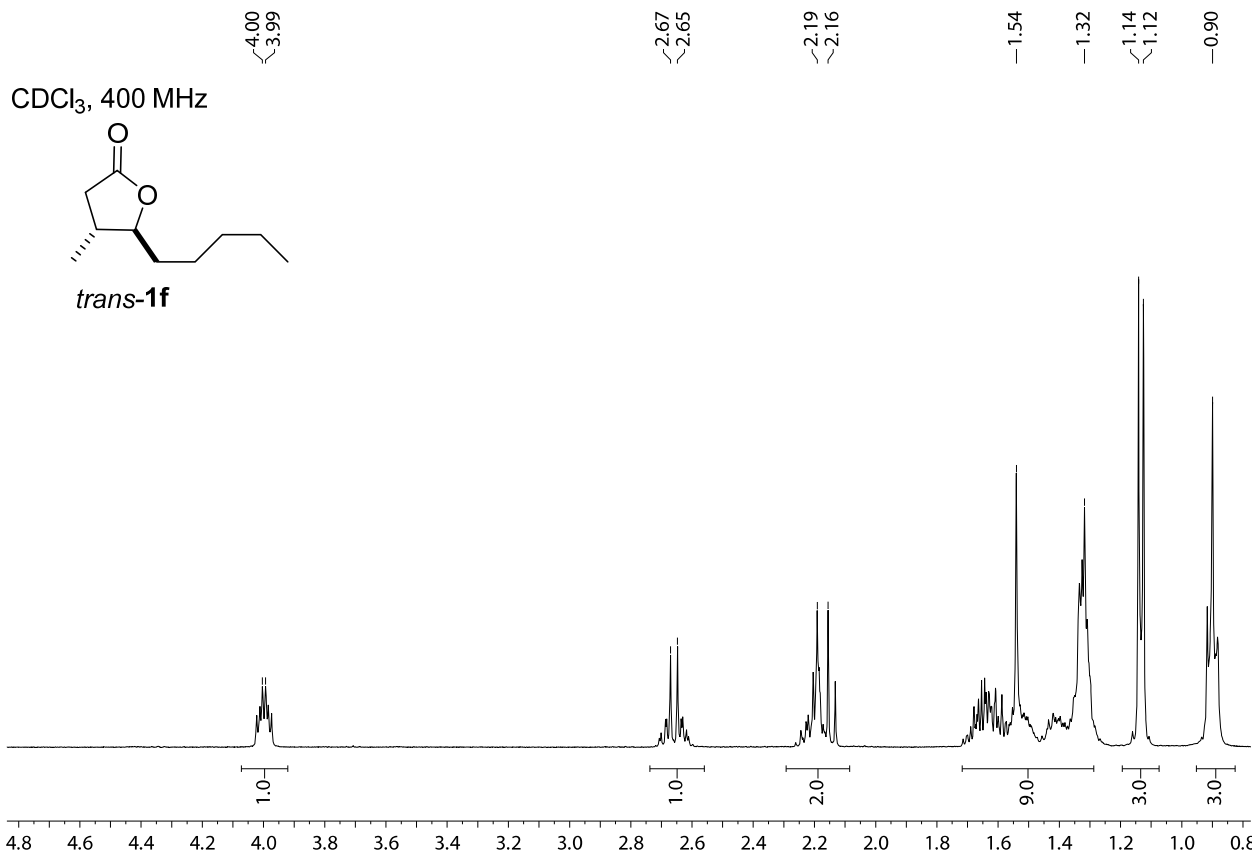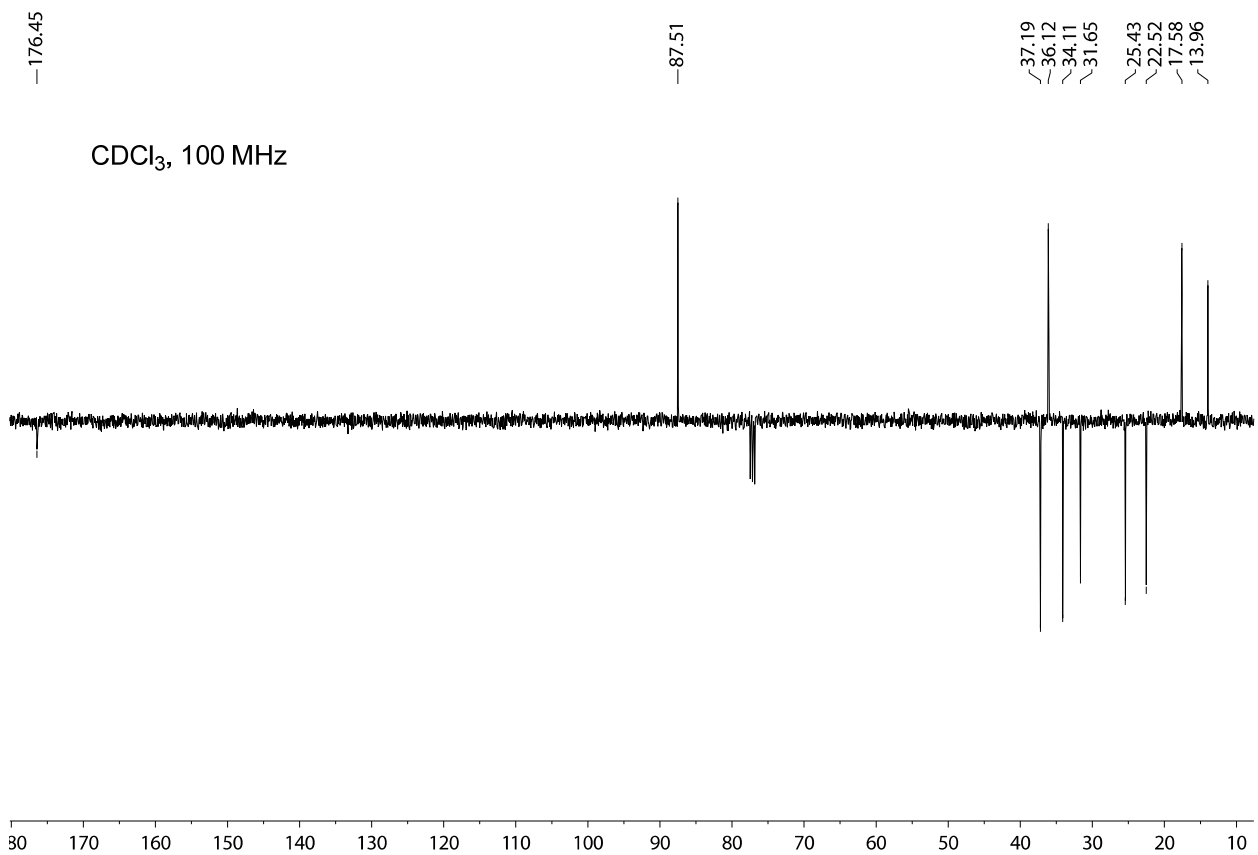

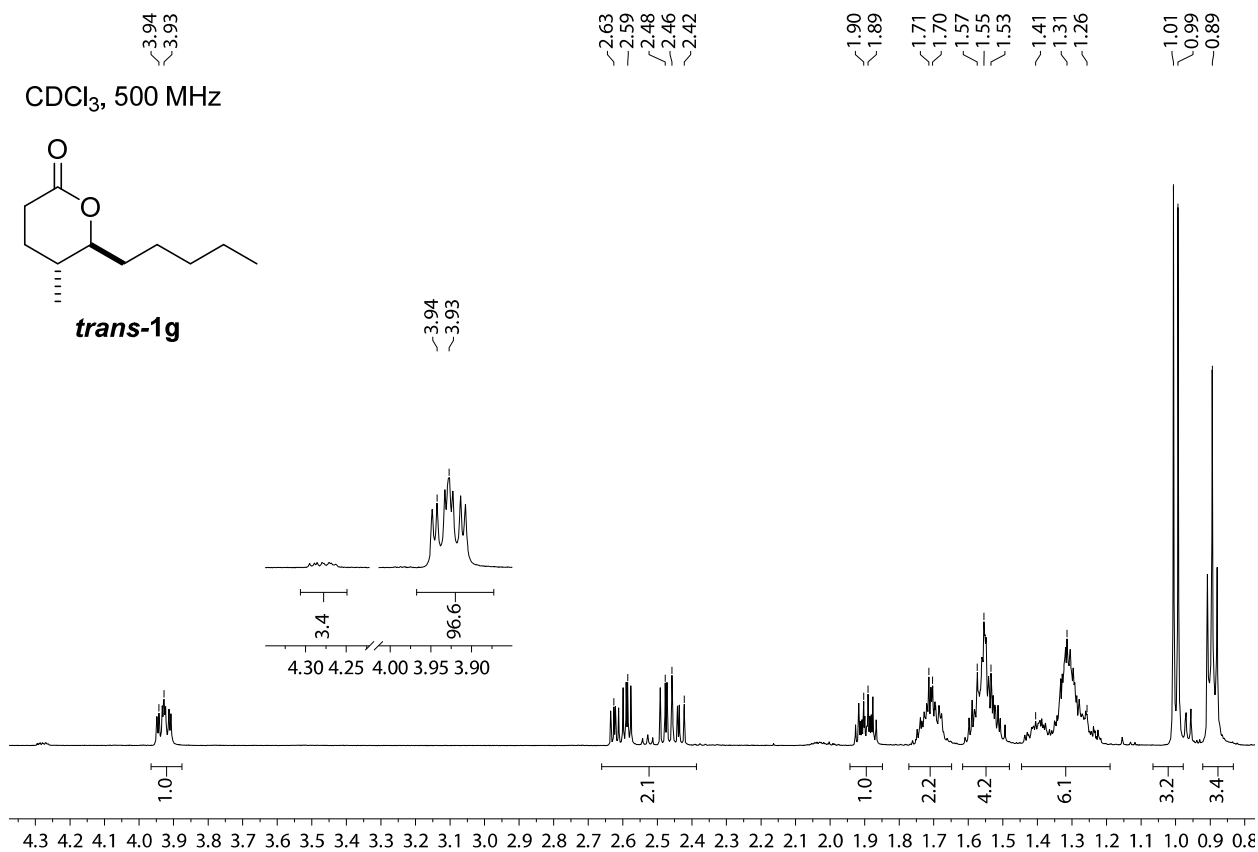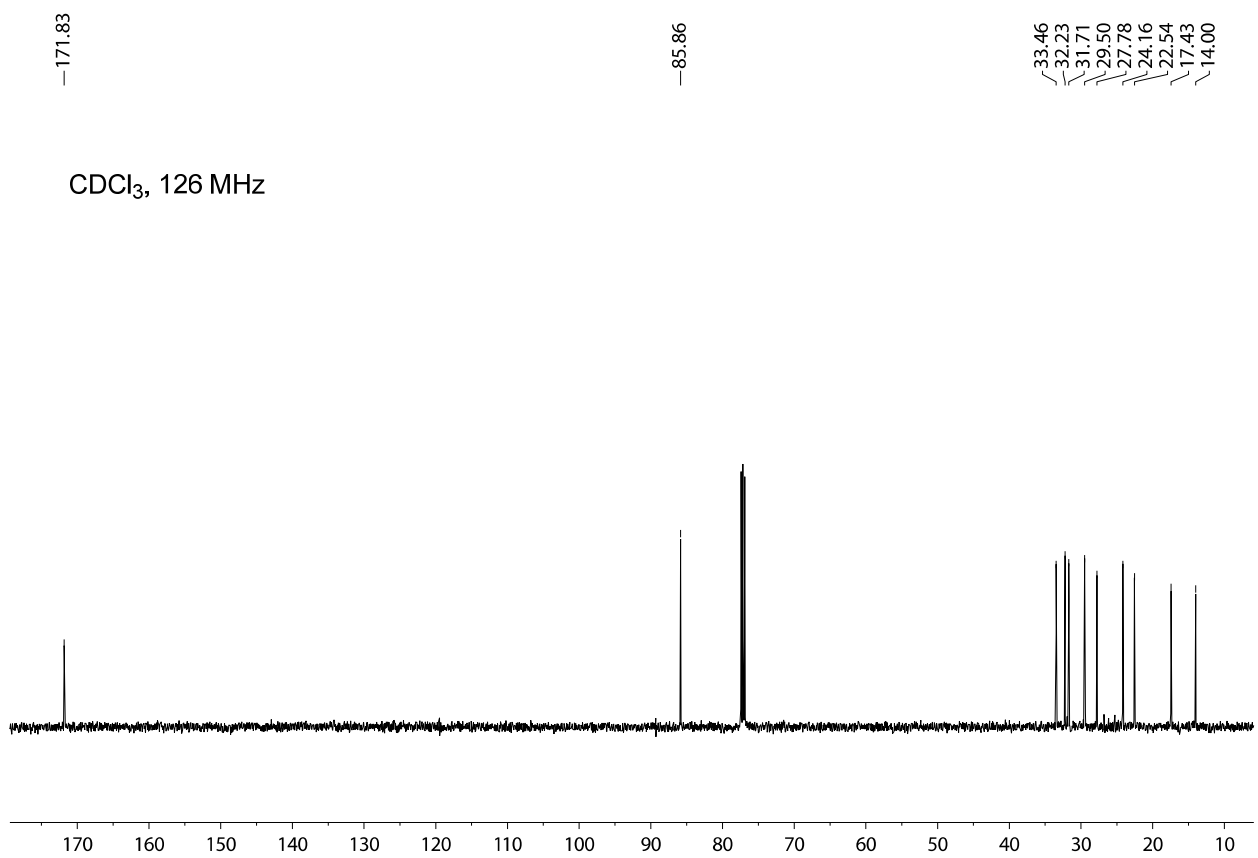

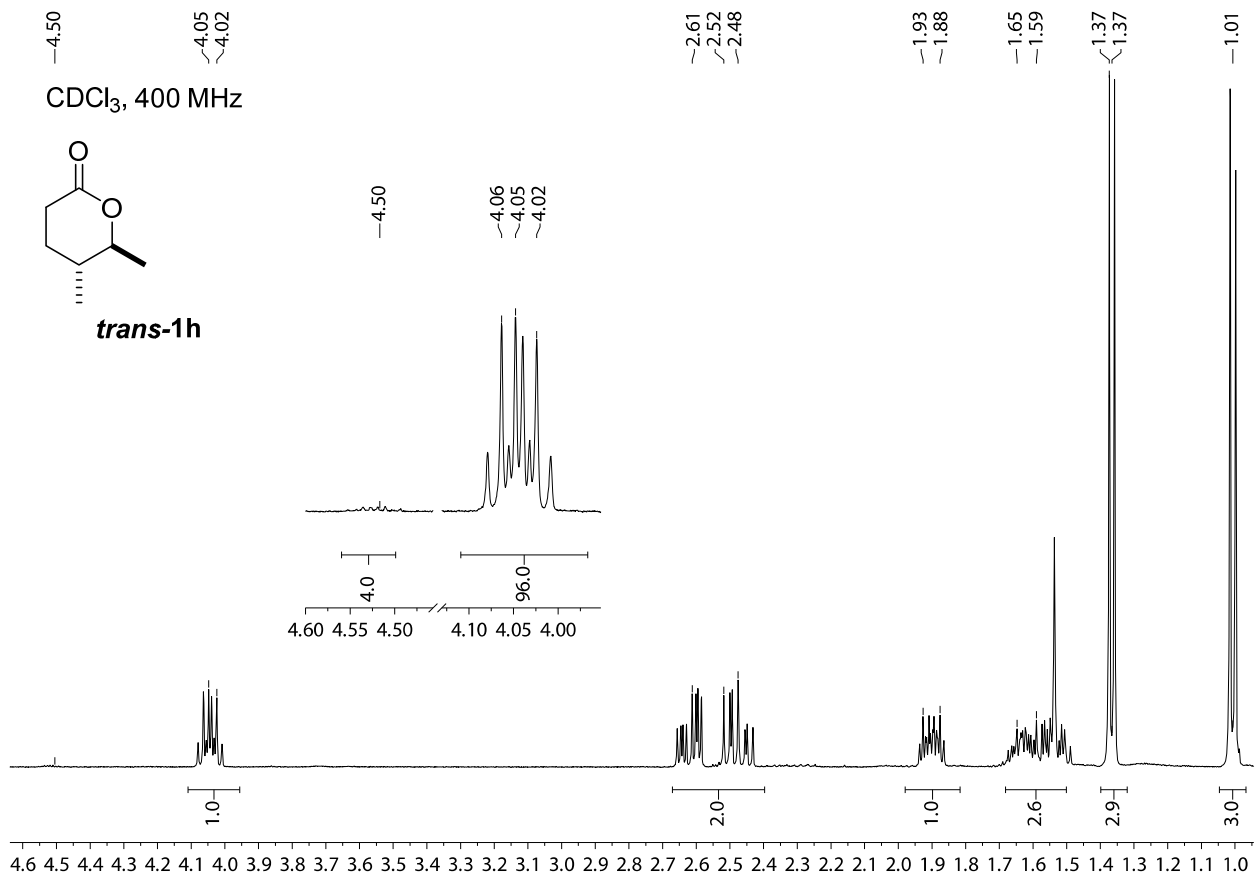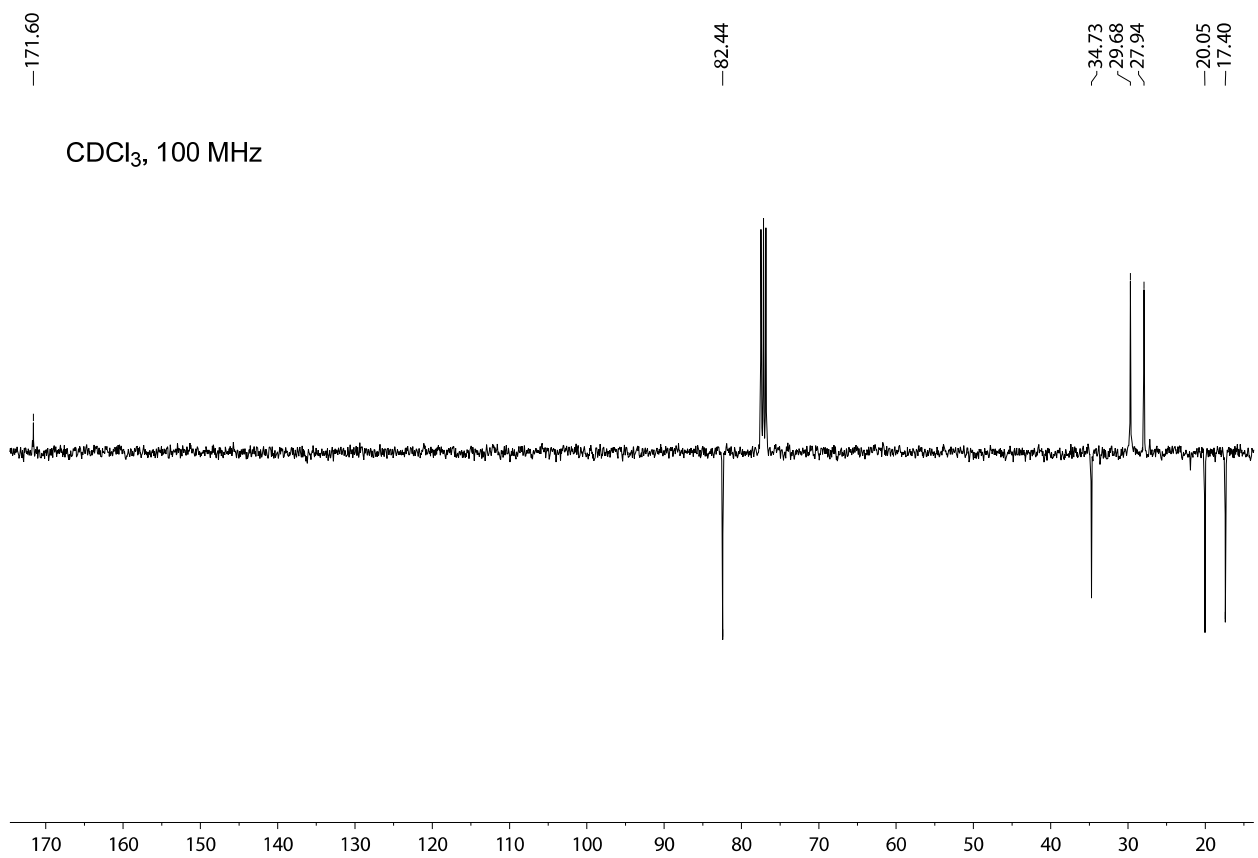



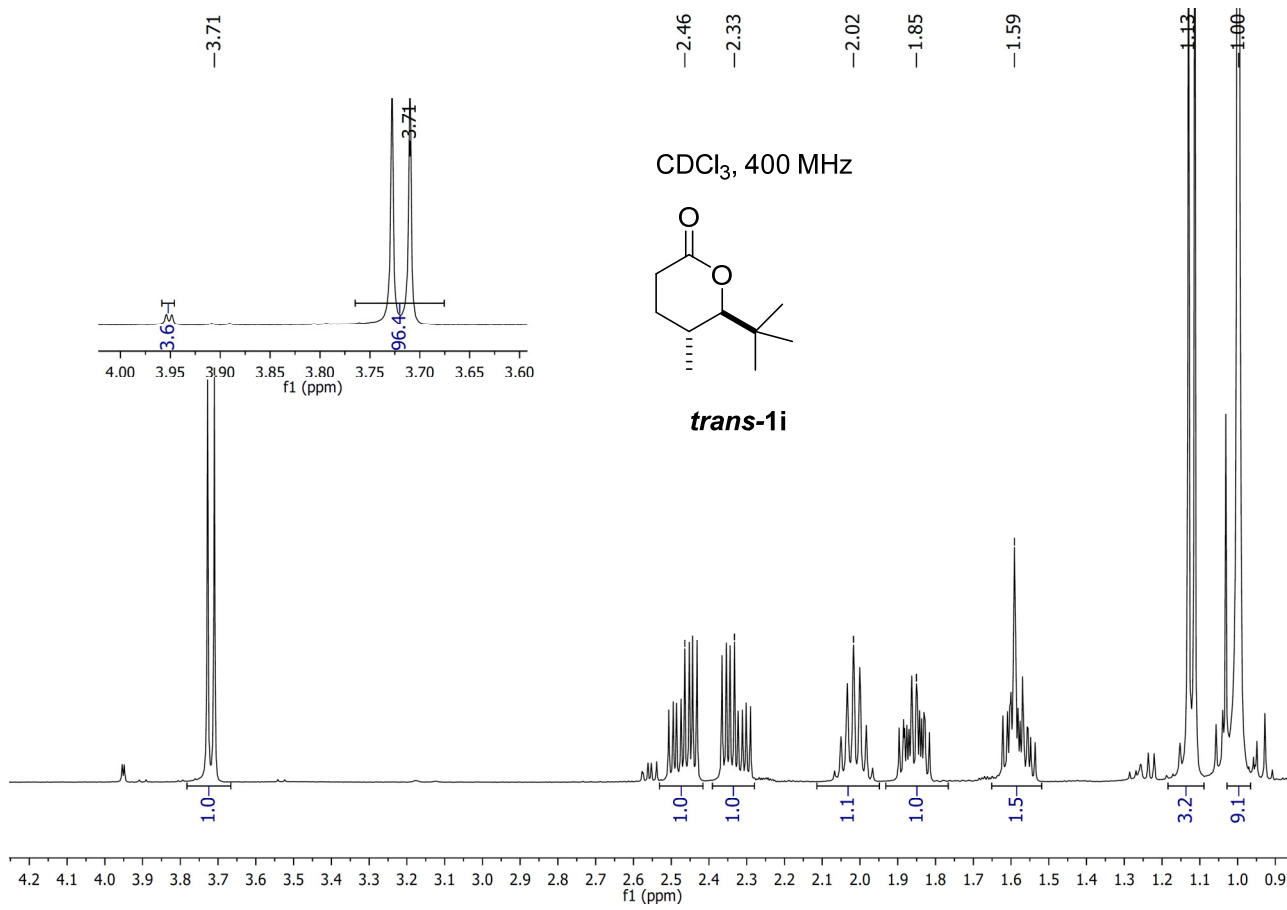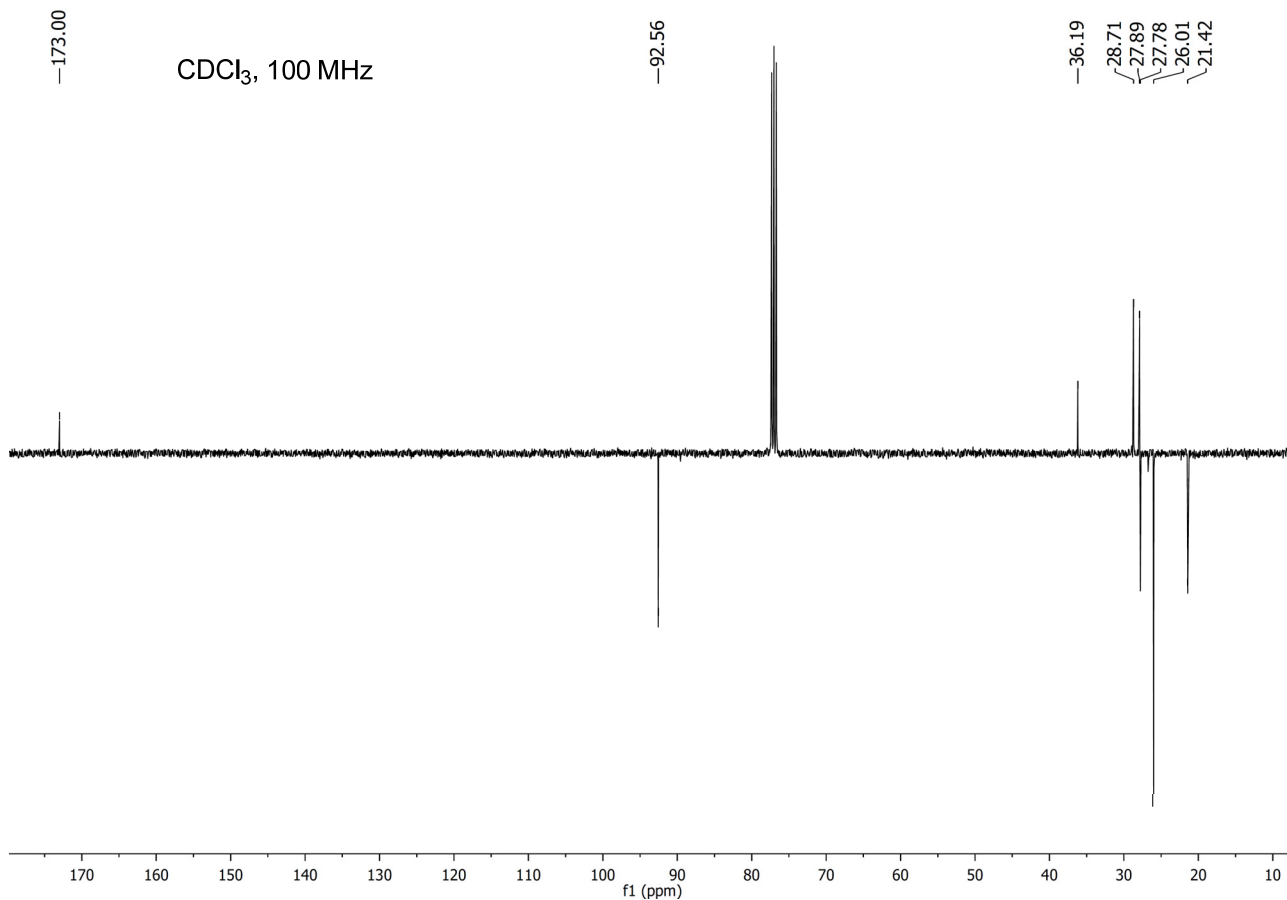

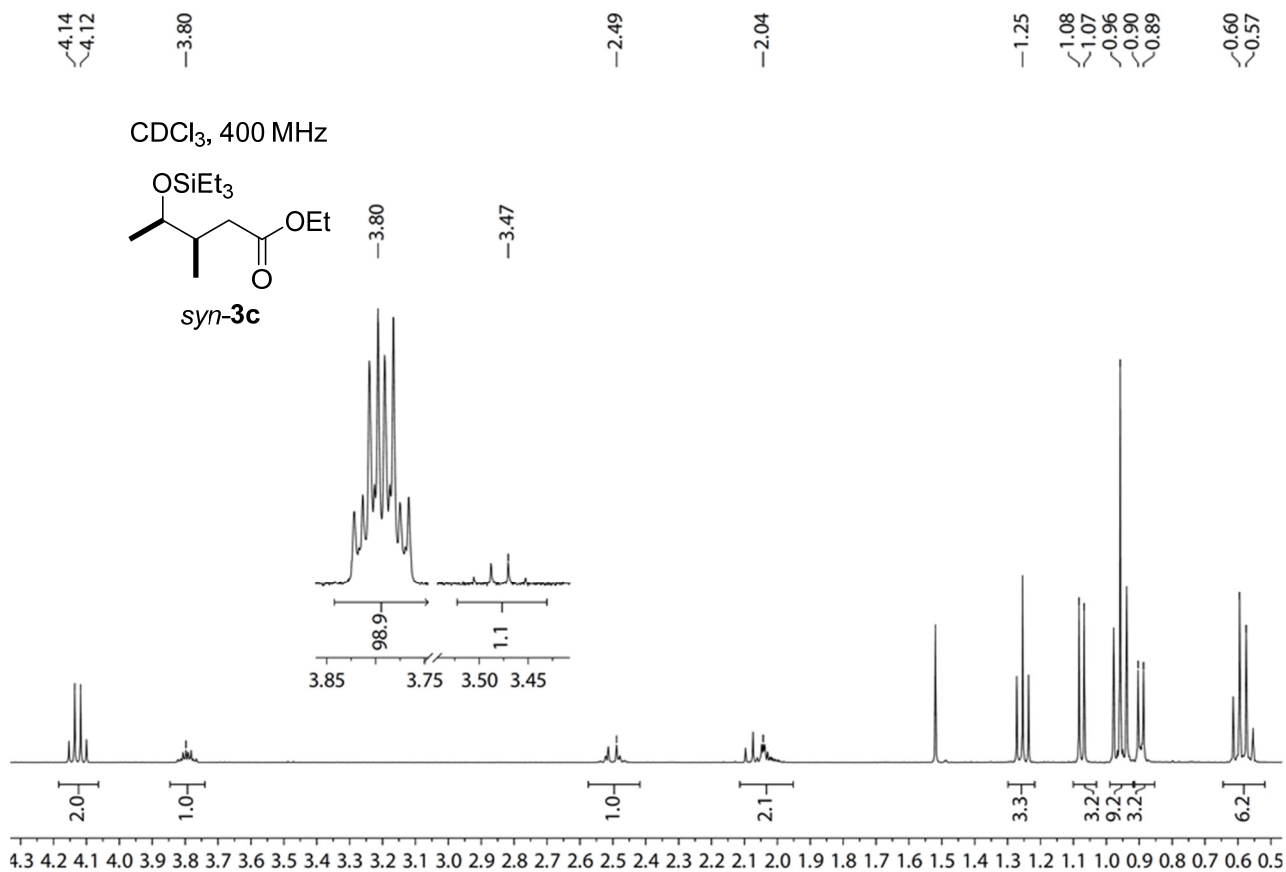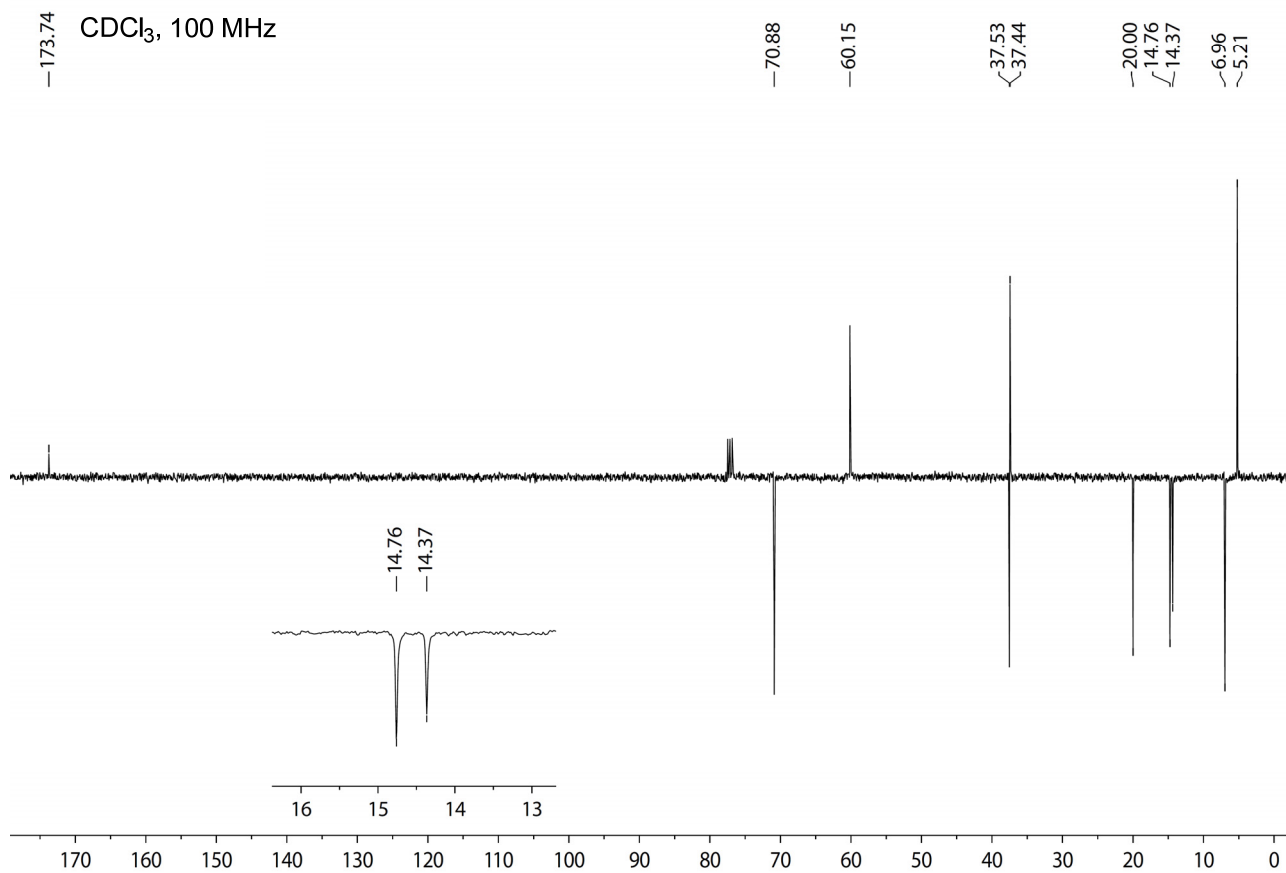

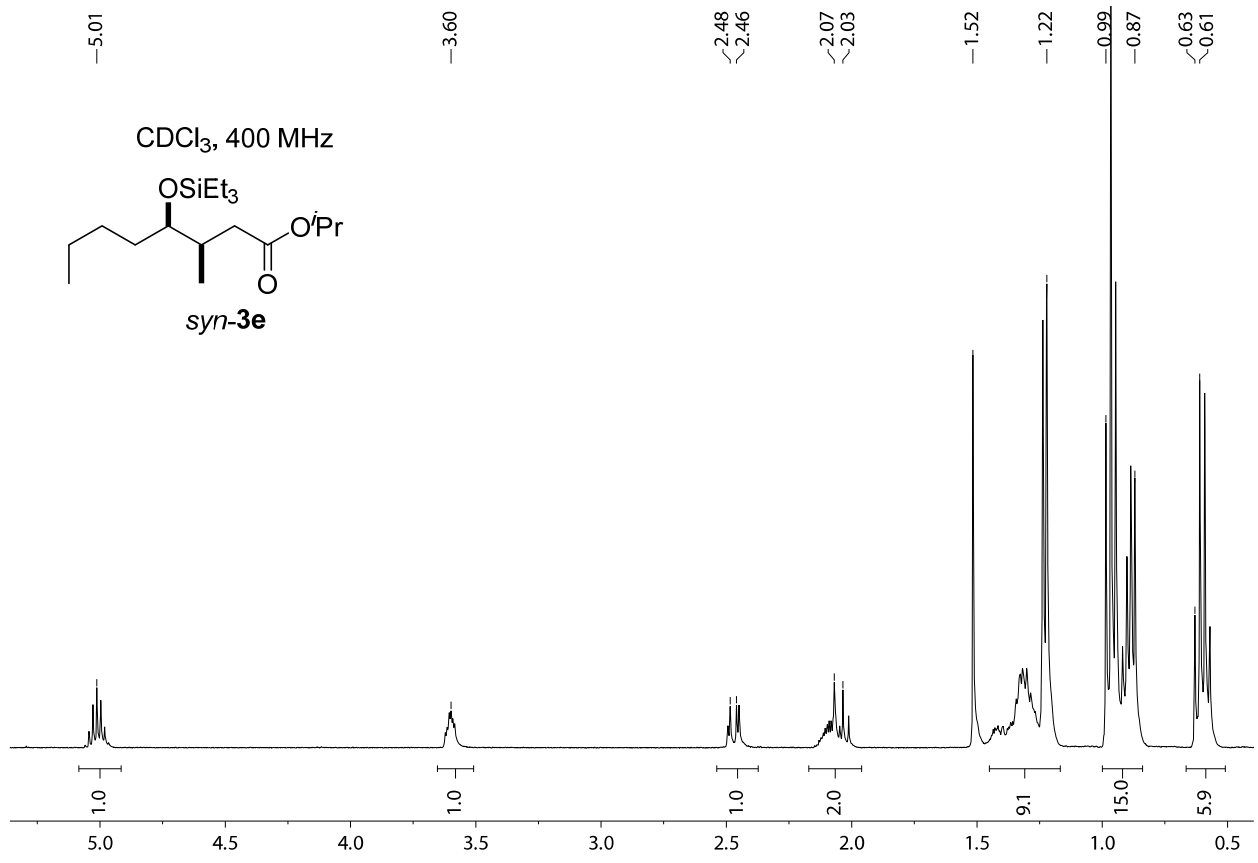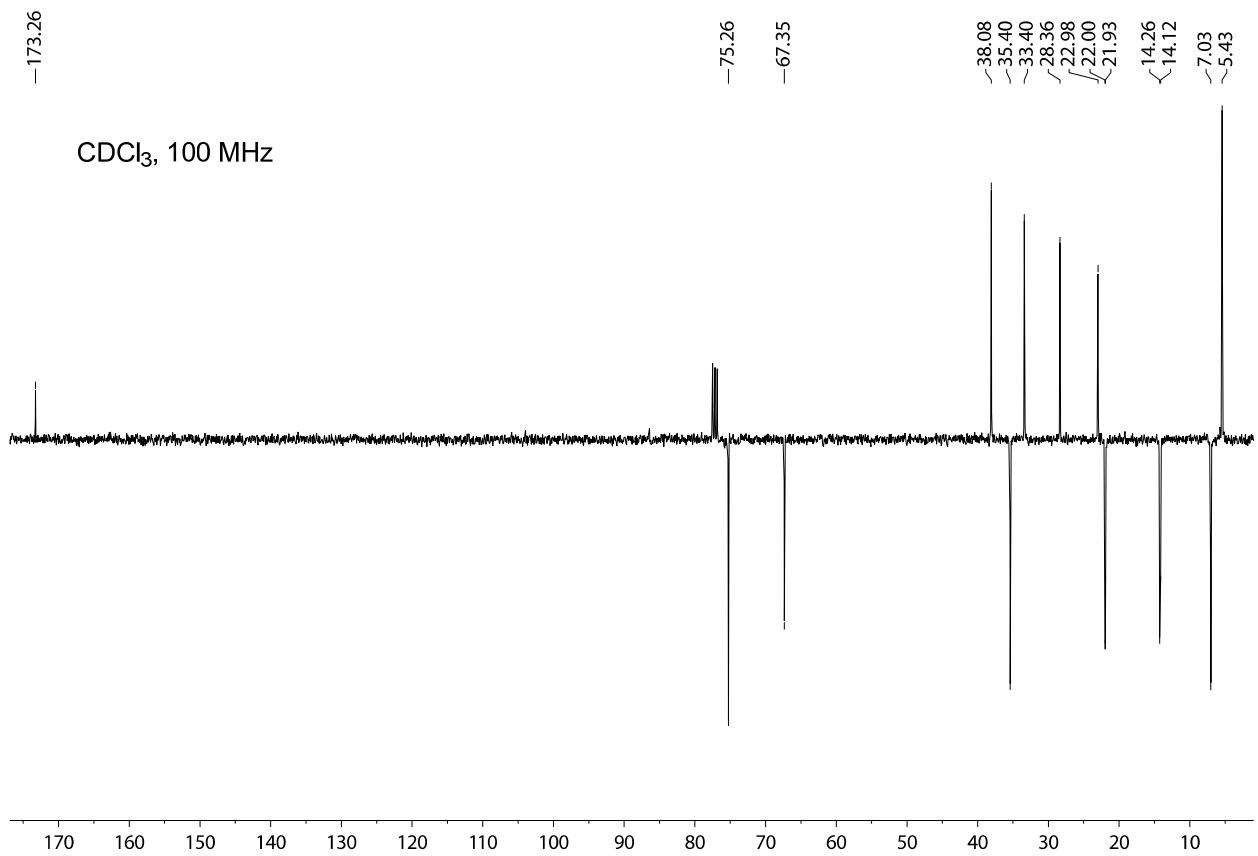

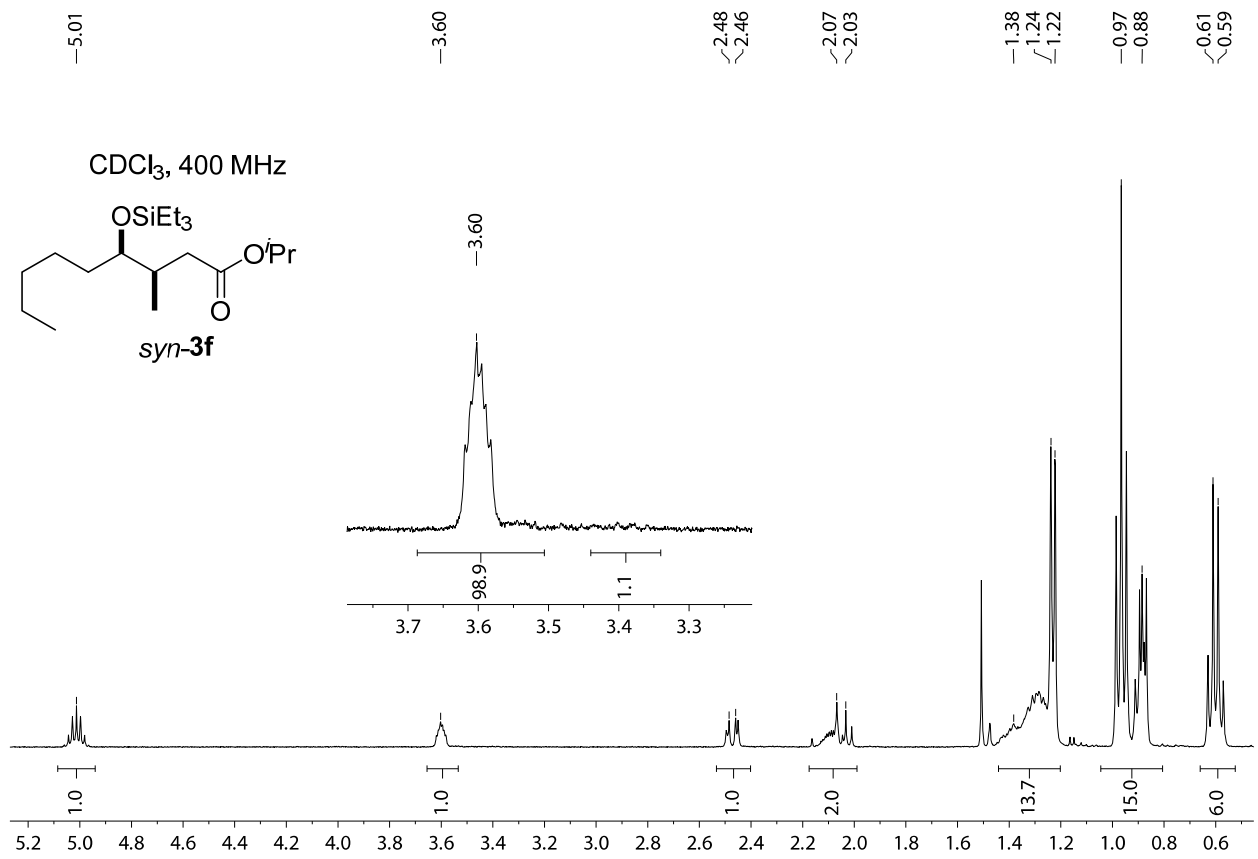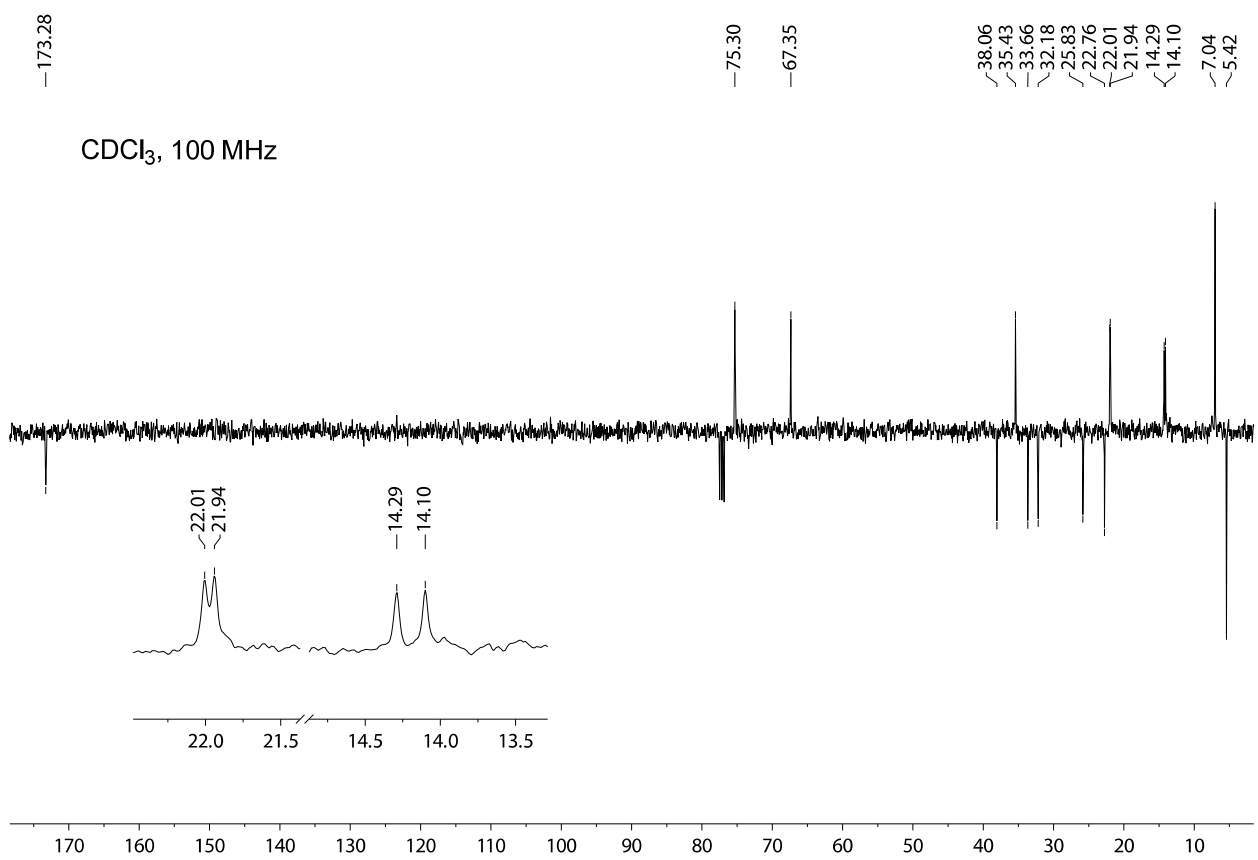

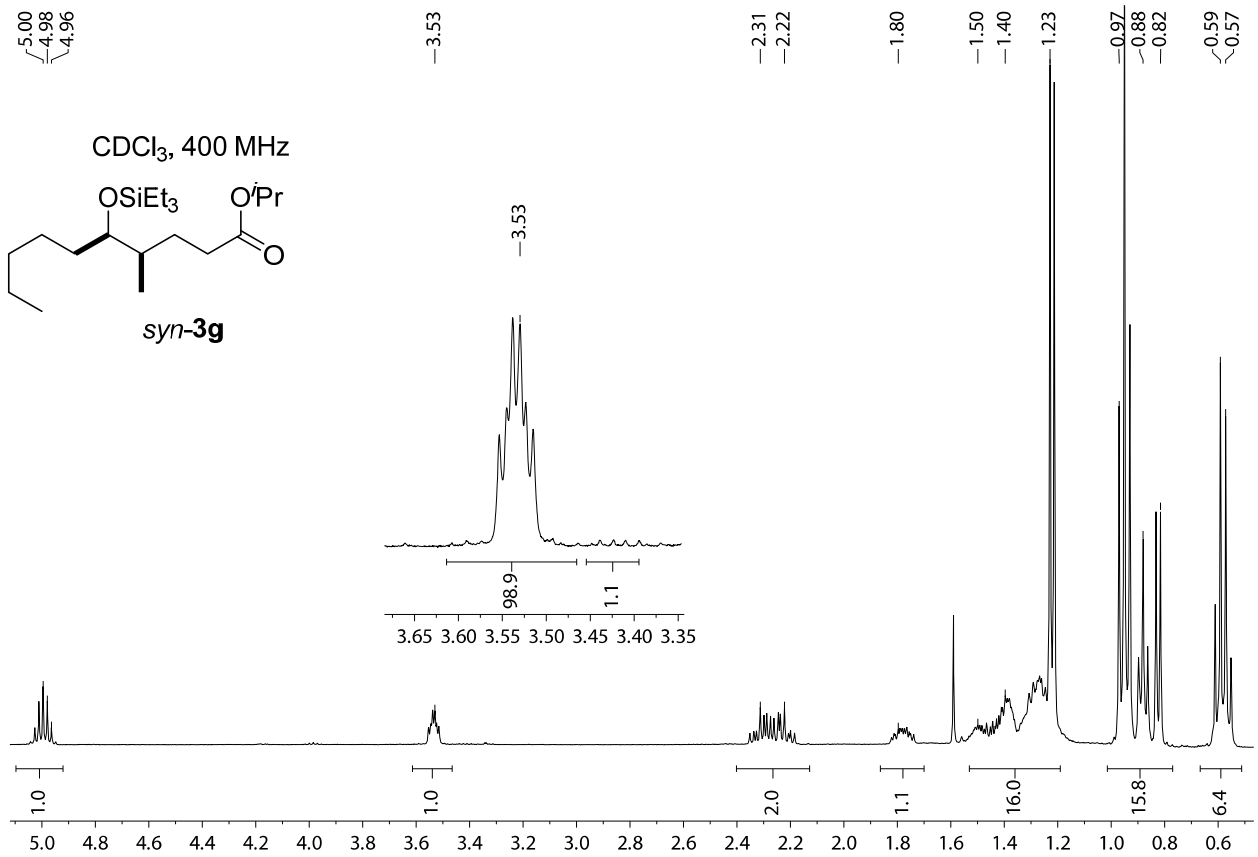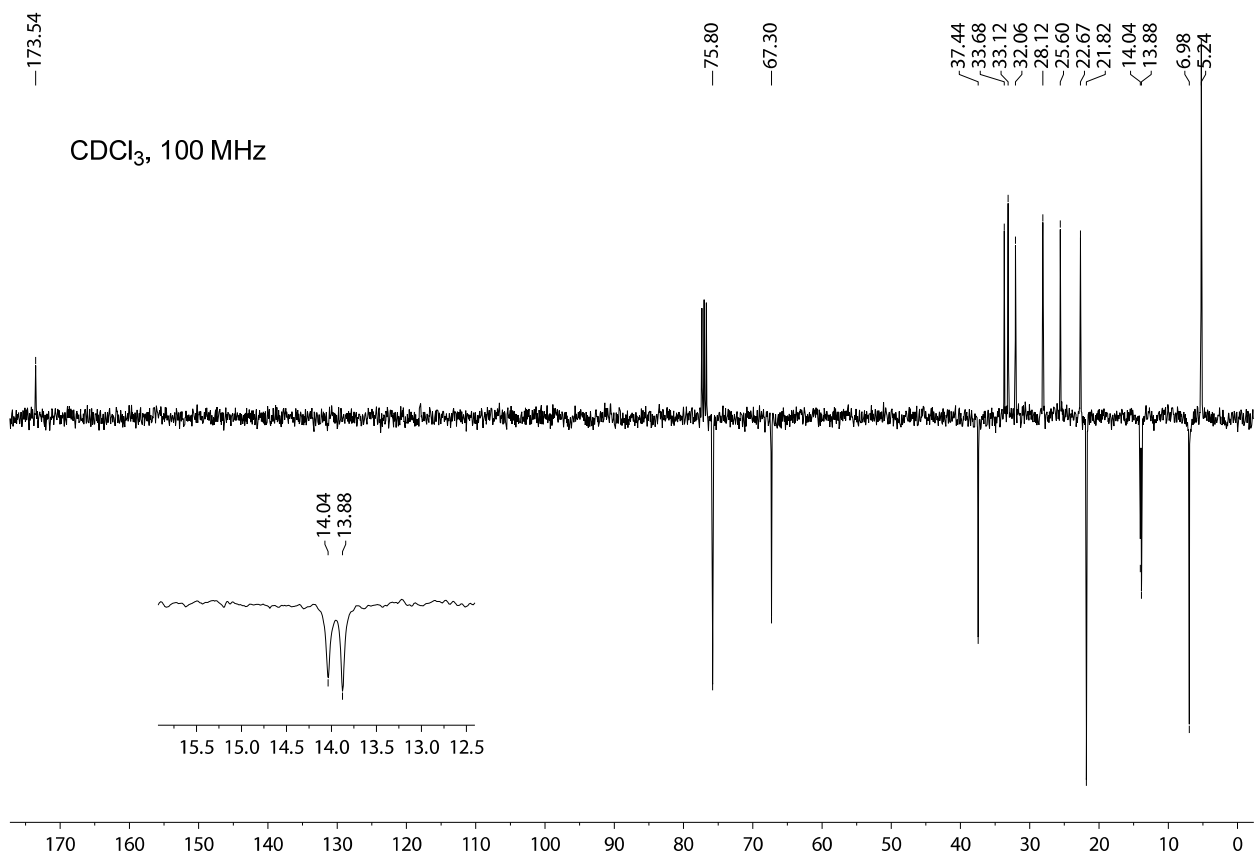

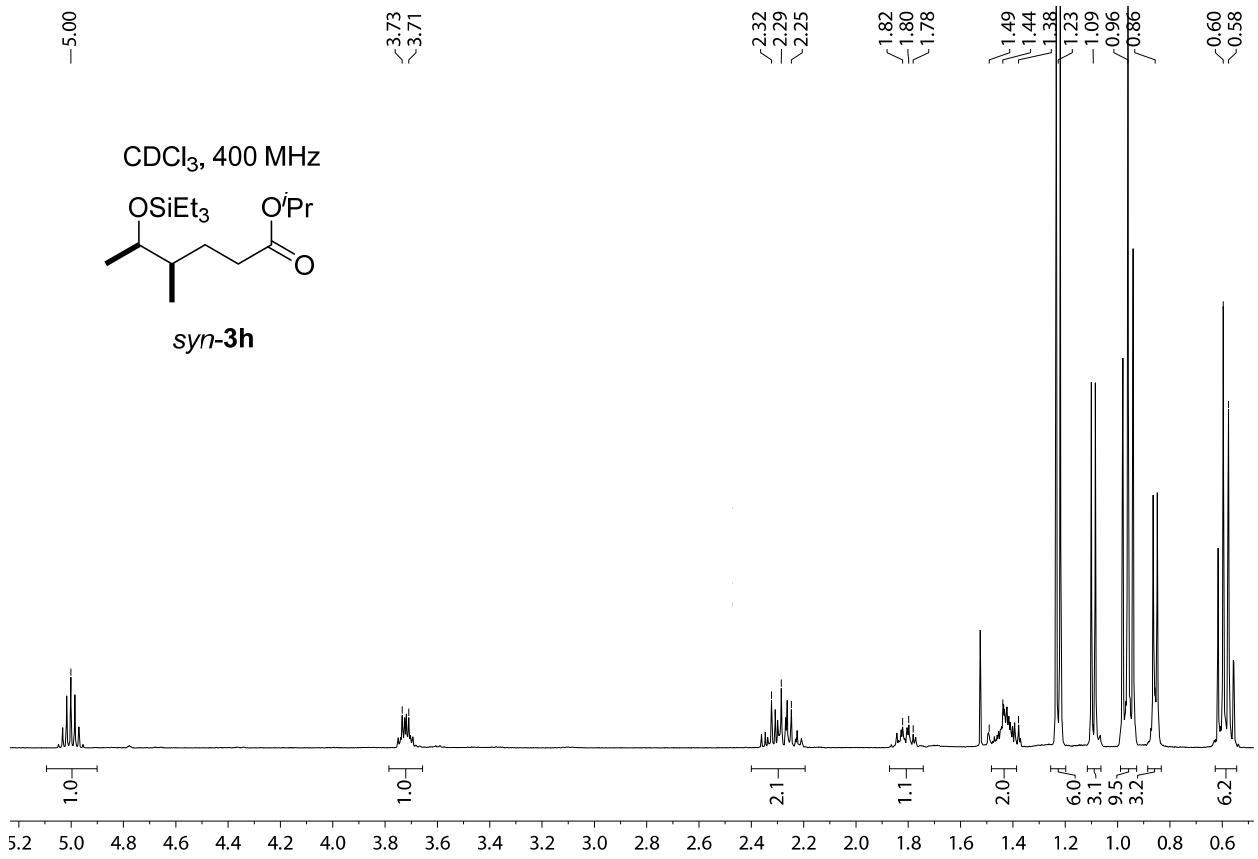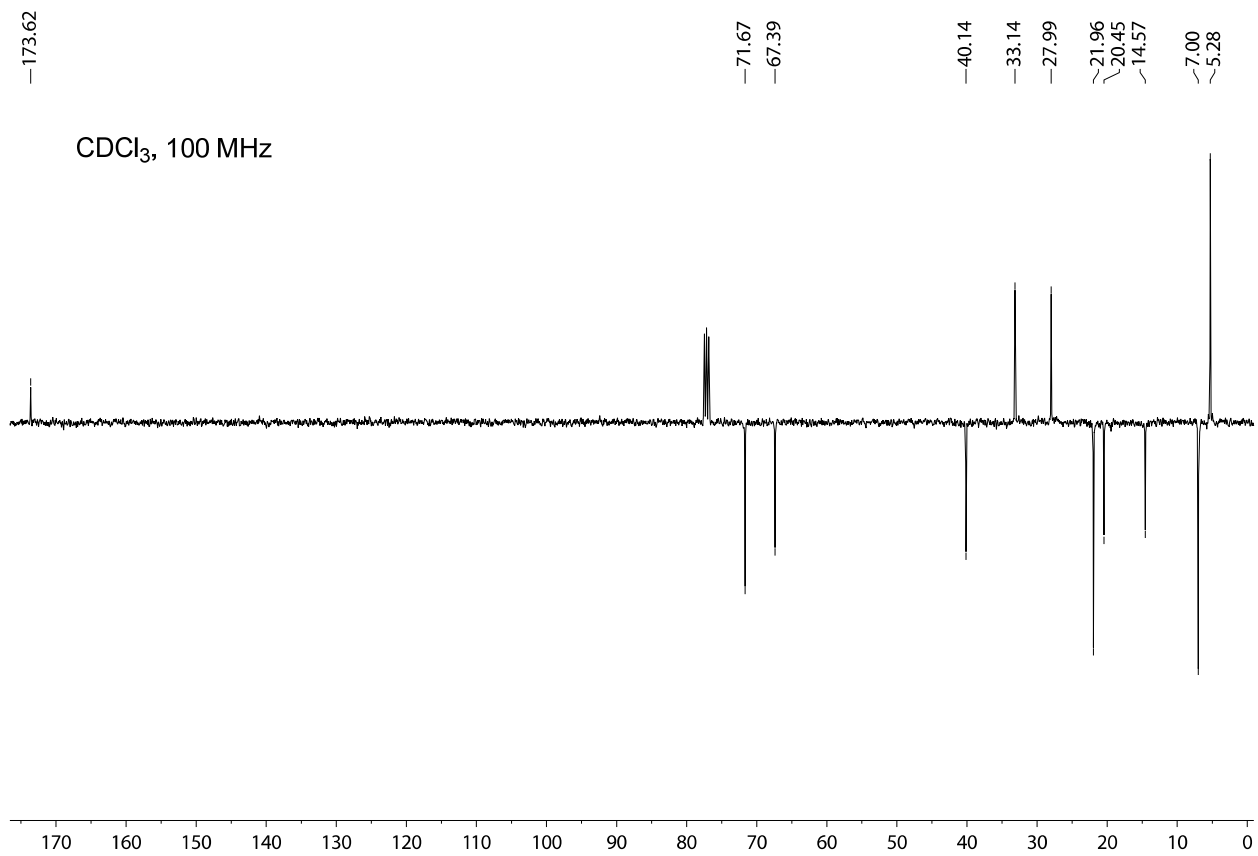

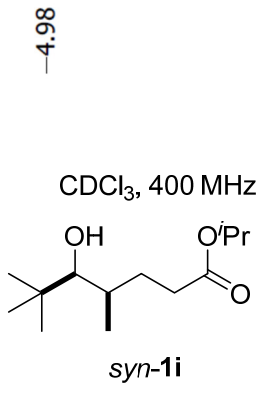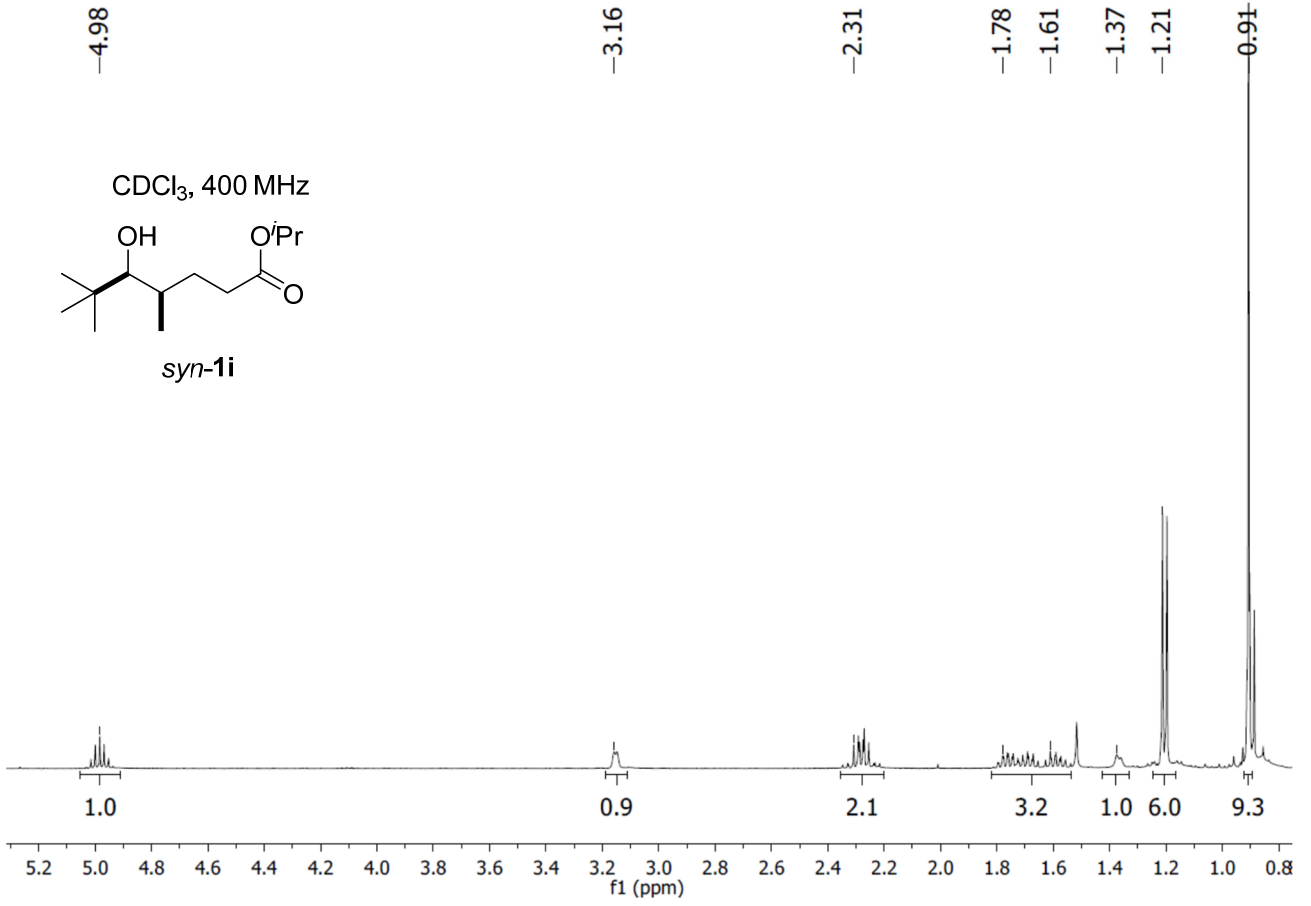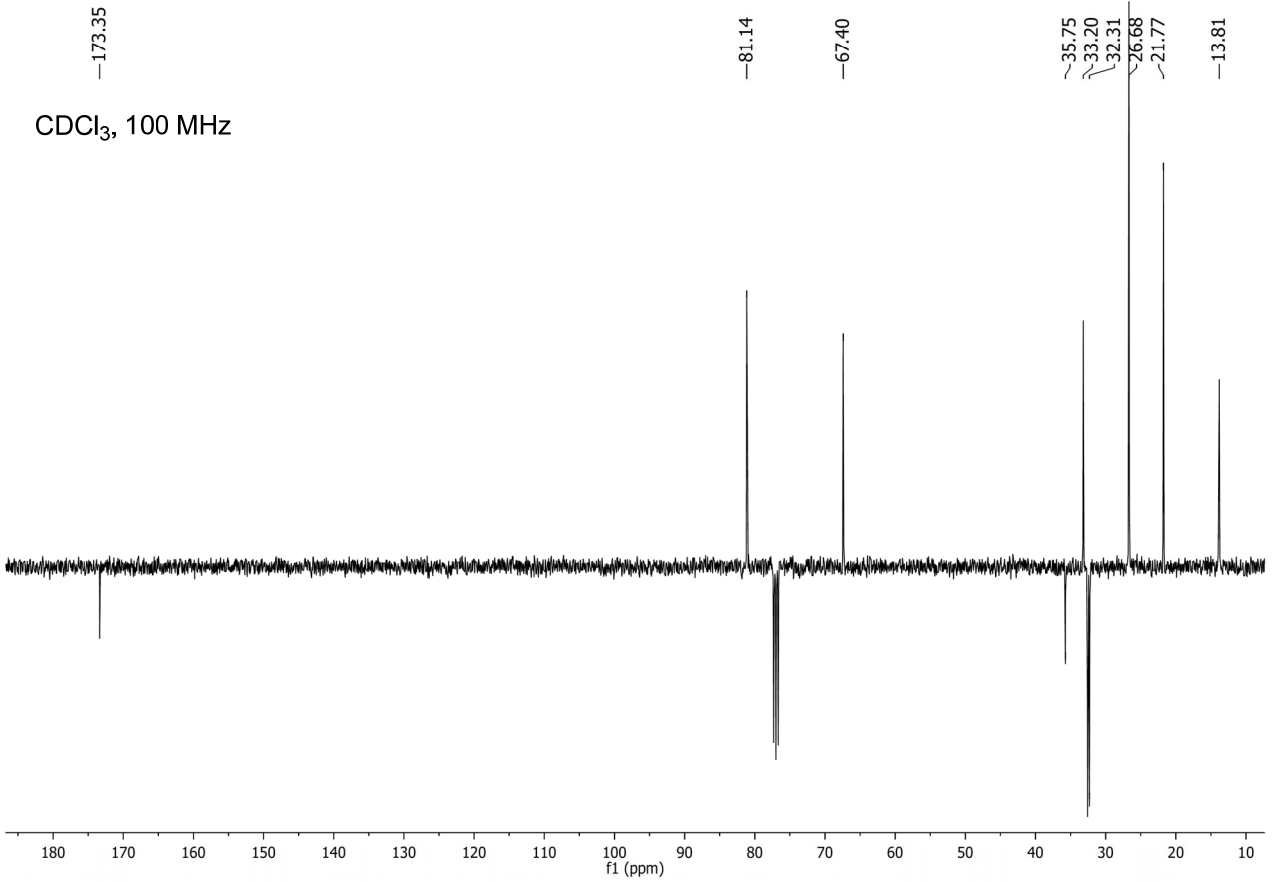

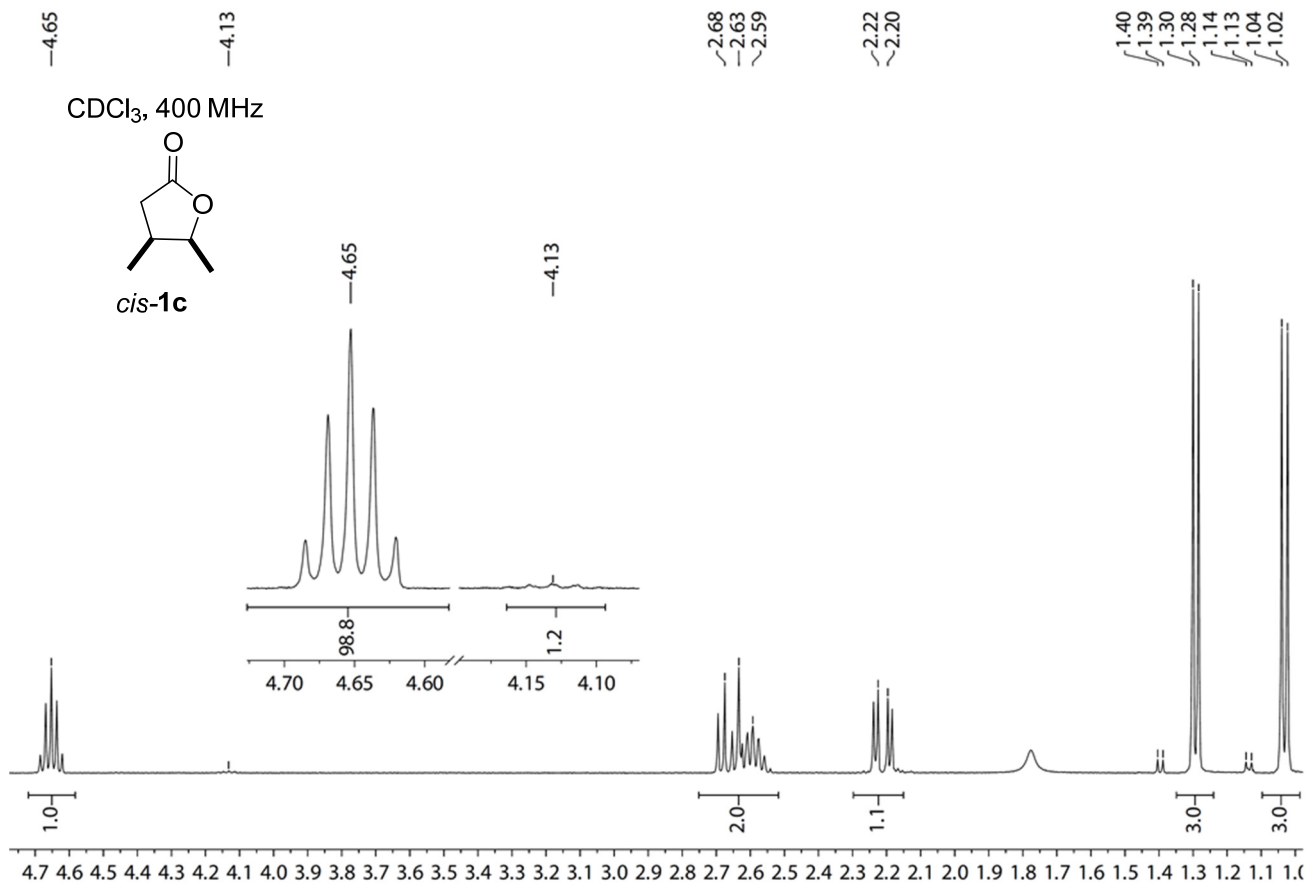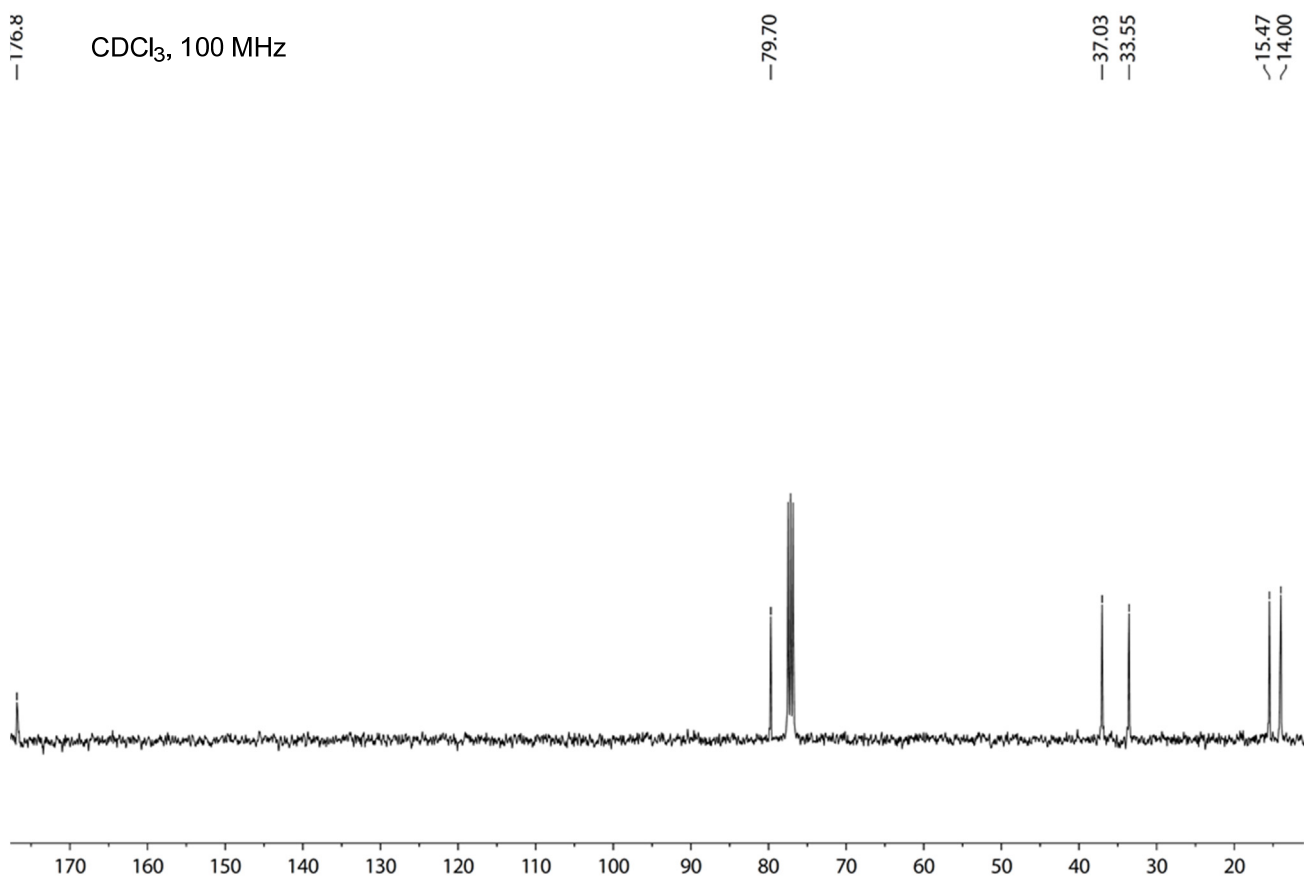



~4.42  
~4.41

~2.69  
~2.65  
~2.57

~2.21  
~2.17

~1.65  
~1.54  
~1.37

~1.02  
~1.00  
~0.92

CDCl<sub>3</sub>, 400 MHz

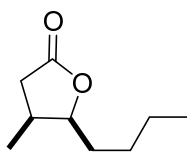

*cis*-1e

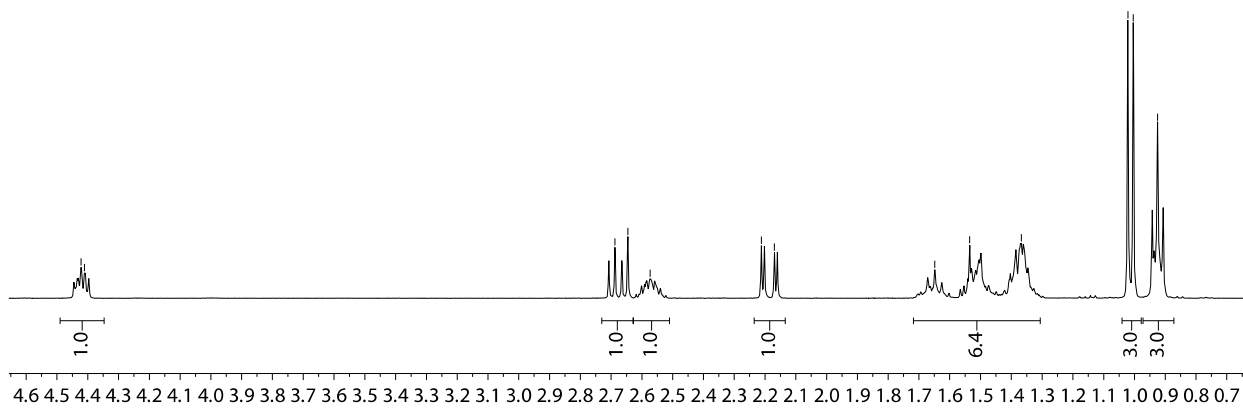

~176.82

~83.75

~37.68  
~33.17  
~29.70  
~28.16  
~22.62

~13.96  
~13.92

CDCl<sub>3</sub>, 100 MHz

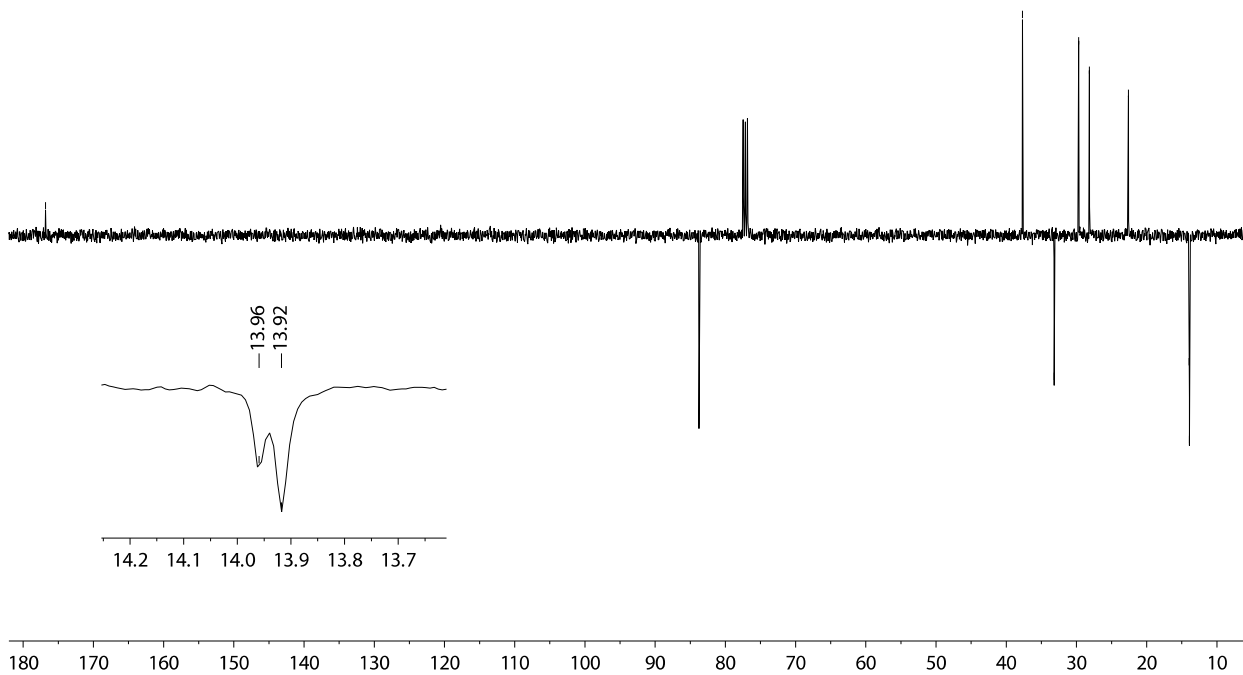

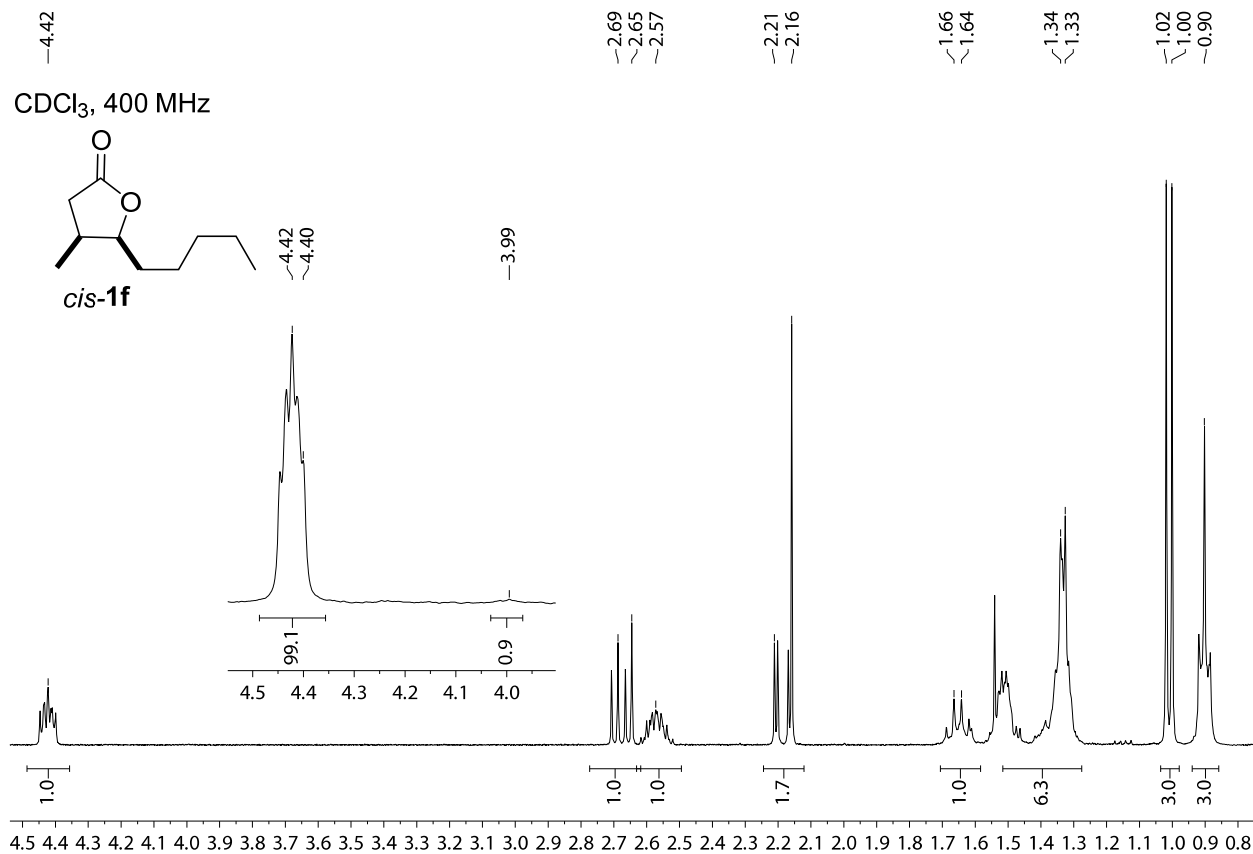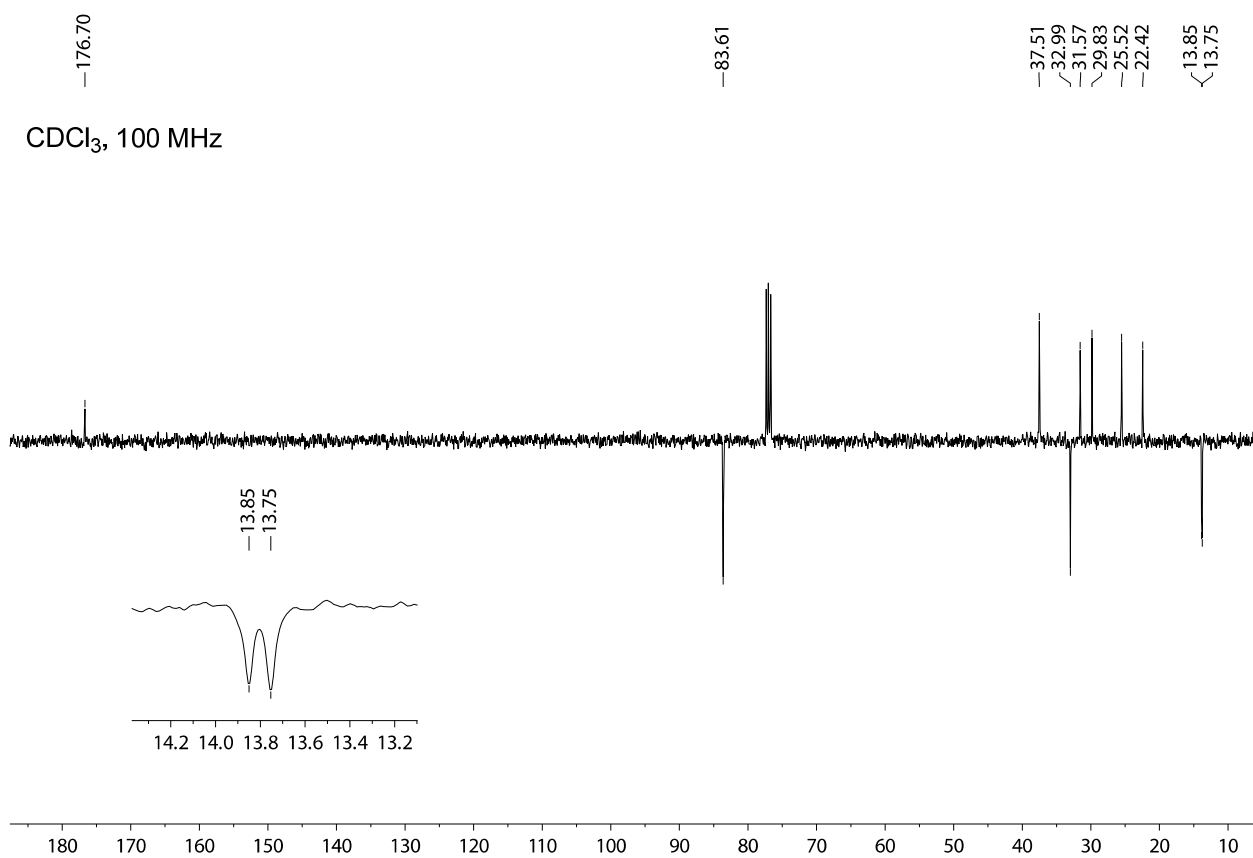

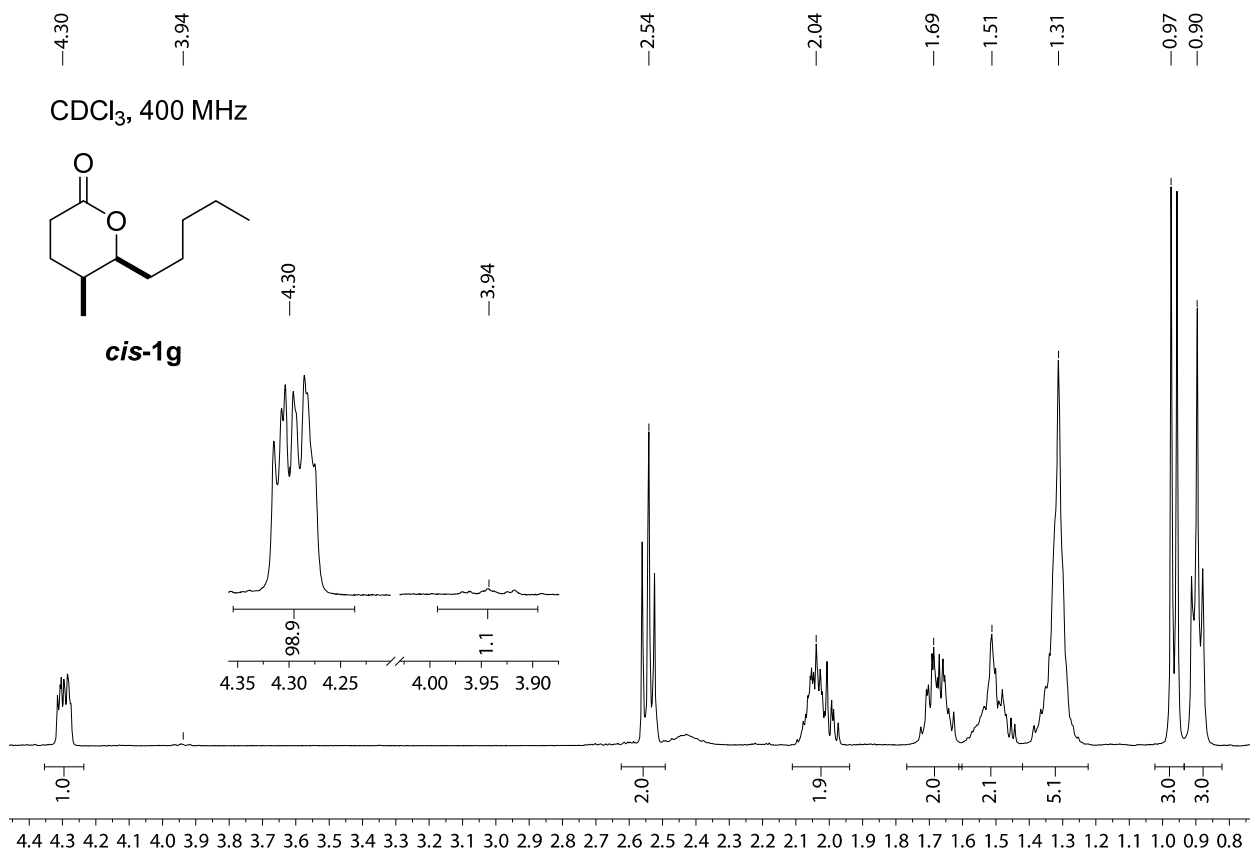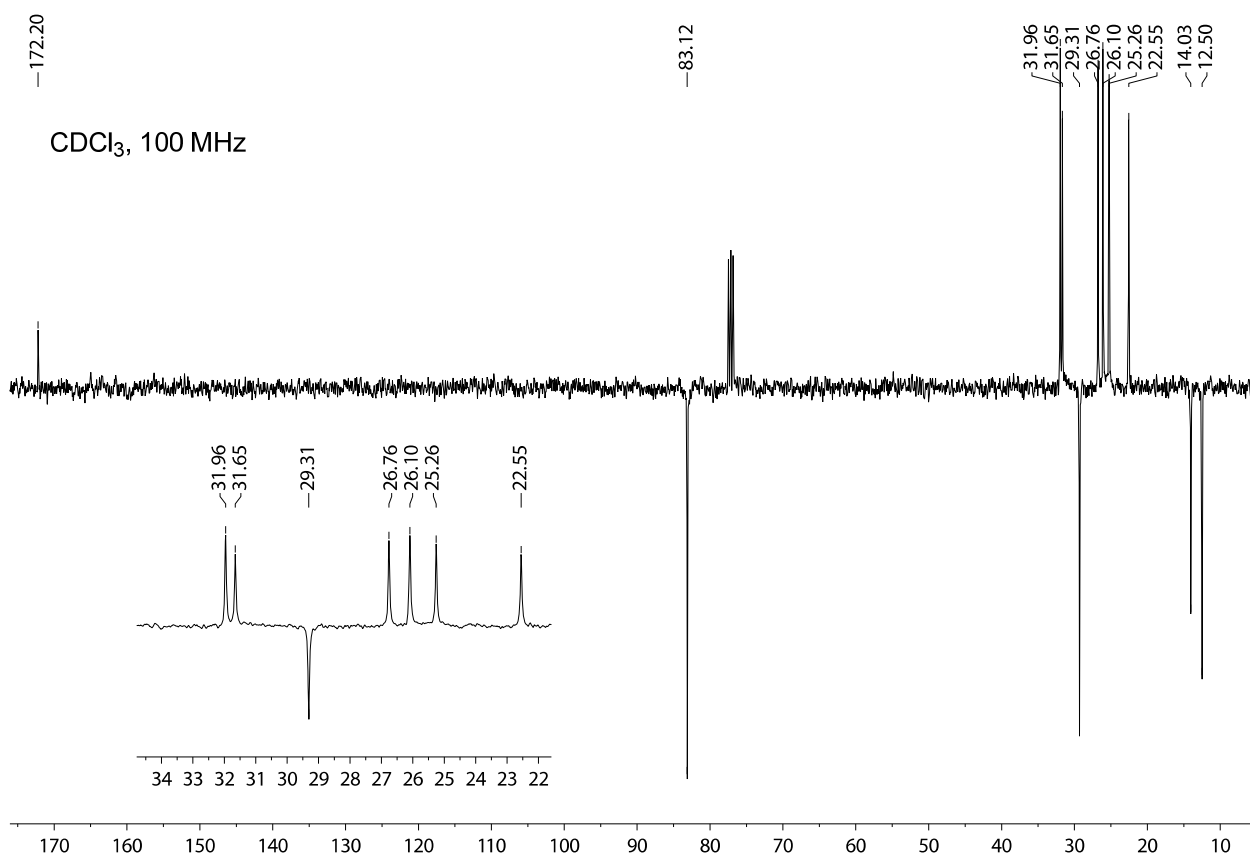

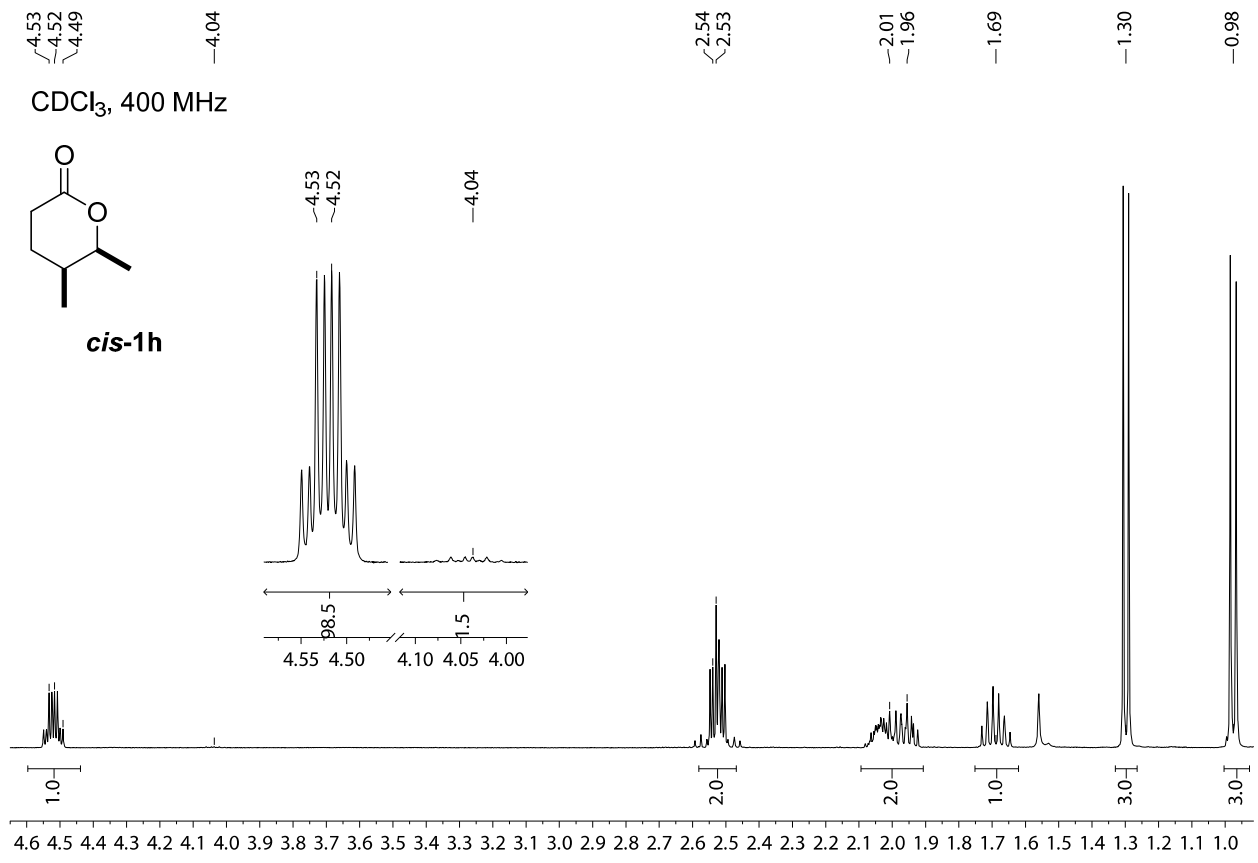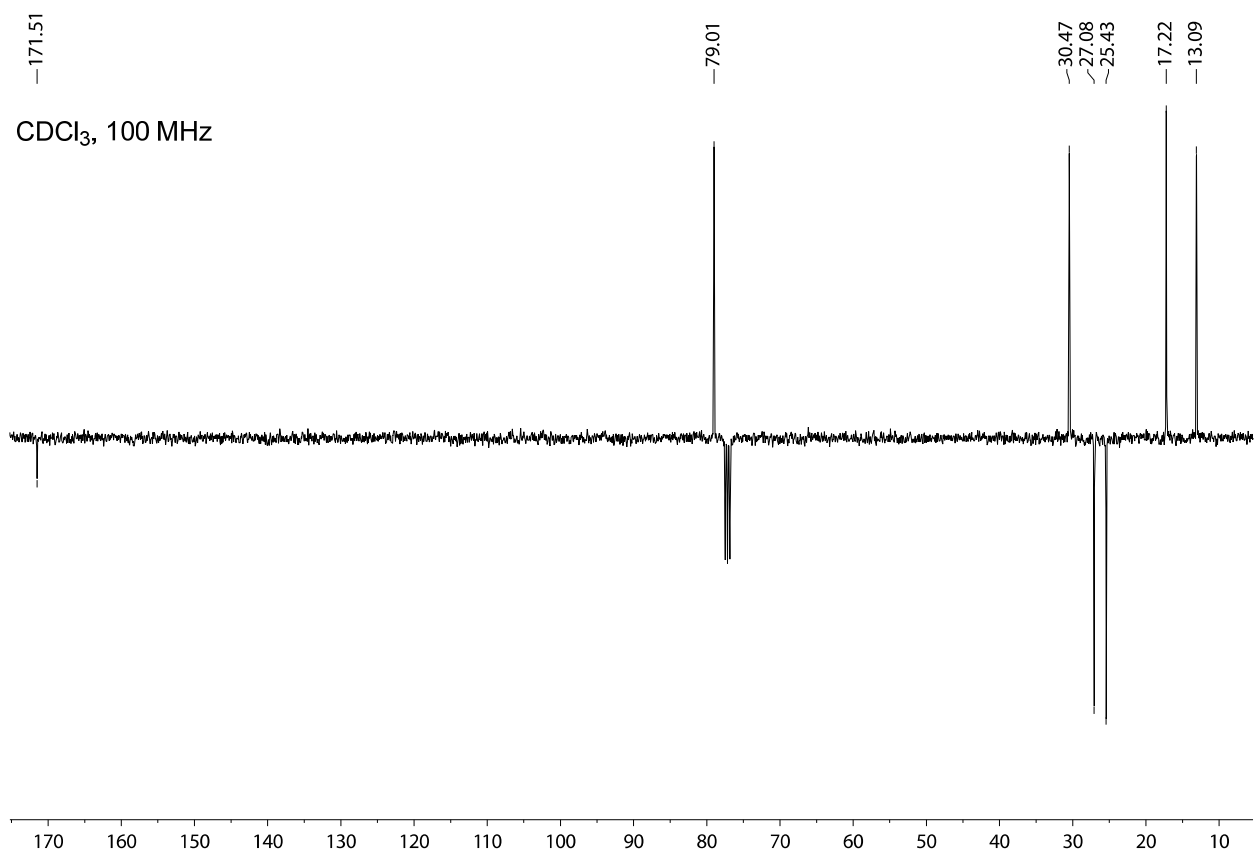

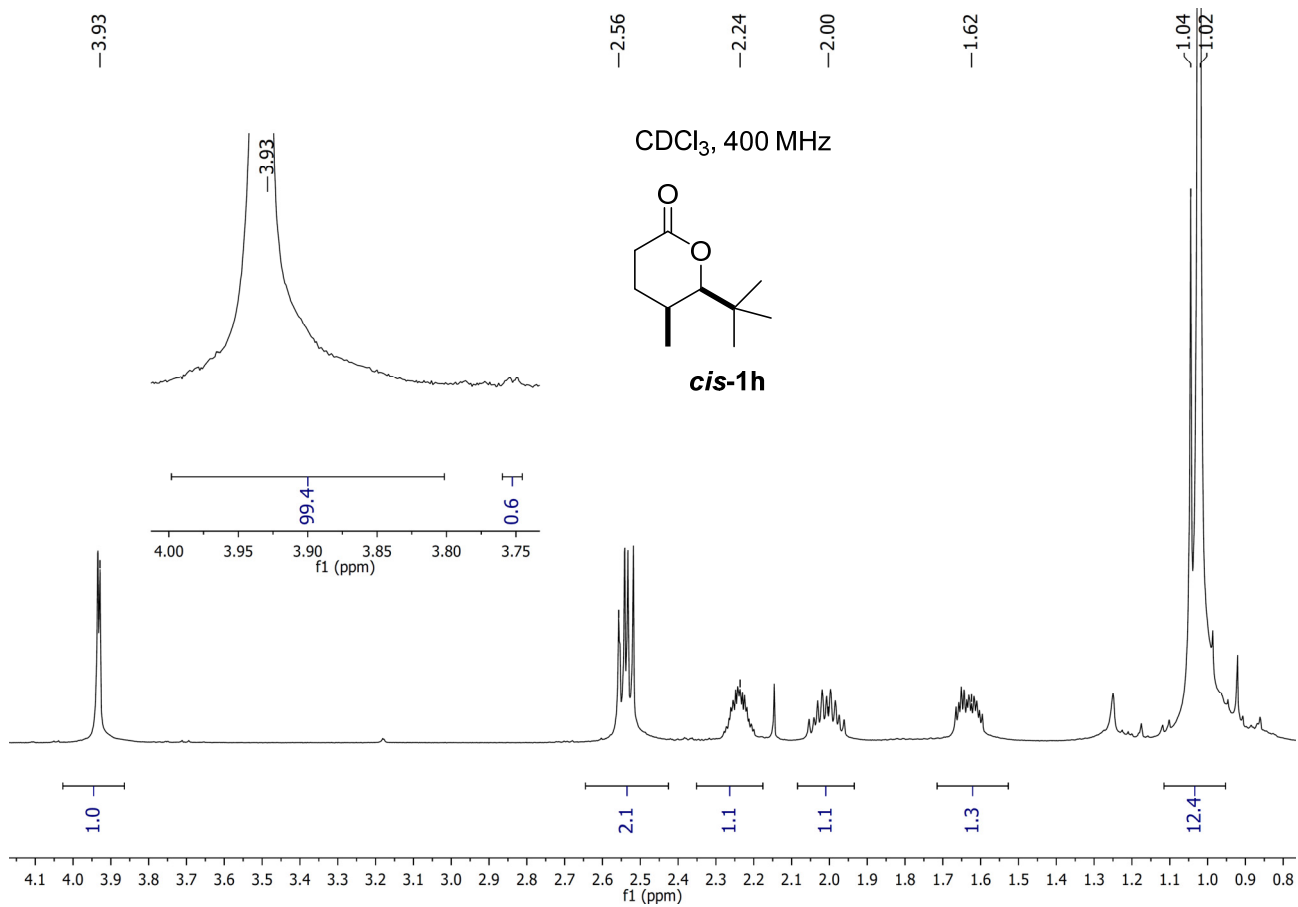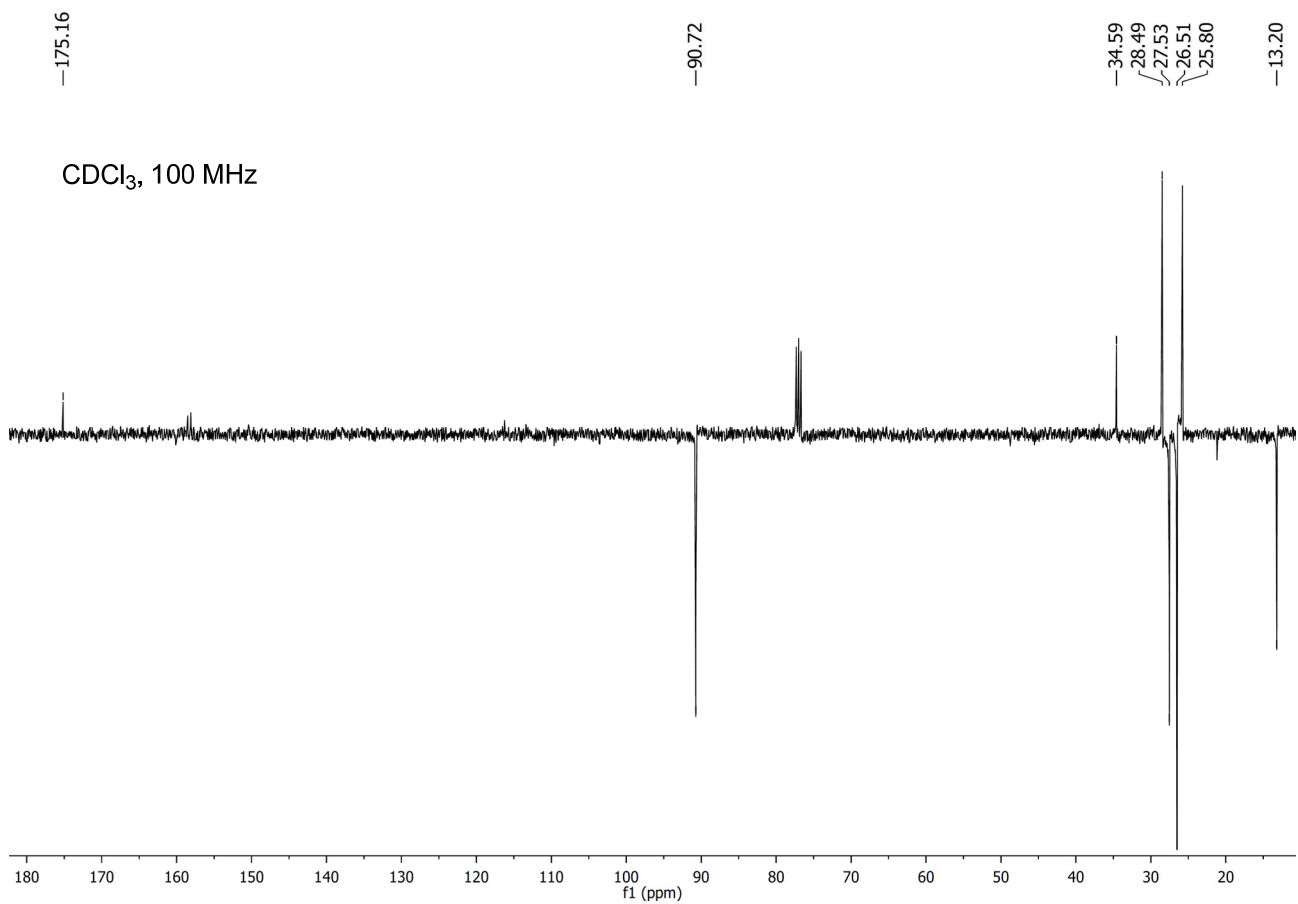

## Kinetic study

The rate law of cyclization of hydroxyesters **E** to give the lactone **L** (Figure SI.1) can be written as:

$$-\frac{d[E]}{dt} = k_2[AH][E] = k_{\text{obs}}[E]$$

where  $k_{\text{obs}} = k_2 [\text{TFA}]$  is the experimental *pseudo* first-order rate constant, and  $k_2$  is the true second-order catalytic rate constant.

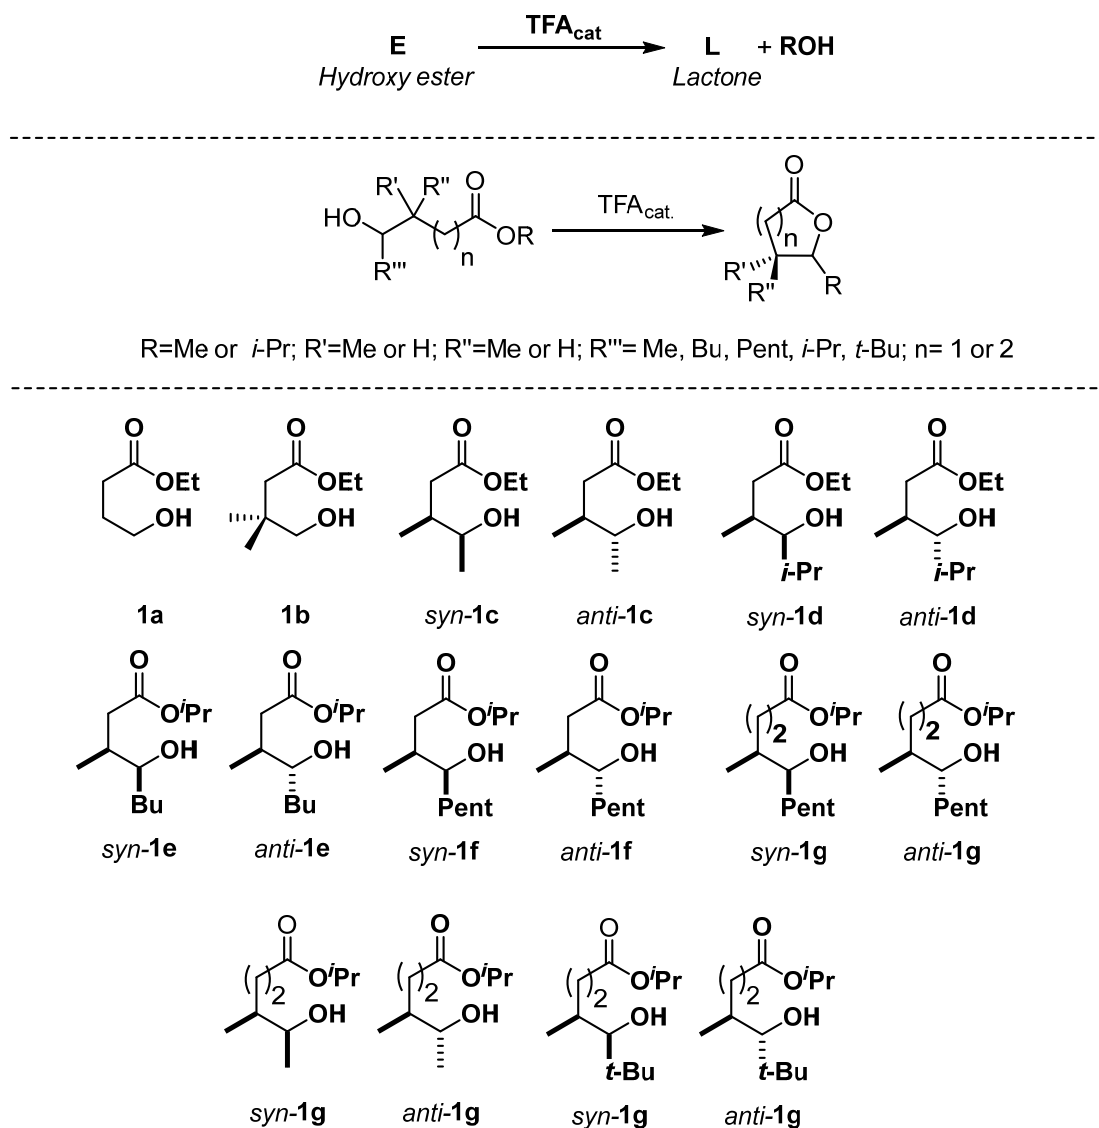

**Figure SI.1** Kinetic scheme and hydroxyesters studied.

The observed pseudo-first order reaction rate constant  $k_{\text{obs}}$  was obtained by linear regression of  $\ln[E]/[E]_0$  or *versus* time. The data were analyzed using *Sigmaplot* software.

The rate constants  $k_2$  of compounds **1a-b** have been previously measured.<sup>12</sup> The relative rate constants  $k_r$  were calculated with respect to **1a**, where  $k_r = k_{2,(1i)}/k_{2,(1a)}$  (with  $i = \text{c-d}$ ). The relative Gibbs energy barriers ( $\delta\Delta G_r^\ddagger$ ) were calculated with respect to **1a** by the following equation:

$$\delta\Delta G_r^\ddagger = -RT \ln k_r \quad \text{where } RT = 0.602 \text{ kcal}\cdot\text{mol}^{-1}$$

The selectivity  $s$  between the fastest and the slowest diastereoisomer (*anti* vs. *syn*) of **1c** in different solvents were calculated by the equation:  $s = k_{\text{obs},(\text{anti-1c})}/k_{\text{obs},(\text{syn-1c})}$ .

The difference between the Gibbs energy barriers ( $\delta\Delta G_{r,\text{syn}/\text{anti}}^\ddagger$ ) of the slow and the fastest isomer was calculate by the following equation:

$$\delta\Delta G_{r,\text{anti}/\text{syn}}^\ddagger = -RT \ln k_{r,\text{syn}/\text{anti}} \quad \text{where } RT = 0.602 \text{ kcal}\cdot\text{mol}^{-1}$$

Linear regression plots of TFA catalyzed ring closure in  $\text{CDCl}_3$  at 303 K

*Anti-1d*  $k_{\text{obs}} = (1.285 \pm 0.005) \times 10^{-3} \text{ s}^{-1}$ ,  $r^2 = 0.9998$ ,  $[\text{TFA}] = (2.11 \pm 0.10) \times 10^{-4} \text{ M}$

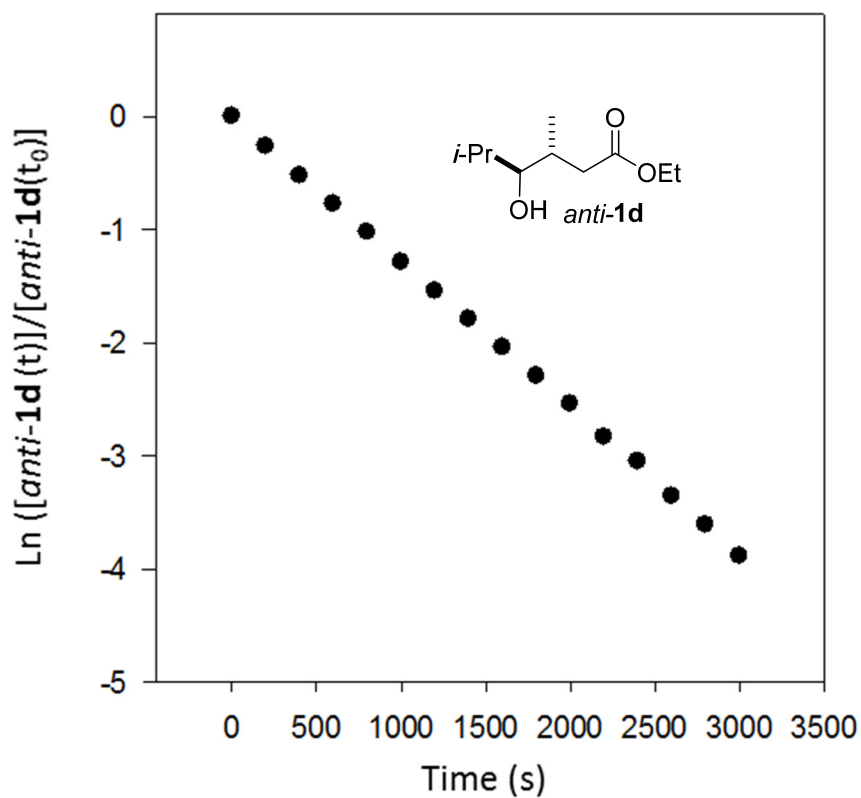

*Anti-1c*  $k_{\text{obs}} = (3.071 \pm 0.005) \times 10^{-4} \text{ s}^{-1}$ ,  $r^2 = 0.9993$ ,  $[\text{TFA}] = (2.11 \pm 0.10) \times 10^{-4} \text{ M}$

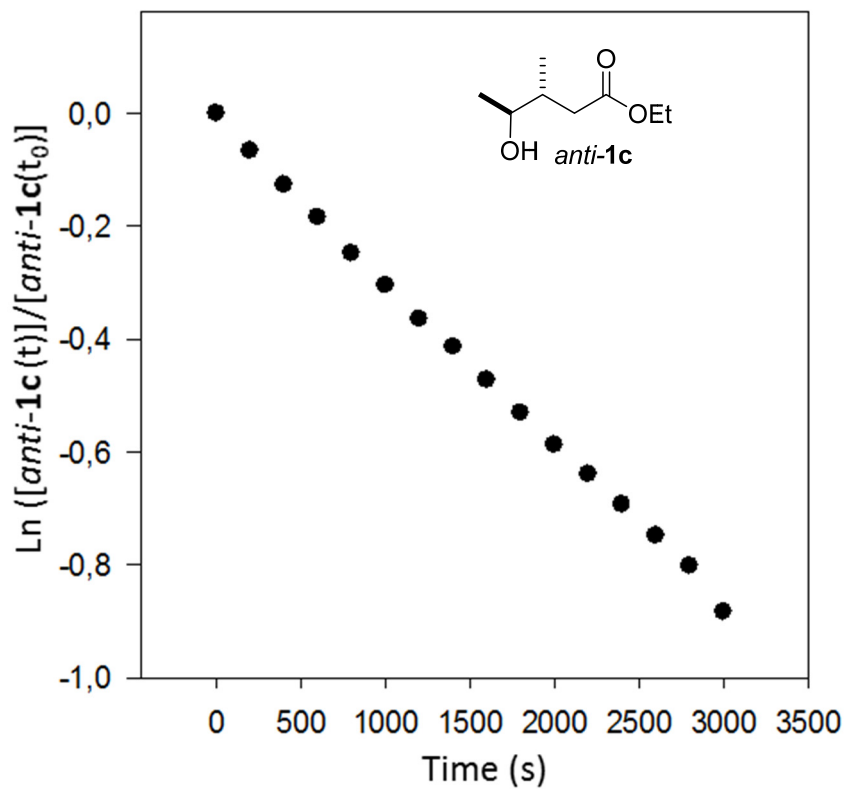



*Anti-1e*  $k_{\text{obs}}=(2.93\pm 0.04)\times 10^{-4}\text{s}^{-1}$ ,  $r^2=0.9990$

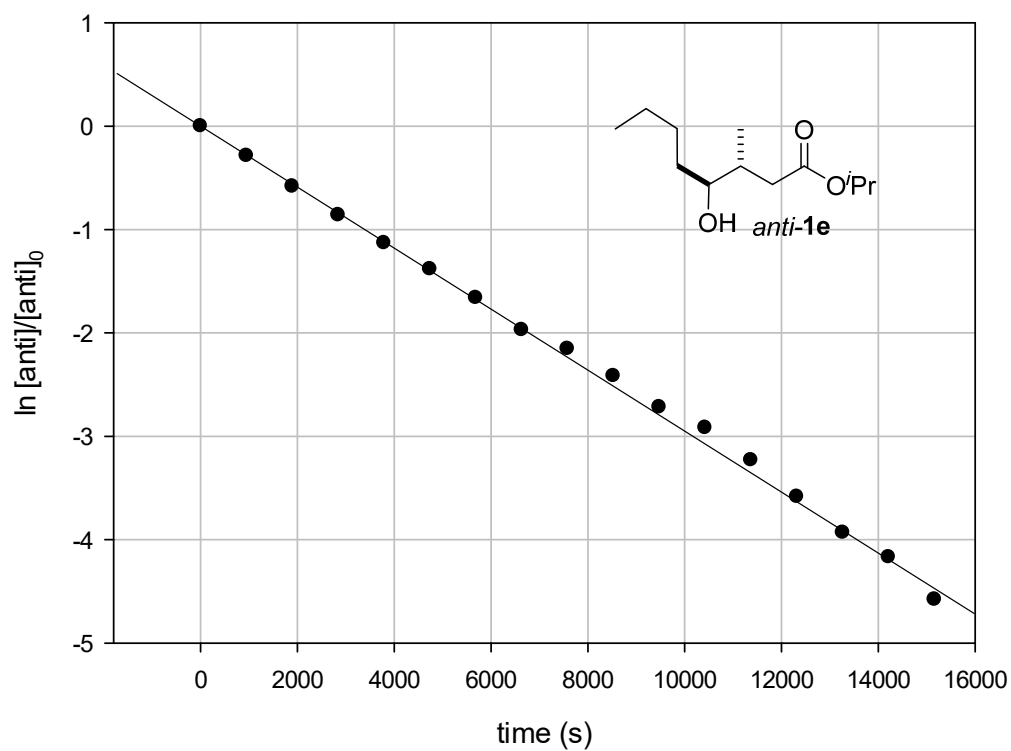

*Anti-1h*  $k_{\text{obs}}=(3.75\pm 0.04)\times 10^{-5}\text{s}^{-1}$ ,  $r^2=0.9995$

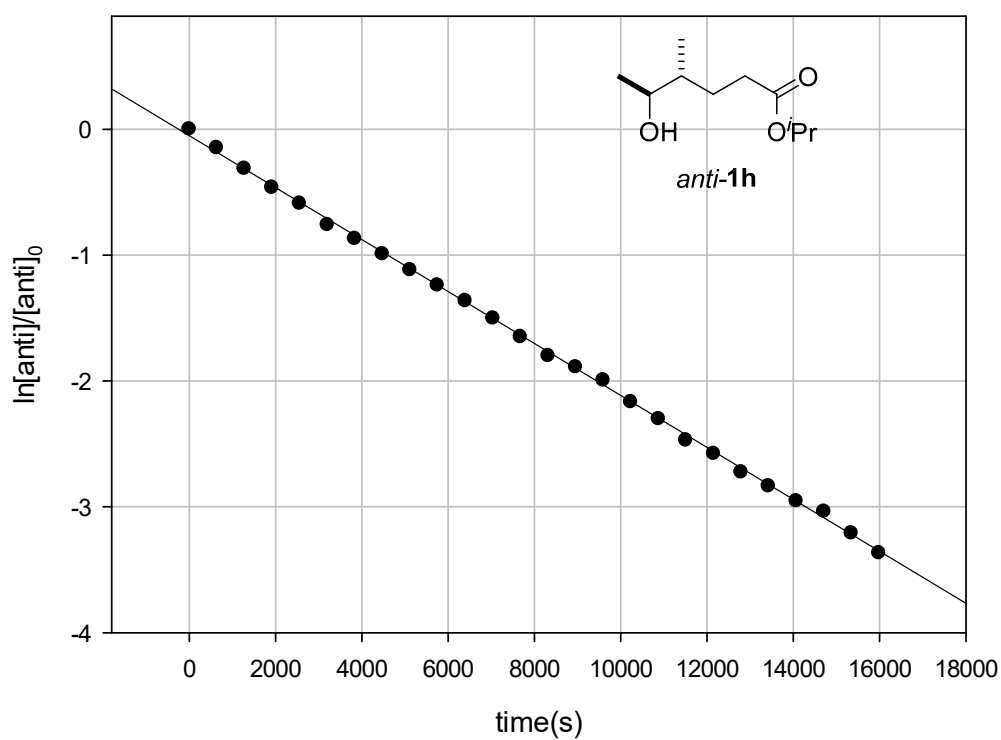

*Anti-1i*  $k_{\text{obs}} = (17.6742 \pm 0.04) \times 10^{-4} \text{ s}^{-1}$ ,  $r^2 = 0.9990$

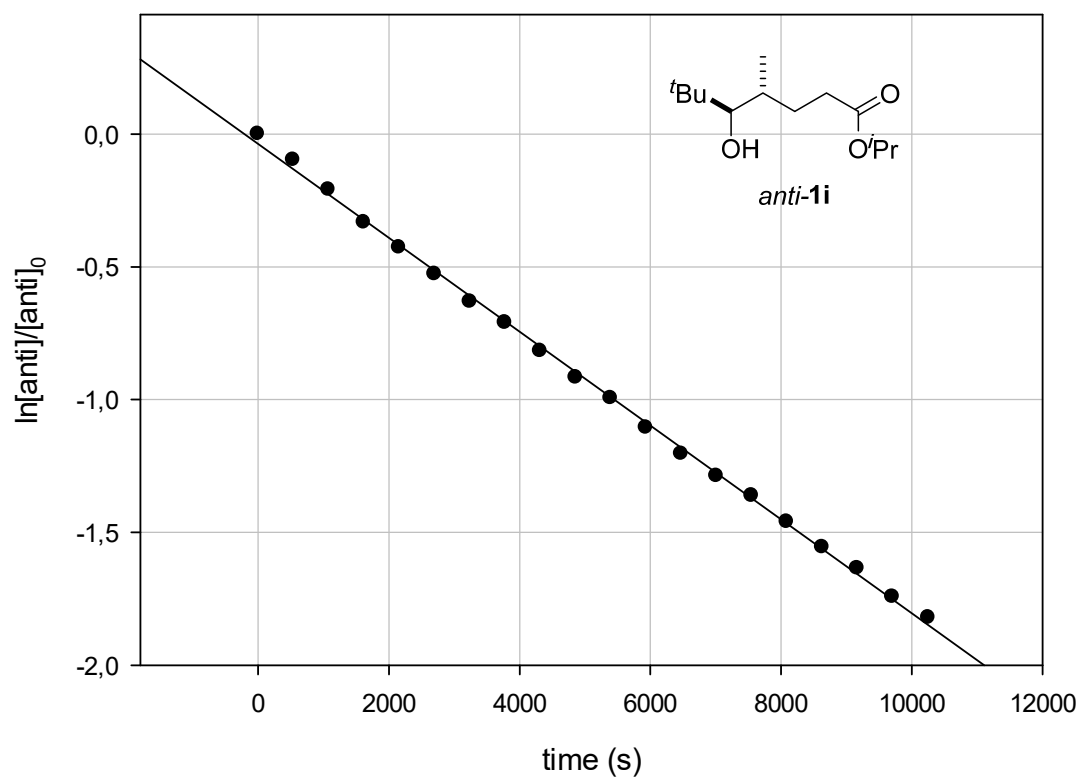

*Syn-1d*  $k_{\text{obs}}=(1.639\pm 0.005)\times 10^{-5}\text{ s}^{-1}$ ,  $r^2= 0.9999$ ,  $[\text{TFA}]=(2.11\pm 0.10)\times 10^{-4}\text{ M}$

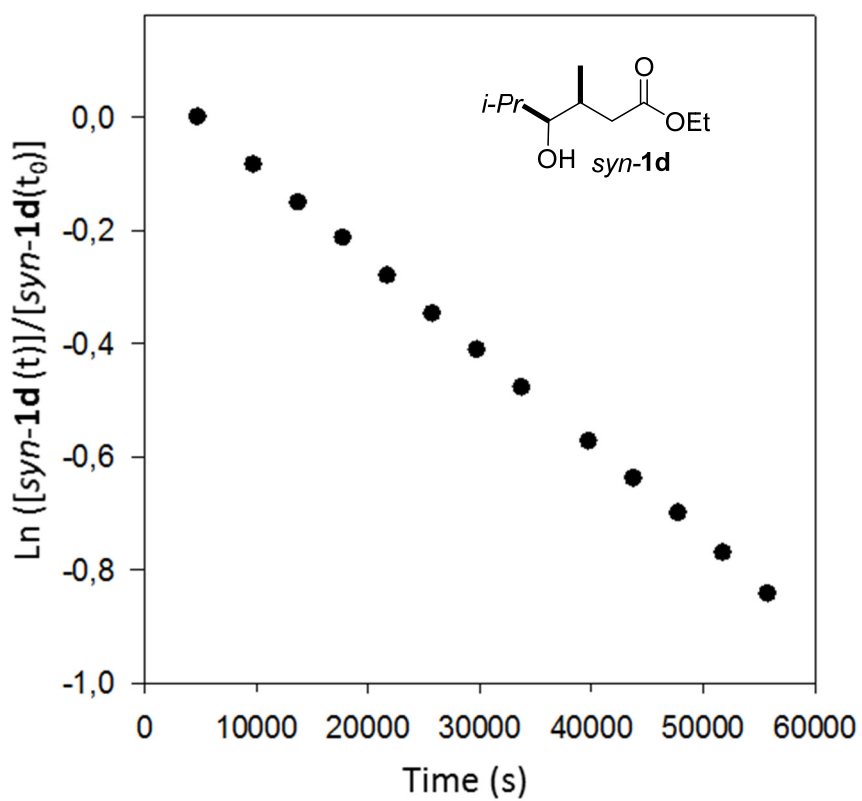

*Syn-1c*  $k_{\text{obs}}=(1.625\pm 0.005)\times 10^{-5}\text{ s}^{-1}$ ,  $r^2= 0.9999$ ,  $[\text{TFA}]=(2.11\pm 0.10)\times 10^{-4}\text{ M}$

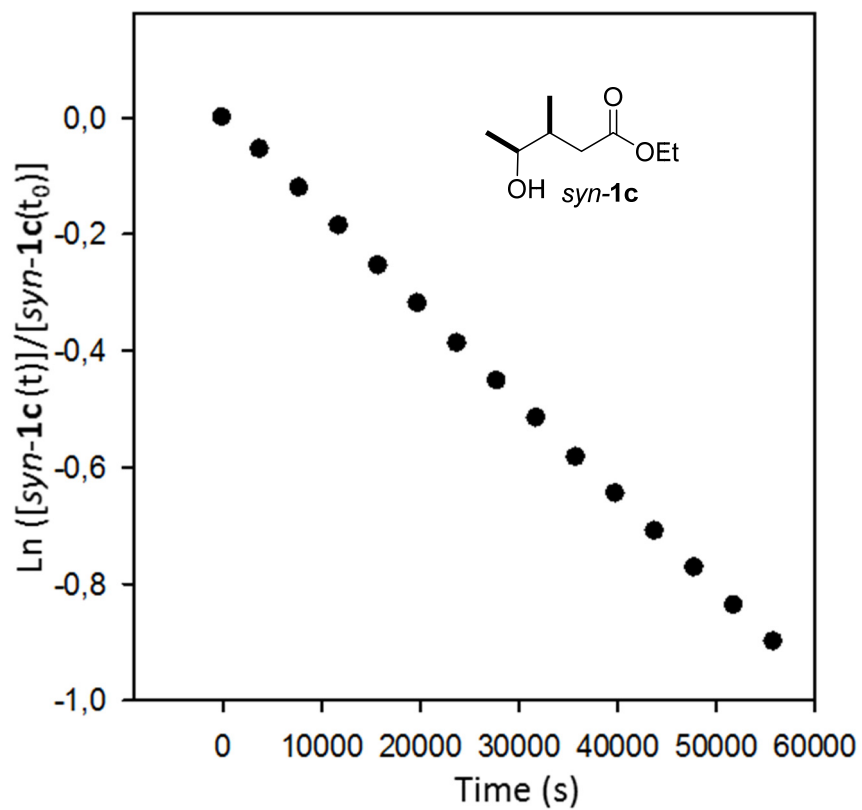

*Syn-1e*  $k_{\text{obs}}=(1.35\pm 0.01)\times 10^{-5}\text{s}^{-1}$ ,  $r^2= 0.999$

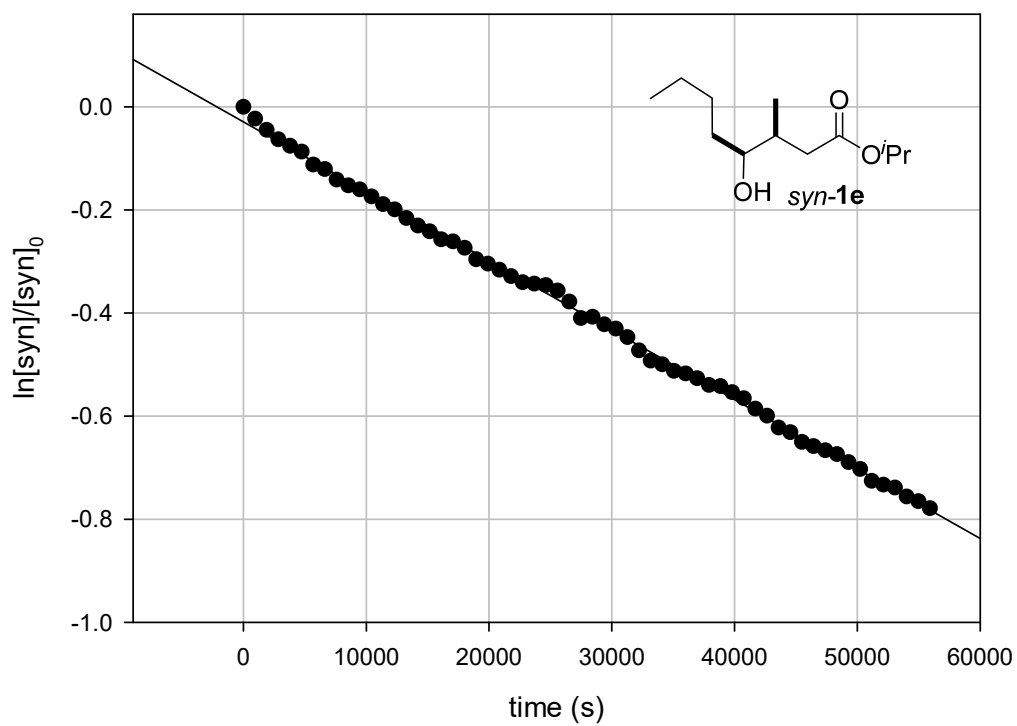

*Syn-1h*  $k_{\text{obs}}=(2.31\pm 0.01)\times 10^{-6}\text{s}^{-1}$ ,  $r^2= 0.996$

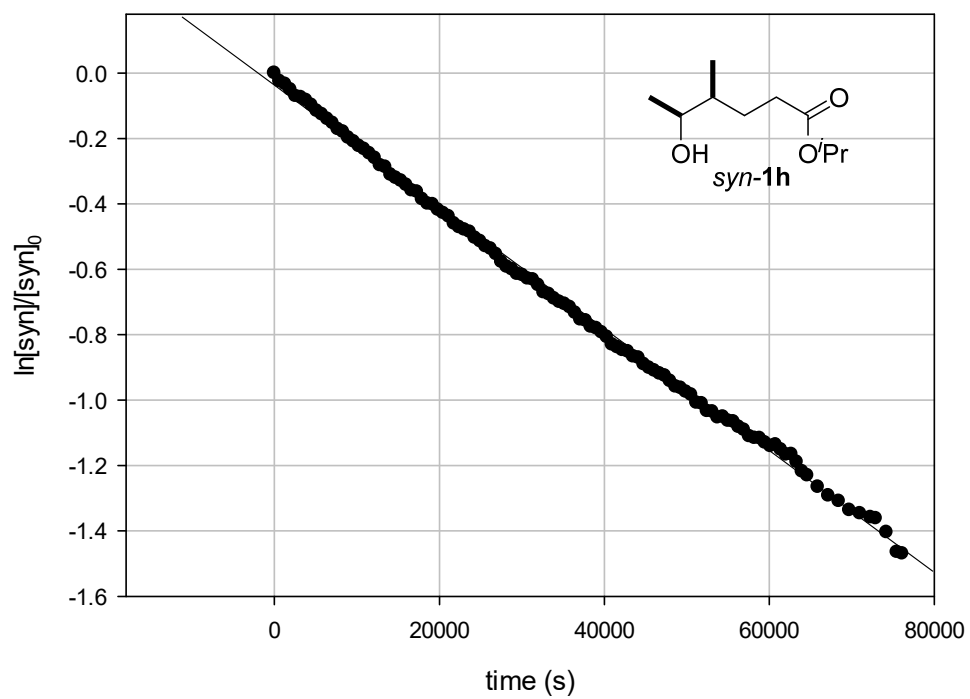

*Syn-1i*  $k_{obs}=(1.238 \pm 0.04) \times 10^{-5} \text{ s}^{-1}$ ,  $r^2= 0.9988$

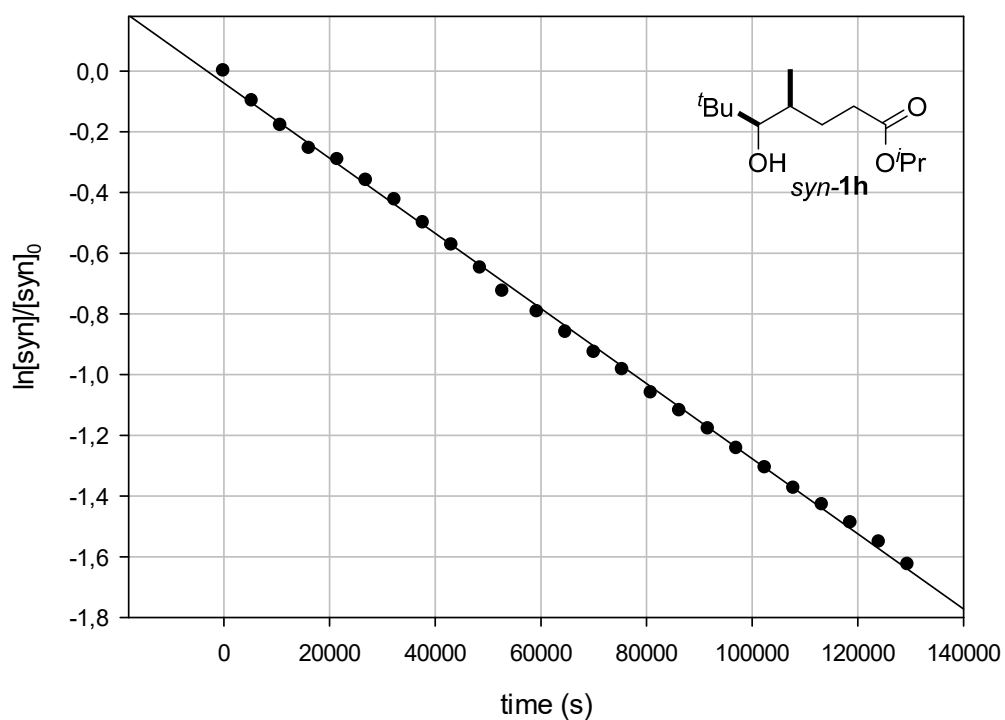

**Table SI-1.** Summary of kinetic data in  $\text{CDCl}_3$  at 303 K.

| Hydroxyester   | $k_2$<br>( $\text{s}^{-1} \text{ M}^{-1}$ ) | $\Delta G^\ddagger$<br>( $\text{kcal mol}^{-1}$ ) | $\delta \Delta G^\ddagger$<br>( $\text{kcal mol}^{-1}$ ) | $k_{rel, 1a}$ | Selectivity<br>$s=k_{anti}/k_{syn}$ |
|----------------|---------------------------------------------|---------------------------------------------------|----------------------------------------------------------|---------------|-------------------------------------|
| <b>1a</b>      | $1.466 \times 10^{-2}$ (a)                  | 20.29                                             | 0                                                        | 1             |                                     |
| <b>1b</b>      | $6.373 \times 10^{-2}$ (a)                  | 19.41                                             | -0.88                                                    | 4.34          |                                     |
| <b>Syn-1c</b>  | $7.701 \times 10^{-2}$                      | 19.29                                             | -1.00                                                    | 5.26          | 18.88                               |
| <b>Anti-1c</b> | 1.456                                       | 17.52                                             | -2.77                                                    | 99.4          |                                     |
| <b>Syn-1d</b>  | $7.771 \times 10^{-2}$                      | 19.29                                             | -1.00                                                    | 5.30          | 78.40                               |
| <b>Anti-1d</b> | 6.090                                       | 16.66                                             | -3.63                                                    | 415.0         |                                     |

(a) Ref. 12

Solvent effect for 1c in C<sub>6</sub>D<sub>6</sub>

*Anti-1c*  $k_{\text{obs}}=(1.036\pm 0.010)\times 10^{-4}\text{ s}^{-1}$ ,  $r^2=0.9980$

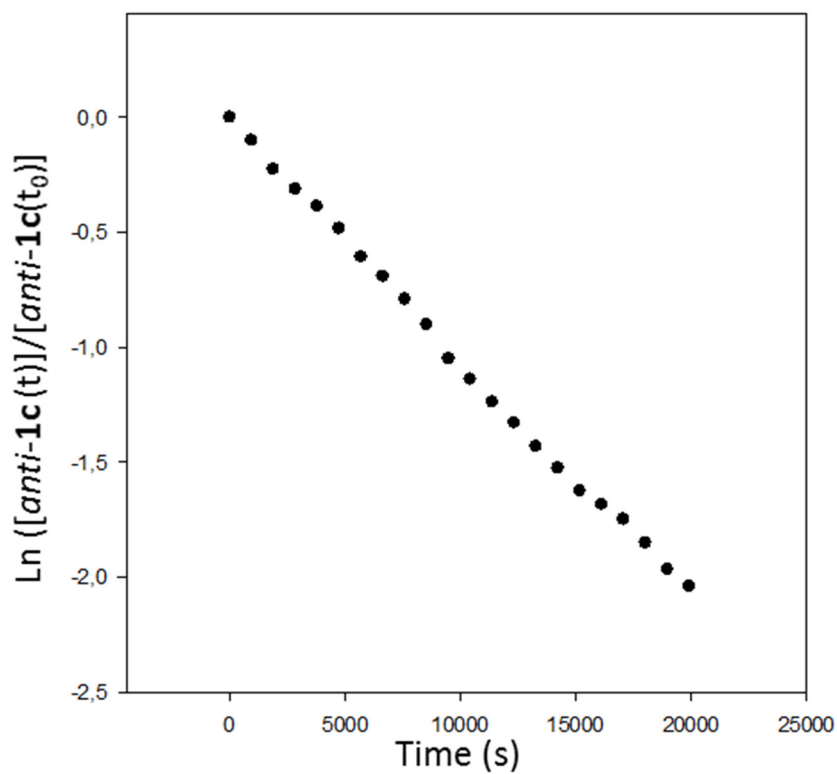

*Syn-1c*  $k_{\text{obs}}=(3.953\pm 0.001)\times 10^{-6}\text{ s}^{-1}$ ,  $r^2=0.9996$

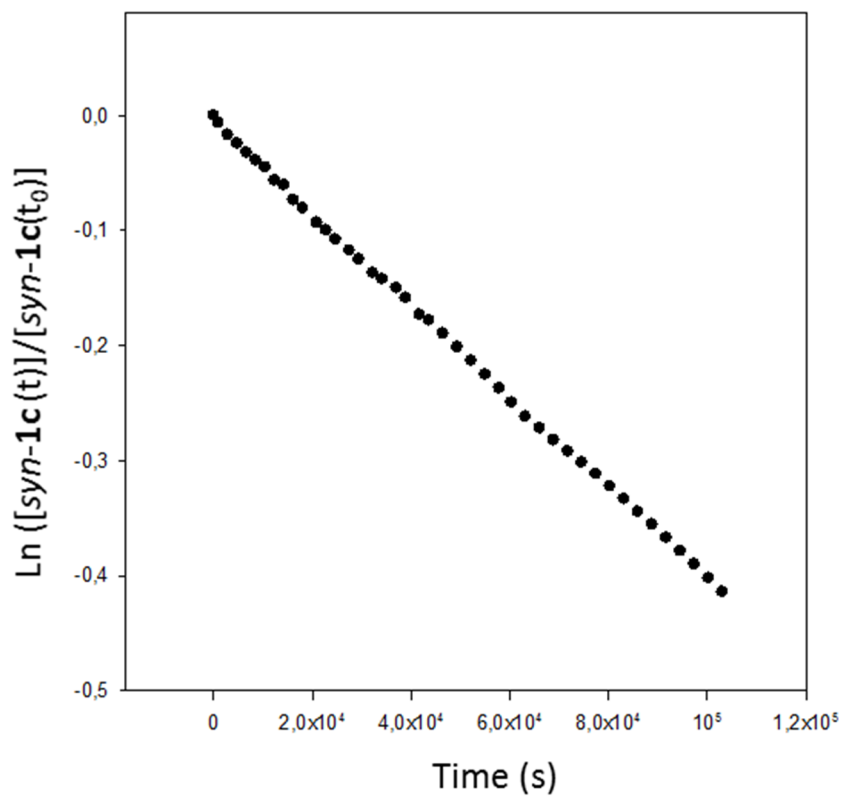

Solvent effect for 1c in CD<sub>3</sub>CN

*Anti-1c*  $k_{\text{obs}}=(5.310\pm 0.003)\times 10^{-4}\text{ s}^{-1}$ ,  $r^2= 0.9997$

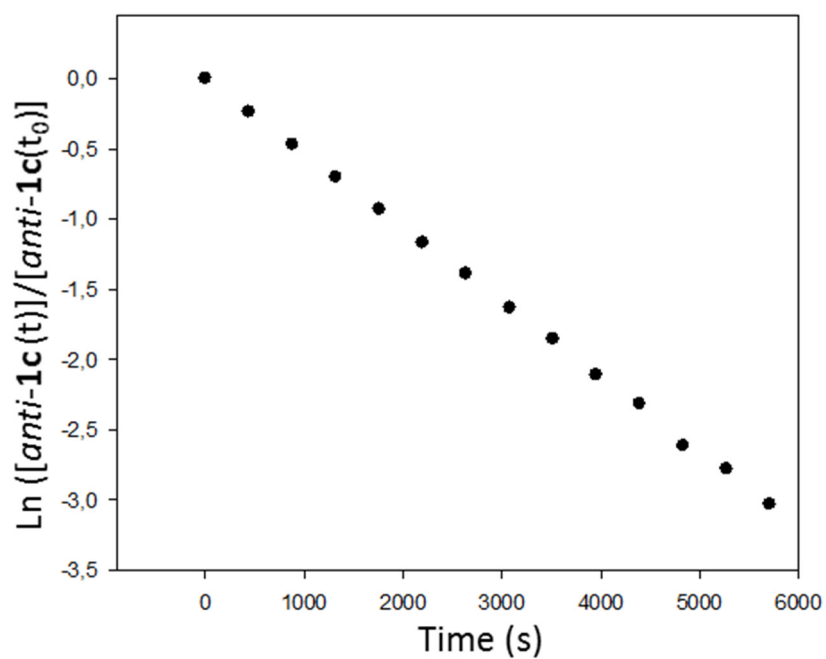

*Syn-1c*  $k_{\text{obs}}=(4.226\pm 0.002)\times 10^{-5}\text{ s}^{-1}$ ,  $r^2= 0.9996$

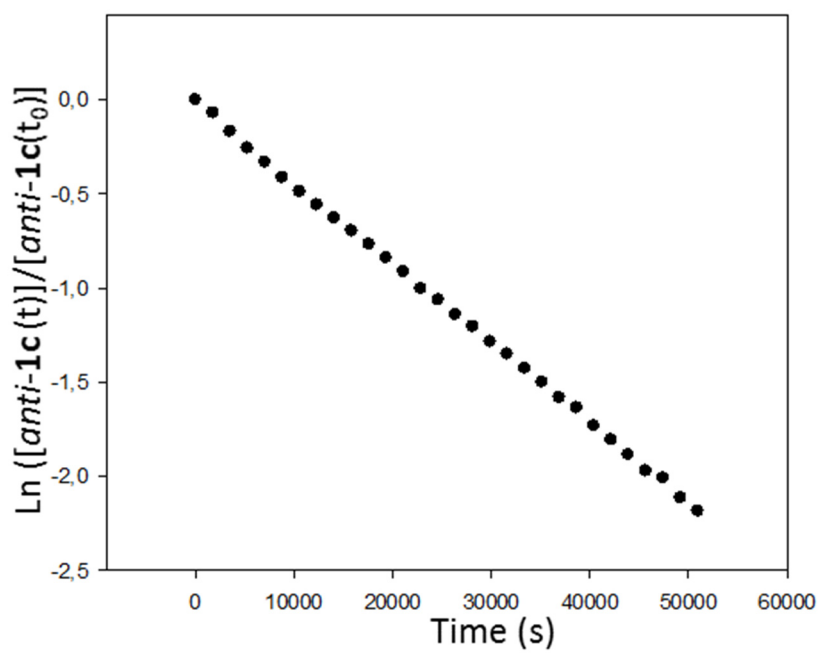

**Solvent effect for 1c in D<sub>2</sub>O**

*Anti-1c*  $k_{\text{obs}}=(6.186\pm 0.006)\times 10^{-4}\text{ s}^{-1}$ ,  $r^2= 0.9988$

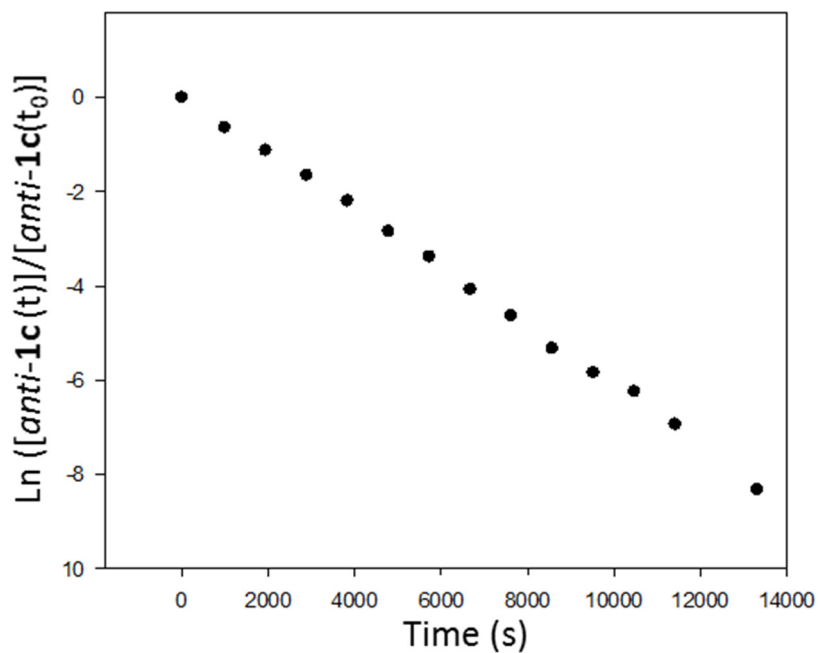

*Syn-1c*  $k_{\text{obs}}=(5.913\pm 0.008)\times 10^{-5}\text{ s}^{-1}$ ,  $r^2= 0.9970$

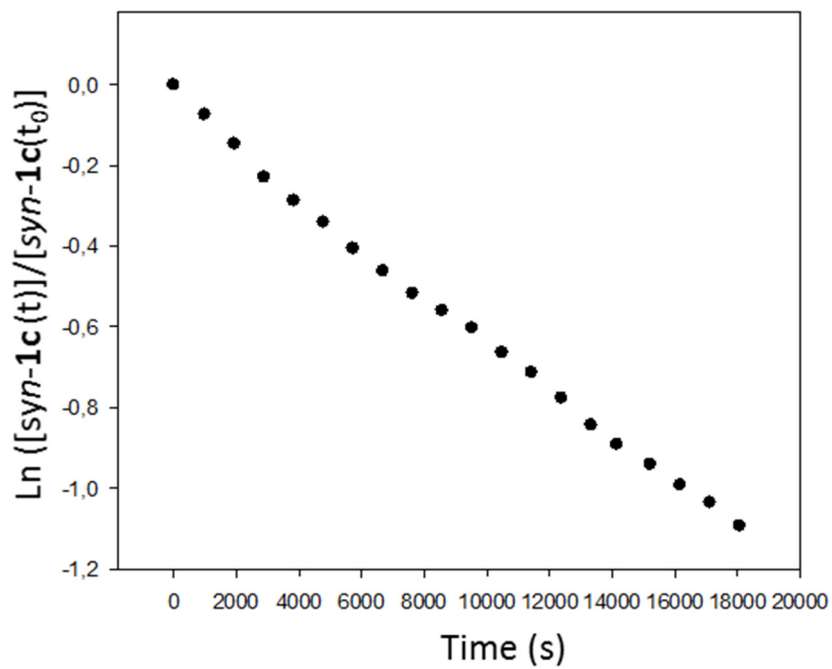



**Table SI-2.** Summary of kinetic data of **1c** in different solvents at 303 K.

| <b>Solvent</b>                | <b><math>K_{obs,anti}</math></b> | <b><math>K_{obs,syn}</math></b> | <b>Selectivity</b><br><b><math>k_{r,anti/syn}</math></b> | <b><math>\delta\Delta G^\ddagger</math></b><br><b>(kcal mol<sup>-1</sup>)</b> |
|-------------------------------|----------------------------------|---------------------------------|----------------------------------------------------------|-------------------------------------------------------------------------------|
| C <sub>6</sub> D <sub>6</sub> | 1.036 x 10 <sup>-4</sup>         | 3.953 x 10 <sup>-6</sup>        | 26.2                                                     | -1.97                                                                         |
| CDCl <sub>3</sub>             | 3.071 x 10 <sup>-4</sup>         | 1.625 x 10 <sup>-5</sup>        | 18.9                                                     | -1.77                                                                         |
| CD <sub>3</sub> CN            | 5.310 x 10 <sup>-4</sup>         | 4.226 x 10 <sup>-5</sup>        | 12.6                                                     | -1.52                                                                         |
| D <sub>2</sub> O              | 6.186 x 10 <sup>-4</sup>         | 5.913 x 10 <sup>-5</sup>        | 10.5                                                     | -1.41                                                                         |
| <i>d6</i> -DMSO               | -                                | -                               | -                                                        | -                                                                             |

## References and Notes

- <sup>1</sup> S. E. Denmark and D. C. Forbes *Tetrahedron Lett.* 1992, **33**, 5037-5040.
- <sup>2</sup> E. Brenna, F. G. Gatti, D. Monti, F. Parmeggiani, A. Sacchetti and J. Valoti *J. Mol. Catal. B.: Enzym.* 2015, **114**, 77-85.
- <sup>3</sup> The purity of hydroxyesters cannot be determined by GC, since, these esters partially close into the GC injector.
- <sup>4</sup> J. A. Marshall and A. W. Garofalo *J. Org. Chem.*, 1993, **58**, 3675-3680.
- <sup>5</sup> J. Swatschek, L. Grothues, J. O. Bauer, C. Strohmam and M. Christmann *J. Org. Chem.*, 2014, **79**, 976-3983.
- <sup>6</sup> The hydroxyesters can be stored at -20 °C for several months, in presence of a small amount of NEt<sub>3</sub>, otherwise at rt undergo to spontaneous cyclization.
- <sup>7</sup> The purity of hydroxyesters cannot be detected by GC-MS, because the esters close partially into the GC-injector.
- <sup>8</sup> T. Ebata, K. Matsumoto, H. Yoshikoshi, K. Koseki, H. Kawakami, K. O. and H. Matsushita *Heterocycle*, 1993, **36**, 1071-1026.
- <sup>9</sup> The reaction progress was monitored by <sup>1</sup>H-NMR analysis. A sample (0.1 mL) was quickly added to a precooled solution of NEt<sub>3</sub> (50 mg) in CH<sub>2</sub>Cl<sub>2</sub> (0.5 mL), then the solvent was removed under reduced pressure and submitted to the <sup>1</sup>H-NMR analysis.
- <sup>10</sup> It is important to remove the alcohol (*i*-PrOH or EtOH) before the O-silylation.
- <sup>11</sup> E. Brenna, F. G. Gatti, D. Monti, F. Parmeggiani, A. Sacchetti and J. Valoti *J. Mol. Catal. B.: Enzym.* 2015, **114**, 77-85.
- <sup>12</sup> E. Brenna, F. Distanto, F. G. Gatti and G. Gatti *Catal. Sci. Technol.*, 2017, **7**, 1497-1507.
